# Supplementary material
Source: PubMed Central journal article supplement (PMC4600463)

## Supporting information

### Probing the Structural Requirements of Non-electrophilic Naphthalene-Based Nrf2 Activators

Atul D. Jain,<sup>1</sup> Benjamin G. Richardson,<sup>1</sup> Haranatha Potteti,<sup>2</sup> Laura Kingsley,<sup>4</sup> Julia P. Luciano,<sup>3</sup> Aya F. Ryuzoji,<sup>3</sup> Aleksej Kronic,<sup>1</sup> Andrew D. Mesecar,<sup>3,4</sup> Sekhar P. Reddy,<sup>2,5</sup> Terry W. Moore<sup>\*,1,5</sup>

<sup>1</sup>Department of Medicinal Chemistry and Pharmacognosy, College of Pharmacy; <sup>2</sup>Department of Pediatrics, College of Medicine; and <sup>5</sup>University of Illinois Cancer Center; University of Illinois at Chicago, 833 S. Wood St., Chicago, IL 60612

<sup>3</sup>Department of Biological Sciences and the <sup>4</sup>Center for Cancer Research, Purdue University, West Lafayette, IN 47907

#### Table of contents:

S1 X-ray structure parameters of the Kelch domain from human Keap1 in complex with compound **12e**

S2 <sup>1</sup>H NMR of compound **8** at 298K and 353K

S1 X-ray structure parameters of the Kelch domain from human Keap1 in complex with compound **12e**

REMARK Date 2014-12-15 Time 07:53:17 EST -0500 (1418647997.49 s)

REMARK PHENIX refinement

REMARK

REMARK \*\*\*\*\* INPUT FILES AND LABELS

\*\*\*\*\*

REMARK Reflections:

REMARK file name : /Keap1-Kelch/Kelech-X-ray/P2\_243.sca

REMARK labels : ['I,SIGI']

REMARK R-free flags:

REMARK file name : None

REMARK label : R-free-flags

REMARK test\_flag\_value: 1

REMARK Model file name(s):

REMARK /Keap1-Kelch/Kelech-X-ray/Kelch1\_refine\_35-coot-new.pdb

REMARK

REMARK \*\*\*\*\* REFINEMENT SUMMARY: QUICK FACTS

\*\*\*\*\*

REMARK Start: r\_work = 0.1722 r\_free = 0.2281 bonds = 0.004 angles = 0.690

REMARK Final: r\_work = 0.1707 r\_free = 0.2287 bonds = 0.002 angles = 0.656

REMARK

\*\*\*\*\*

REMARK

REMARK \*\*\*\*\* REFINEMENT STATISTICS STEP BY STEP

\*\*\*\*\*

REMARK leading digit, like 1\_, means number of macro-cycle

REMARK 0 : statistics at the very beginning when nothing is done yet

REMARK 1\_bss: bulk solvent correction and/or (anisotropic) scaling

REMARK 1\_xyz: refinement of coordinates

REMARK 1\_adp: refinement of ADPs (Atomic Displacement Parameters)

REMARK 1\_occ: refinement of occupancies

REMARK -----

REMARK R-factors, x-ray target values and norm of gradient of x-ray target

REMARK stage r-work r-free xray\_target\_w xray\_target\_t

REMARK 0 : 0.2428 0.2872 3.557282e+00 3.719003e+00

REMARK 1\_bss: 0.1722 0.2281 3.387221e+00 3.596589e+00

REMARK 1\_ohs: 0.1722 0.2281 3.387221e+00 3.596589e+00

REMARK 1\_fit: 0.1721 0.2279 3.387741e+00 3.596411e+00

REMARK 1\_xyz: 0.1709 0.2278 3.384380e+00 3.595955e+00

REMARK 1\_adp: 0.1715 0.2282 3.386448e+00 3.596656e+00

REMARK 1\_occ: 0.1715 0.2282 3.386457e+00 3.596681e+00

REMARK 2\_bss: 0.1715 0.2288 3.387824e+00 3.598027e+00

REMARK 2\_ohs: 0.1715 0.2288 3.387824e+00 3.598027e+00

REMARK 2\_fit: 0.1745 0.2269 3.390618e+00 3.593311e+00  
 REMARK 2\_xyz: 0.1732 0.2275 3.388582e+00 3.595748e+00  
 REMARK 2\_adp: 0.1727 0.2275 3.387567e+00 3.595839e+00  
 REMARK 2\_occ: 0.1727 0.2275 3.387611e+00 3.595960e+00  
 REMARK 3\_bss: 0.1725 0.2265 3.386088e+00 3.594207e+00  
 REMARK 3\_ohs: 0.1725 0.2265 3.386088e+00 3.594207e+00  
 REMARK 3\_fit: 0.1718 0.2283 3.387633e+00 3.595668e+00  
 REMARK 3\_xyz: 0.1710 0.2286 3.386978e+00 3.598446e+00  
 REMARK 3\_adp: 0.1708 0.2287 3.385531e+00 3.598387e+00  
 REMARK 3\_occ: 0.1708 0.2287 3.385566e+00 3.598478e+00  
 REMARK 3\_bss: 0.1707 0.2287 3.385087e+00 3.598529e+00  
 REMARK 3\_ohs: 0.1707 0.2287 3.385087e+00 3.598529e+00

REMARK -----

| REMARK | stage  | <pher> | fom    | alpha  | beta           |
|--------|--------|--------|--------|--------|----------------|
| REMARK | 0      | :      | 28.235 | 0.7856 | 0.1404 368.599 |
| REMARK | 1_bss: | 23.230 | 0.8358 | 0.9437 | 192.929        |
| REMARK | 1_ohs: | 23.230 | 0.8358 | 0.9437 | 192.929        |
| REMARK | 1_fit: | 23.285 | 0.8353 | 0.9441 | 194.604        |
| REMARK | 1_xyz: | 23.205 | 0.8365 | 0.9447 | 196.072        |
| REMARK | 1_adp: | 23.176 | 0.8370 | 0.9397 | 196.656        |
| REMARK | 1_occ: | 23.176 | 0.8369 | 0.9397 | 196.672        |
| REMARK | 2_bss: | 23.218 | 0.8366 | 0.9432 | 197.892        |
| REMARK | 2_ohs: | 23.218 | 0.8366 | 0.9432 | 197.892        |
| REMARK | 2_fit: | 22.965 | 0.8389 | 0.9445 | 192.505        |
| REMARK | 2_xyz: | 23.040 | 0.8383 | 0.9436 | 194.027        |
| REMARK | 2_adp: | 23.042 | 0.8382 | 0.9375 | 193.946        |
| REMARK | 2_occ: | 23.045 | 0.8382 | 0.9375 | 194.024        |
| REMARK | 3_bss: | 22.987 | 0.8387 | 0.9442 | 192.592        |
| REMARK | 3_ohs: | 22.987 | 0.8387 | 0.9442 | 192.592        |
| REMARK | 3_fit: | 23.069 | 0.8381 | 0.9434 | 195.561        |
| REMARK | 3_xyz: | 23.109 | 0.8379 | 0.9429 | 197.997        |
| REMARK | 3_adp: | 23.097 | 0.8381 | 0.9379 | 198.059        |
| REMARK | 3_occ: | 23.099 | 0.8380 | 0.9379 | 198.116        |
| REMARK | 3_bss: | 23.099 | 0.8380 | 0.9429 | 198.094        |
| REMARK | 3_ohs: | 23.099 | 0.8380 | 0.9429 | 198.094        |

REMARK -----

| REMARK | stage  | angl  | bond  | chir  | dihe   | plan   | repu  | geom_target      |
|--------|--------|-------|-------|-------|--------|--------|-------|------------------|
| REMARK | 0      | :     | 0.690 | 0.004 | 0.045  | 14.219 | 0.002 | 3.902 4.6408e-02 |
| REMARK | 1_bss: | 0.690 | 0.004 | 0.045 | 14.219 | 0.002  | 3.902 | 4.6408e-02       |
| REMARK | 1_ohs: | 0.690 | 0.004 | 0.045 | 14.219 | 0.002  | 3.902 | 4.6408e-02       |
| REMARK | 1_fit: | 0.717 | 0.005 | 0.047 | 14.314 | 0.002  | 3.902 | 5.0524e-02       |
| REMARK | 1_xyz: | 0.663 | 0.002 | 0.041 | 14.161 | 0.002  | 3.902 | 4.2160e-02       |
| REMARK | 1_adp: | 0.663 | 0.002 | 0.041 | 14.161 | 0.002  | 3.902 | 4.2160e-02       |
| REMARK | 1_occ: | 0.663 | 0.002 | 0.041 | 14.161 | 0.002  | 3.902 | 4.2160e-02       |
| REMARK | 2_bss: | 0.663 | 0.002 | 0.041 | 14.161 | 0.002  | 3.902 | 4.2160e-02       |
| REMARK | 2_ohs: | 0.663 | 0.002 | 0.041 | 14.161 | 0.002  | 3.902 | 4.2160e-02       |

REMARK 2\_fit: 0.700 0.004 0.045 14.169 0.002 3.903 4.5406e-02  
 REMARK 2\_xyz: 0.660 0.002 0.041 13.998 0.002 3.903 4.1477e-02  
 REMARK 2\_adp: 0.660 0.002 0.041 13.998 0.002 3.903 4.1477e-02  
 REMARK 2\_occ: 0.660 0.002 0.041 13.998 0.002 3.903 4.1477e-02  
 REMARK 3\_bss: 0.660 0.002 0.041 13.998 0.002 3.903 4.1477e-02  
 REMARK 3\_ohs: 0.660 0.002 0.041 13.998 0.002 3.903 4.1477e-02  
 REMARK 3\_fit: 0.685 0.004 0.044 14.079 0.002 3.903 4.4446e-02  
 REMARK 3\_xyz: 0.656 0.002 0.041 13.908 0.002 3.902 4.0908e-02  
 REMARK 3\_adp: 0.656 0.002 0.041 13.908 0.002 3.902 4.0908e-02  
 REMARK 3\_occ: 0.656 0.002 0.041 13.908 0.002 3.902 4.0908e-02  
 REMARK 3\_bss: 0.656 0.002 0.041 13.908 0.002 3.902 4.0908e-02  
 REMARK 3\_ohs: 0.656 0.002 0.041 13.908 0.002 3.902 4.0908e-02

REMARK -----

REMARK Maximal deviations:

| REMARK | stage  | angl    | bond  | chir  | dihe   | plan  | repu  | grad       |
|--------|--------|---------|-------|-------|--------|-------|-------|------------|
| REMARK | 0      | : 6.852 | 0.116 | 0.280 | 91.738 | 0.018 | 1.316 | 3.8297e-02 |
| REMARK | 1_bss: | 6.852   | 0.116 | 0.280 | 91.738 | 0.018 | 1.316 | 3.8297e-02 |
| REMARK | 1_ohs: | 6.852   | 0.116 | 0.280 | 91.738 | 0.018 | 1.316 | 3.8297e-02 |
| REMARK | 1_fit: | 6.852   | 0.116 | 0.280 | 91.738 | 0.018 | 1.316 | 5.2815e-02 |
| REMARK | 1_xyz: | 5.508   | 0.026 | 0.129 | 91.065 | 0.017 | 2.108 | 3.3053e-02 |
| REMARK | 1_adp: | 5.508   | 0.026 | 0.129 | 91.065 | 0.017 | 2.108 | 3.3053e-02 |
| REMARK | 1_occ: | 5.508   | 0.026 | 0.129 | 91.065 | 0.017 | 2.108 | 3.3053e-02 |
| REMARK | 2_bss: | 5.508   | 0.026 | 0.129 | 91.065 | 0.017 | 2.108 | 3.3053e-02 |
| REMARK | 2_ohs: | 5.508   | 0.026 | 0.129 | 91.065 | 0.017 | 2.108 | 3.3053e-02 |
| REMARK | 2_fit: | 8.306   | 0.052 | 0.241 | 91.065 | 0.017 | 1.850 | 4.6556e-02 |
| REMARK | 2_xyz: | 5.410   | 0.027 | 0.133 | 90.888 | 0.017 | 2.064 | 1.8799e-02 |
| REMARK | 2_adp: | 5.410   | 0.027 | 0.133 | 90.888 | 0.017 | 2.064 | 1.8799e-02 |
| REMARK | 2_occ: | 5.410   | 0.027 | 0.133 | 90.888 | 0.017 | 2.064 | 1.8799e-02 |
| REMARK | 3_bss: | 5.410   | 0.027 | 0.133 | 90.888 | 0.017 | 2.064 | 1.8799e-02 |
| REMARK | 3_ohs: | 5.410   | 0.027 | 0.133 | 90.888 | 0.017 | 2.064 | 1.8799e-02 |
| REMARK | 3_fit: | 5.410   | 0.083 | 0.250 | 90.888 | 0.017 | 2.064 | 3.6263e-02 |
| REMARK | 3_xyz: | 5.267   | 0.026 | 0.126 | 90.712 | 0.016 | 2.006 | 1.8940e-02 |
| REMARK | 3_adp: | 5.267   | 0.026 | 0.126 | 90.712 | 0.016 | 2.006 | 1.8940e-02 |
| REMARK | 3_occ: | 5.267   | 0.026 | 0.126 | 90.712 | 0.016 | 2.006 | 1.8940e-02 |
| REMARK | 3_bss: | 5.267   | 0.026 | 0.126 | 90.712 | 0.016 | 2.006 | 1.8940e-02 |
| REMARK | 3_ohs: | 5.267   | 0.026 | 0.126 | 90.712 | 0.016 | 2.006 | 1.8940e-02 |

REMARK -----

| REMARK | stage  | b_max   | b_min | b_ave | b_max | b_min | b_ave | b_max | b_min | b_ave |
|--------|--------|---------|-------|-------|-------|-------|-------|-------|-------|-------|
| REMARK | 0      | : 67.43 | 4.93  | 17.60 | 67.43 | 6.78  | 17.44 | 37.19 | 4.93  | 20.17 |
| REMARK | 1_bss: | 67.43   | 4.93  | 17.60 | 67.43 | 6.78  | 17.44 | 37.19 | 4.93  | 20.17 |
| REMARK | 1_ohs: | 67.43   | 4.93  | 17.60 | 67.43 | 6.78  | 17.44 | 37.19 | 4.93  | 20.17 |
| REMARK | 1_fit: | 67.43   | 4.93  | 17.60 | 67.43 | 6.78  | 17.44 | 37.19 | 4.93  | 20.17 |
| REMARK | 1_xyz: | 67.43   | 4.93  | 17.60 | 67.43 | 6.78  | 17.44 | 37.19 | 4.93  | 20.17 |
| REMARK | 1_adp: | 62.33   | 5.73  | 17.38 | 62.33 | 6.94  | 17.27 | 37.22 | 5.73  | 19.13 |
| REMARK | 1_occ: | 62.33   | 5.73  | 17.38 | 62.33 | 6.94  | 17.27 | 37.22 | 5.73  | 19.13 |

REMARK 2\_bss: 62.33 5.73 17.38 62.33 6.94 17.27 37.22 5.73 19.13  
 REMARK 2\_ohs: 62.33 5.73 17.38 62.33 6.94 17.27 37.22 5.73 19.13  
 REMARK 2\_fit: 62.33 5.73 17.38 62.33 6.94 17.27 37.22 5.73 19.13  
 REMARK 2\_xyz: 62.33 5.73 17.38 62.33 6.94 17.27 37.22 5.73 19.13  
 REMARK 2\_adp: 77.20 5.51 17.10 77.20 7.22 17.00 37.20 5.51 18.74  
 REMARK 2\_occ: 77.20 5.51 17.10 77.20 7.22 17.00 37.20 5.51 18.74  
 REMARK 3\_bss: 77.20 5.51 17.10 77.20 7.22 17.00 37.20 5.51 18.74  
 REMARK 3\_ohs: 77.20 5.51 17.10 77.20 7.22 17.00 37.20 5.51 18.74  
 REMARK 3\_fit: 77.20 5.51 17.10 77.20 7.22 17.00 37.20 5.51 18.74  
 REMARK 3\_xyz: 77.20 5.51 17.10 77.20 7.22 17.00 37.20 5.51 18.74  
 REMARK 3\_adp: 77.77 5.27 16.93 77.77 6.48 16.84 37.33 5.27 18.42  
 REMARK 3\_occ: 77.77 5.27 16.93 77.77 6.48 16.84 37.33 5.27 18.42  
 REMARK 3\_bss: 77.77 5.27 16.93 77.77 6.48 16.84 37.33 5.27 18.42  
 REMARK 3\_ohs: 77.77 5.27 16.93 77.77 6.48 16.84 37.33 5.27 18.42

REMARK -----

REMARK stage      Deviation of refined  
 REMARK            model from start model  
 REMARK            max    min    mean  
 REMARK 0 : 0.000 0.000 0.000  
 REMARK 1\_bss: 0.000 0.000 0.000  
 REMARK 1\_ohs: 0.000 0.000 0.000  
 REMARK 1\_fit: 2.399 0.000 0.004  
 REMARK 1\_xyz: 2.543 0.001 0.018  
 REMARK 1\_adp: 2.543 0.001 0.017  
 REMARK 1\_occ: 2.543 0.001 0.017  
 REMARK 2\_bss: 2.543 0.001 0.017  
 REMARK 2\_ohs: 2.543 0.001 0.017  
 REMARK 2\_fit: 5.626 0.001 0.021  
 REMARK 2\_xyz: 5.609 0.001 0.030  
 REMARK 2\_adp: 5.609 0.001 0.028  
 REMARK 2\_occ: 5.609 0.001 0.028  
 REMARK 3\_bss: 5.609 0.001 0.028  
 REMARK 3\_ohs: 5.609 0.001 0.028  
 REMARK 3\_fit: 3.085 0.001 0.026  
 REMARK 3\_xyz: 3.086 0.001 0.035  
 REMARK 3\_adp: 3.086 0.001 0.034  
 REMARK 3\_occ: 3.086 0.001 0.034  
 REMARK 3\_bss: 3.086 0.001 0.034  
 REMARK 3\_ohs: 3.086 0.001 0.034

REMARK -----

REMARK MODEL CONTENT.

| REMARK | ELEMENT | ATOM RECORD COUNT | OCCUPANCY SUM |
|--------|---------|-------------------|---------------|
| REMARK | H       | 28                | 0.00          |
| REMARK | C       | 1398              | 1396.00       |
| REMARK | S       | 17                | 17.00         |
| REMARK | O       | 571               | 570.00        |

REMARK N 403 403.00  
 REMARK TOTAL 2417 2386.00  
 REMARK -----  
 REMARK r\_free\_flags.md5.hexdigest 07b90d280aaf381a55dfade0f7792dd2  
 REMARK  
 REMARK IF THIS FILE IS FOR PDB DEPOSITION: REMOVE ALL FROM THIS LINE UP.  
 REMARK 3  
 REMARK 3 REFINEMENT.  
 REMARK 3 PROGRAM : PHENIX (phenix.refine: 1.8\_1069)  
 REMARK 3 AUTHORS : Adams,Afonine,Chen,Davis,Echols,Gildea,Gopal,  
 REMARK 3 : Grosse-Kunstleve,Headd,Hung,Immormino,Ioerger,McCoy,  
 REMARK 3 : McKee,Moriarty,Pai,Read,Richardson,Richardson,Romo,  
 REMARK 3 : Sacchettini,Sauter,Smith,Storoni,Terwilliger,Zwart  
 REMARK 3  
 REMARK 3 REFINEMENT TARGET : ML  
 REMARK 3  
 REMARK 3 DATA USED IN REFINEMENT.  
 REMARK 3 RESOLUTION RANGE HIGH (ANGSTROMS) : 2.428  
 REMARK 3 RESOLUTION RANGE LOW (ANGSTROMS) : 27.771  
 REMARK 3 MIN(FOBS/SIGMA\_FOBS) : 1.40  
 REMARK 3 COMPLETENESS FOR RANGE (%) : 94.99  
 REMARK 3 NUMBER OF REFLECTIONS : 9401  
 REMARK 3 NUMBER OF REFLECTIONS (NON-ANOMALOUS) : 9401  
 REMARK 3  
 REMARK 3 FIT TO DATA USED IN REFINEMENT.  
 REMARK 3 R VALUE (WORKING + TEST SET) : 0.1765  
 REMARK 3 R VALUE (WORKING SET) : 0.1707  
 REMARK 3 FREE R VALUE : 0.2287  
 REMARK 3 FREE R VALUE TEST SET SIZE (%) : 10.00  
 REMARK 3 FREE R VALUE TEST SET COUNT : 940  
 REMARK 3  
 REMARK 3 FIT TO DATA USED IN REFINEMENT (IN BINS).  
 REMARK 3 BIN RESOLUTION RANGE COMPL. NWORK NFREE RWORK RFREE  
 REMARK 3 1 27.7729 - 4.6375 0.97 1273 141 0.1643 0.2017  
 REMARK 3 2 4.6375 - 3.6837 0.93 1199 133 0.1387 0.1950  
 REMARK 3 3 3.6837 - 3.2188 0.95 1191 132 0.1515 0.1972  
 REMARK 3 4 3.2188 - 2.9249 0.95 1205 134 0.2048 0.2668  
 REMARK 3 5 2.9249 - 2.7154 0.96 1214 136 0.1973 0.2904  
 REMARK 3 6 2.7154 - 2.5554 0.96 1203 134 0.2091 0.2542  
 REMARK 3 7 2.5554 - 2.4275 0.92 1176 130 0.2004 0.3021  
 REMARK 3  
 REMARK 3 BULK SOLVENT MODELLING.  
 REMARK 3 METHOD USED : FLAT BULK SOLVENT MODEL  
 REMARK 3 SOLVENT RADIUS : 1.11  
 REMARK 3 SHRINKAGE RADIUS : 0.90  
 REMARK 3 GRID STEP FACTOR : 4.00

REMARK 3  
 REMARK 3 ERROR ESTIMATES.  
 REMARK 3 COORDINATE ERROR (MAXIMUM-LIKELIHOOD BASED) : 0.26  
 REMARK 3 PHASE ERROR (DEGREES, MAXIMUM-LIKELIHOOD BASED) : 23.10  
 REMARK 3  
 REMARK 3 STRUCTURE FACTORS CALCULATION ALGORITHM : FFT  
 REMARK 3  
 REMARK 3 DEVIATIONS FROM IDEAL VALUES.  
 REMARK 3 RMSD MAX COUNT  
 REMARK 3 BOND : 0.002 0.026 2303  
 REMARK 3 ANGLE : 0.656 5.267 3143  
 REMARK 3 CHIRALITY : 0.041 0.126 329  
 REMARK 3 PLANARITY : 0.002 0.016 414  
 REMARK 3 DIHEDRAL : 13.908 90.712 840  
 REMARK 3 MIN NONBONDED DISTANCE : 2.006  
 REMARK 3  
 REMARK 3 MOLPROBITY STATISTICS.  
 REMARK 3 ALL-ATOM CLASHSCORE : 22.59  
 REMARK 3 RAMACHANDRAN PLOT:  
 REMARK 3 OUTLIERS : 0.00 %  
 REMARK 3 ALLOWED : 3.16 %  
 REMARK 3 FAVORED : 96.84 %  
 REMARK 3 ROTAMER OUTLIERS : 0.43 %  
 REMARK 3 CBETA DEVIATIONS : 0  
 REMARK 3  
 REMARK 3 ATOMIC DISPLACEMENT PARAMETERS.  
 REMARK 3 WILSON B : 28.42  
 REMARK 3 RMS(B\_ISO\_OR\_EQUIVALENT\_BONDED) : 3.06  
 REMARK 3 ATOMS NUMBER OF ATOMS  
 REMARK 3 ISO. ANISO.  
 REMARK 3 ALL : 2417 0  
 REMARK 3 ALL (NO H) : 2389 0  
 REMARK 3 SOLVENT : 143 0  
 REMARK 3 NON-SOLVENT : 2246 0  
 REMARK 3 HYDROGENS : 28 0  
 REMARK 3  
 CRYST1 38.470 51.521 67.238 90.00 101.27 90.00 P 1 21 1  
 SCALE1 0.025994 0.000000 0.005179 0.000000  
 SCALE2 0.000000 0.019410 0.000000 0.000000  
 SCALE3 0.000000 0.000000 0.015165 0.000000  
 ATOM 1 O VAL A 324 -18.771 24.761 -15.567 1.00 55.25 O  
 ATOM 2 N VAL A 324 -19.713 24.978 -18.948 1.00 50.49 N  
 ATOM 3 CA VAL A 324 -18.728 25.274 -17.915 1.00 43.26 C  
 ATOM 4 C VAL A 324 -18.904 24.344 -16.718 1.00 46.23 C  
 ATOM 5 CB VAL A 324 -18.825 26.742 -17.446 1.00 53.00 C  
 ATOM 6 CG1 VAL A 324 -20.117 26.972 -16.669 1.00 41.44 C

|      |    |               |         |        |         |      |       |   |
|------|----|---------------|---------|--------|---------|------|-------|---|
| ATOM | 7  | CG2 VAL A 324 | -17.612 | 27.117 | -16.605 | 1.00 | 57.21 | C |
| ATOM | 8  | N GLY A 325   | -19.202 | 23.079 | -16.995 | 1.00 | 34.53 | N |
| ATOM | 9  | CA GLY A 325  | -19.413 | 22.103 | -15.944 | 1.00 | 24.56 | C |
| ATOM | 10 | C GLY A 325   | -18.161 | 21.316 | -15.609 | 1.00 | 19.94 | C |
| ATOM | 11 | O GLY A 325   | -17.198 | 21.860 | -15.073 | 1.00 | 26.29 | O |
| ATOM | 12 | N ARG A 326   | -18.179 | 20.026 | -15.926 | 1.00 | 14.52 | N |
| ATOM | 13 | CA ARG A 326  | -17.056 | 19.148 | -15.626 | 1.00 | 14.91 | C |
| ATOM | 14 | C ARG A 326   | -16.035 | 19.162 | -16.755 | 1.00 | 13.51 | C |
| ATOM | 15 | O ARG A 326   | -16.381 | 19.348 | -17.920 | 1.00 | 14.92 | O |
| ATOM | 16 | CB ARG A 326  | -17.548 | 17.721 | -15.373 | 1.00 | 16.70 | C |
| ATOM | 17 | CG ARG A 326  | -18.604 | 17.623 | -14.281 | 1.00 | 13.55 | C |
| ATOM | 18 | CD ARG A 326  | -19.143 | 16.210 | -14.141 | 1.00 | 13.60 | C |
| ATOM | 19 | NE ARG A 326  | -18.788 | 15.622 | -12.852 | 1.00 | 20.32 | N |
| ATOM | 20 | CZ ARG A 326  | -18.105 | 14.491 | -12.707 | 1.00 | 22.67 | C |
| ATOM | 21 | NH1 ARG A 326 | -17.705 | 13.810 | -13.773 | 1.00 | 18.13 | N |
| ATOM | 22 | NH2 ARG A 326 | -17.826 | 14.036 | -11.491 | 1.00 | 25.61 | N |
| ATOM | 23 | N LEU A 327   | -14.772 | 18.970 | -16.399 | 1.00 | 12.04 | N |
| ATOM | 24 | CA LEU A 327  | -13.699 | 18.977 | -17.378 | 1.00 | 13.15 | C |
| ATOM | 25 | C LEU A 327   | -13.003 | 17.622 | -17.424 | 1.00 | 10.76 | C |
| ATOM | 26 | O LEU A 327   | -13.144 | 16.809 | -16.513 | 1.00 | 11.48 | O |
| ATOM | 27 | CB LEU A 327  | -12.690 | 20.073 | -17.042 | 1.00 | 11.39 | C |
| ATOM | 28 | CG LEU A 327  | -13.281 | 21.473 | -16.886 | 1.00 | 11.03 | C |
| ATOM | 29 | CD1 LEU A 327 | -12.208 | 22.461 | -16.466 | 1.00 | 9.94  | C |
| ATOM | 30 | CD2 LEU A 327 | -13.947 | 21.913 | -18.178 | 1.00 | 15.42 | C |
| ATOM | 31 | N ILE A 328   | -12.258 | 17.387 | -18.497 | 1.00 | 11.95 | N |
| ATOM | 32 | CA ILE A 328  | -11.474 | 16.169 | -18.635 | 1.00 | 10.15 | C |
| ATOM | 33 | C ILE A 328   | -10.016 | 16.468 | -18.315 | 1.00 | 9.41  | C |
| ATOM | 34 | O ILE A 328   | -9.373  | 17.268 | -18.994 | 1.00 | 8.30  | O |
| ATOM | 35 | CB ILE A 328  | -11.590 | 15.587 | -20.055 | 1.00 | 12.37 | C |
| ATOM | 36 | CG1 ILE A 328 | -13.039 | 15.179 | -20.339 | 1.00 | 10.42 | C |
| ATOM | 37 | CG2 ILE A 328 | -10.651 | 14.400 | -20.226 | 1.00 | 9.87  | C |
| ATOM | 38 | CD1 ILE A 328 | -13.284 | 14.718 | -21.761 | 1.00 | 10.20 | C |
| ATOM | 39 | N TYR A 329   | -9.500  | 15.827 | -17.272 | 1.00 | 10.45 | N |
| ATOM | 40 | CA TYR A 329  | -8.144  | 16.090 | -16.803 | 1.00 | 11.17 | C |
| ATOM | 41 | C TYR A 329   | -7.159  | 15.023 | -17.262 | 1.00 | 10.15 | C |
| ATOM | 42 | O TYR A 329   | -7.366  | 13.832 | -17.026 | 1.00 | 13.80 | O |
| ATOM | 43 | CB TYR A 329  | -8.118  | 16.175 | -15.274 | 1.00 | 11.51 | C |
| ATOM | 44 | CG TYR A 329  | -8.808  | 17.389 | -14.699 | 1.00 | 11.83 | C |
| ATOM | 45 | CD1 TYR A 329 | -10.186 | 17.413 | -14.519 | 1.00 | 15.44 | C |
| ATOM | 46 | CD2 TYR A 329 | -8.079  | 18.507 | -14.319 | 1.00 | 15.11 | C |
| ATOM | 47 | CE1 TYR A 329 | -10.818 | 18.523 | -13.985 | 1.00 | 9.96  | C |
| ATOM | 48 | CE2 TYR A 329 | -8.700  | 19.619 | -13.785 | 1.00 | 12.68 | C |
| ATOM | 49 | CZ TYR A 329  | -10.067 | 19.622 | -13.619 | 1.00 | 12.82 | C |
| ATOM | 50 | OH TYR A 329  | -10.679 | 20.733 | -13.086 | 1.00 | 15.22 | O |
| ATOM | 51 | N THR A 330   | -6.083  | 15.455 | -17.910 | 1.00 | 9.59  | N |
| ATOM | 52 | CA THR A 330  | -5.010  | 14.544 | -18.288 | 1.00 | 10.82 | C |



|      |    |     |     |   |     |        |        |         |      |       |   |
|------|----|-----|-----|---|-----|--------|--------|---------|------|-------|---|
| ATOM | 53 | C   | THR | A | 330 | -3.739 | 14.873 | -17.510 | 1.00 | 14.95 | C |
| ATOM | 54 | O   | THR | A | 330 | -3.315 | 16.028 | -17.452 | 1.00 | 14.93 | O |
| ATOM | 55 | CB  | THR | A | 330 | -4.726 | 14.577 | -19.803 | 1.00 | 13.69 | C |
| ATOM | 56 | OG1 | THR | A | 330 | -3.719 | 13.608 | -20.122 | 1.00 | 15.46 | O |
| ATOM | 57 | CG2 | THR | A | 330 | -4.250 | 15.954 | -20.236 | 1.00 | 15.62 | C |
| ATOM | 58 | N   | ALA | A | 331 | -3.140 | 13.851 | -16.906 | 1.00 | 11.95 | N |
| ATOM | 59 | CA  | ALA | A | 331 | -1.951 | 14.037 | -16.084 | 1.00 | 8.66  | C |
| ATOM | 60 | C   | ALA | A | 331 | -0.855 | 13.050 | -16.463 | 1.00 | 11.06 | C |
| ATOM | 61 | O   | ALA | A | 331 | -1.124 | 11.873 | -16.709 | 1.00 | 10.08 | O |
| ATOM | 62 | CB  | ALA | A | 331 | -2.302 | 13.897 | -14.610 | 1.00 | 10.26 | C |
| ATOM | 63 | N   | GLY | A | 332 | 0.382  | 13.535 | -16.505 | 1.00 | 8.71  | N |
| ATOM | 64 | CA  | GLY | A | 332 | 1.518  | 12.691 | -16.826 | 1.00 | 9.03  | C |
| ATOM | 65 | C   | GLY | A | 332 | 1.568  | 12.307 | -18.292 | 1.00 | 15.48 | C |
| ATOM | 66 | O   | GLY | A | 332 | 1.234  | 13.107 | -19.168 | 1.00 | 17.63 | O |
| ATOM | 67 | N   | GLY | A | 333 | 1.982  | 11.074 | -18.560 | 1.00 | 14.93 | N |
| ATOM | 68 | CA  | GLY | A | 333 | 2.136  | 10.604 | -19.923 | 1.00 | 13.90 | C |
| ATOM | 69 | C   | GLY | A | 333 | 3.601  | 10.442 | -20.274 | 1.00 | 16.44 | C |
| ATOM | 70 | O   | GLY | A | 333 | 4.472  | 10.635 | -19.423 | 1.00 | 13.02 | O |
| ATOM | 71 | N   | TYR | A | 334 | 3.879  | 10.092 | -21.526 | 1.00 | 16.04 | N |
| ATOM | 72 | CA  | TYR | A | 334 | 5.252  | 9.854  | -21.949 | 1.00 | 11.42 | C |
| ATOM | 73 | C   | TYR | A | 334 | 5.569  | 10.370 | -23.348 | 1.00 | 15.14 | C |
| ATOM | 74 | O   | TYR | A | 334 | 4.821  | 10.140 | -24.300 | 1.00 | 15.12 | O |
| ATOM | 75 | CB  | TYR | A | 334 | 5.591  | 8.365  | -21.871 | 1.00 | 12.72 | C |
| ATOM | 76 | CG  | TYR | A | 334 | 6.977  | 8.040  | -22.383 | 1.00 | 15.06 | C |
| ATOM | 77 | CD1 | TYR | A | 334 | 8.065  | 8.000  | -21.521 | 1.00 | 13.25 | C |
| ATOM | 78 | CD2 | TYR | A | 334 | 7.200  | 7.787  | -23.730 | 1.00 | 14.52 | C |
| ATOM | 79 | CE1 | TYR | A | 334 | 9.333  | 7.710  | -21.984 | 1.00 | 12.18 | C |
| ATOM | 80 | CE2 | TYR | A | 334 | 8.465  | 7.495  | -24.201 | 1.00 | 15.58 | C |
| ATOM | 81 | CZ  | TYR | A | 334 | 9.528  | 7.458  | -23.324 | 1.00 | 15.54 | C |
| ATOM | 82 | OH  | TYR | A | 334 | 10.791 | 7.170  | -23.789 | 1.00 | 17.47 | O |
| ATOM | 83 | N   | PHE | A | 335 | 6.691  | 11.073 | -23.454 | 1.00 | 14.20 | N |
| ATOM | 84 | CA  | PHE | A | 335 | 7.282  | 11.412 | -24.741 | 1.00 | 14.59 | C |
| ATOM | 85 | C   | PHE | A | 335 | 8.759  | 11.719 | -24.545 | 1.00 | 16.10 | C |
| ATOM | 86 | O   | PHE | A | 335 | 9.117  | 12.759 | -23.995 | 1.00 | 16.21 | O |
| ATOM | 87 | CB  | PHE | A | 335 | 6.570  | 12.591 | -25.402 | 1.00 | 11.94 | C |
| ATOM | 88 | CG  | PHE | A | 335 | 7.079  | 12.898 | -26.780 | 1.00 | 15.69 | C |
| ATOM | 89 | CD1 | PHE | A | 335 | 6.848  | 12.022 | -27.827 | 1.00 | 13.07 | C |
| ATOM | 90 | CD2 | PHE | A | 335 | 7.798  | 14.055 | -27.029 | 1.00 | 17.92 | C |
| ATOM | 91 | CE1 | PHE | A | 335 | 7.318  | 12.296 | -29.093 | 1.00 | 16.96 | C |
| ATOM | 92 | CE2 | PHE | A | 335 | 8.271  | 14.335 | -28.293 | 1.00 | 13.15 | C |
| ATOM | 93 | CZ  | PHE | A | 335 | 8.031  | 13.454 | -29.327 | 1.00 | 19.67 | C |
| ATOM | 94 | N   | ARG | A | 336 | 9.609  | 10.799 | -24.991 | 1.00 | 15.65 | N |
| ATOM | 95 | CA  | ARG | A | 336 | 11.043 | 10.875 | -24.733 | 1.00 | 18.93 | C |
| ATOM | 96 | C   | ARG | A | 336 | 11.336 | 10.567 | -23.267 | 1.00 | 15.38 | C |
| ATOM | 97 | O   | ARG | A | 336 | 12.335 | 9.927  | -22.942 | 1.00 | 14.43 | O |
| ATOM | 98 | CB  | ARG | A | 336 | 11.603 | 12.250 | -25.102 | 1.00 | 21.76 | C |

|      |     |     |     |   |     |        |        |         |      |       |   |
|------|-----|-----|-----|---|-----|--------|--------|---------|------|-------|---|
| ATOM | 99  | CG  | ARG | A | 336 | 13.110 | 12.346 | -24.916 | 1.00 | 28.40 | C |
| ATOM | 100 | CD  | ARG | A | 336 | 13.604 | 13.783 | -24.901 | 1.00 | 26.41 | C |
| ATOM | 101 | NE  | ARG | A | 336 | 15.016 | 13.848 | -24.532 | 1.00 | 27.31 | N |
| ATOM | 102 | CZ  | ARG | A | 336 | 15.939 | 14.525 | -25.207 | 1.00 | 25.17 | C |
| ATOM | 103 | NH1 | ARG | A | 336 | 15.602 | 15.209 | -26.292 | 1.00 | 33.45 | N |
| ATOM | 104 | NH2 | ARG | A | 336 | 17.199 | 14.520 | -24.795 | 1.00 | 24.39 | N |
| ATOM | 105 | N   | GLN | A | 337 | 10.454 | 11.032 | -22.388 | 1.00 | 15.33 | N |
| ATOM | 106 | CA  | GLN | A | 337 | 10.557 | 10.761 | -20.959 | 1.00 | 13.29 | C |
| ATOM | 107 | C   | GLN | A | 337 | 9.206  | 10.967 | -20.274 | 1.00 | 13.30 | C |
| ATOM | 108 | O   | GLN | A | 337 | 8.250  | 11.426 | -20.899 | 1.00 | 12.76 | O |
| ATOM | 109 | CB  | GLN | A | 337 | 11.631 | 11.645 | -20.319 | 1.00 | 14.98 | C |
| ATOM | 110 | CG  | GLN | A | 337 | 11.530 | 13.117 | -20.686 | 1.00 | 16.36 | C |
| ATOM | 111 | CD  | GLN | A | 337 | 12.758 | 13.909 | -20.270 | 1.00 | 26.78 | C |
| ATOM | 112 | OE1 | GLN | A | 337 | 13.494 | 13.508 | -19.366 | 1.00 | 26.61 | O |
| ATOM | 113 | NE2 | GLN | A | 337 | 12.990 | 15.035 | -20.937 | 1.00 | 25.73 | N |
| ATOM | 114 | N   | SER | A | 338 | 9.127  | 10.616 | -18.994 | 1.00 | 14.25 | N |
| ATOM | 115 | CA  | SER | A | 338 | 7.896  | 10.795 | -18.230 | 1.00 | 11.56 | C |
| ATOM | 116 | C   | SER | A | 338 | 7.526  | 12.272 | -18.143 | 1.00 | 12.53 | C |
| ATOM | 117 | O   | SER | A | 338 | 8.386  | 13.123 | -17.914 | 1.00 | 16.74 | O |
| ATOM | 118 | CB  | SER | A | 338 | 8.039  | 10.195 | -16.833 | 1.00 | 11.84 | C |
| ATOM | 119 | OG  | SER | A | 338 | 8.258  | 8.797  | -16.907 | 1.00 | 13.12 | O |
| ATOM | 120 | N   | LEU | A | 339 | 6.244  | 12.574 | -18.321 | 1.00 | 11.85 | N |
| ATOM | 121 | CA  | LEU | A | 339 | 5.798  | 13.960 | -18.424 | 1.00 | 12.56 | C |
| ATOM | 122 | C   | LEU | A | 339 | 5.126  | 14.465 | -17.153 | 1.00 | 11.09 | C |
| ATOM | 123 | O   | LEU | A | 339 | 4.658  | 13.681 | -16.328 | 1.00 | 12.32 | O |
| ATOM | 124 | CB  | LEU | A | 339 | 4.861  | 14.128 | -19.623 | 1.00 | 12.13 | C |
| ATOM | 125 | CG  | LEU | A | 339 | 5.443  | 13.688 | -20.968 | 1.00 | 11.78 | C |
| ATOM | 126 | CD1 | LEU | A | 339 | 4.424  | 13.864 | -22.086 | 1.00 | 13.29 | C |
| ATOM | 127 | CD2 | LEU | A | 339 | 6.726  | 14.448 | -21.275 | 1.00 | 8.05  | C |
| ATOM | 128 | N   | SER | A | 340 | 5.073  | 15.785 | -17.008 | 1.00 | 15.14 | N |
| ATOM | 129 | CA  | SER | A | 340 | 4.526  | 16.404 | -15.804 | 1.00 | 15.02 | C |
| ATOM | 130 | C   | SER | A | 340 | 3.236  | 17.169 | -16.070 | 1.00 | 13.03 | C |
| ATOM | 131 | O   | SER | A | 340 | 2.616  | 17.686 | -15.143 | 1.00 | 13.62 | O |
| ATOM | 132 | CB  | SER | A | 340 | 5.560  | 17.339 | -15.173 | 1.00 | 12.51 | C |
| ATOM | 133 | OG  | SER | A | 340 | 6.687  | 16.614 | -14.711 | 1.00 | 19.37 | O |
| ATOM | 134 | N   | TYR | A | 341 | 2.830  | 17.231 | -17.334 | 1.00 | 15.23 | N |
| ATOM | 135 | CA  | TYR | A | 341 | 1.676  | 18.033 | -17.733 | 1.00 | 13.04 | C |
| ATOM | 136 | C   | TYR | A | 341 | 0.385  | 17.639 | -17.020 | 1.00 | 12.53 | C |
| ATOM | 137 | O   | TYR | A | 341 | 0.066  | 16.456 | -16.888 | 1.00 | 17.14 | O |
| ATOM | 138 | CB  | TYR | A | 341 | 1.452  | 17.935 | -19.246 | 1.00 | 11.93 | C |
| ATOM | 139 | CG  | TYR | A | 341 | 2.685  | 18.182 | -20.085 | 1.00 | 14.52 | C |
| ATOM | 140 | CD1 | TYR | A | 341 | 3.645  | 19.106 | -19.695 | 1.00 | 17.44 | C |
| ATOM | 141 | CD2 | TYR | A | 341 | 2.888  | 17.485 | -21.269 | 1.00 | 14.40 | C |
| ATOM | 142 | CE1 | TYR | A | 341 | 4.774  | 19.330 | -20.465 | 1.00 | 18.98 | C |
| ATOM | 143 | CE2 | TYR | A | 341 | 4.010  | 17.701 | -22.043 | 1.00 | 13.77 | C |
| ATOM | 144 | CZ  | TYR | A | 341 | 4.950  | 18.623 | -21.639 | 1.00 | 19.87 | C |

|      |     |     |     |   |     |         |        |         |      |       |   |
|------|-----|-----|-----|---|-----|---------|--------|---------|------|-------|---|
| ATOM | 145 | OH  | TYR | A | 341 | 6.068   | 18.835 | -22.413 | 1.00 | 20.23 | O |
| ATOM | 146 | N   | LEU | A | 342 | -0.349  | 18.645 | -16.558 | 1.00 | 9.54  | N |
| ATOM | 147 | CA  | LEU | A | 342 | -1.745  | 18.474 | -16.177 | 1.00 | 11.91 | C |
| ATOM | 148 | C   | LEU | A | 342 | -2.557  | 19.453 | -17.012 | 1.00 | 12.37 | C |
| ATOM | 149 | O   | LEU | A | 342 | -2.300  | 20.657 | -16.993 | 1.00 | 11.27 | O |
| ATOM | 150 | CB  | LEU | A | 342 | -1.963  | 18.745 | -14.687 | 1.00 | 12.59 | C |
| ATOM | 151 | CG  | LEU | A | 342 | -3.428  | 18.714 | -14.231 | 1.00 | 7.60  | C |
| ATOM | 152 | CD1 | LEU | A | 342 | -4.010  | 17.311 | -14.342 | 1.00 | 6.89  | C |
| ATOM | 153 | CD2 | LEU | A | 342 | -3.584  | 19.251 | -12.813 | 1.00 | 9.40  | C |
| ATOM | 154 | N   | GLU | A | 343 | -3.526  | 18.935 | -17.757 | 1.00 | 10.38 | N |
| ATOM | 155 | CA  | GLU | A | 343 | -4.297  | 19.767 | -18.669 | 1.00 | 11.23 | C |
| ATOM | 156 | C   | GLU | A | 343 | -5.776  | 19.399 | -18.657 | 1.00 | 15.37 | C |
| ATOM | 157 | O   | GLU | A | 343 | -6.141  | 18.232 | -18.810 | 1.00 | 17.31 | O |
| ATOM | 158 | CB  | GLU | A | 343 | -3.724  | 19.674 | -20.087 | 1.00 | 10.02 | C |
| ATOM | 159 | CG  | GLU | A | 343 | -2.349  | 20.322 | -20.234 | 1.00 | 12.22 | C |
| ATOM | 160 | CD  | GLU | A | 343 | -1.719  | 20.081 | -21.594 | 1.00 | 10.76 | C |
| ATOM | 161 | OE1 | GLU | A | 343 | -1.383  | 18.918 | -21.900 | 1.00 | 18.01 | O |
| ATOM | 162 | OE2 | GLU | A | 343 | -1.555  | 21.055 | -22.357 | 1.00 | 9.76  | O |
| ATOM | 163 | N   | ALA | A | 344 | -6.623  | 20.404 | -18.467 | 1.00 | 12.48 | N |
| ATOM | 164 | CA  | ALA | A | 344 | -8.062  | 20.191 | -18.440 | 1.00 | 8.58  | C |
| ATOM | 165 | C   | ALA | A | 344 | -8.684  | 20.560 | -19.779 | 1.00 | 12.79 | C |
| ATOM | 166 | O   | ALA | A | 344 | -8.527  | 21.682 | -20.266 | 1.00 | 12.39 | O |
| ATOM | 167 | CB  | ALA | A | 344 | -8.697  | 20.992 | -17.317 | 1.00 | 8.32  | C |
| ATOM | 168 | N   | TYR | A | 345 | -9.383  | 19.602 | -20.375 | 1.00 | 13.43 | N |
| ATOM | 169 | CA  | TYR | A | 345 | -10.067 | 19.829 | -21.638 | 1.00 | 11.88 | C |
| ATOM | 170 | C   | TYR | A | 345 | -11.544 | 20.103 | -21.396 | 1.00 | 13.07 | C |
| ATOM | 171 | O   | TYR | A | 345 | -12.179 | 19.450 | -20.565 | 1.00 | 9.82  | O |
| ATOM | 172 | CB  | TYR | A | 345 | -9.893  | 18.631 | -22.575 | 1.00 | 11.12 | C |
| ATOM | 173 | CG  | TYR | A | 345 | -10.618 | 18.781 | -23.897 | 1.00 | 18.27 | C |
| ATOM | 174 | CD1 | TYR | A | 345 | -10.205 | 19.719 | -24.834 | 1.00 | 14.62 | C |
| ATOM | 175 | CD2 | TYR | A | 345 | -11.711 | 17.982 | -24.209 | 1.00 | 12.27 | C |
| ATOM | 176 | CE1 | TYR | A | 345 | -10.861 | 19.859 | -26.041 | 1.00 | 14.76 | C |
| ATOM | 177 | CE2 | TYR | A | 345 | -12.372 | 18.115 | -25.416 | 1.00 | 11.73 | C |
| ATOM | 178 | CZ  | TYR | A | 345 | -11.943 | 19.056 | -26.328 | 1.00 | 13.30 | C |
| ATOM | 179 | OH  | TYR | A | 345 | -12.596 | 19.199 | -27.532 | 1.00 | 15.46 | O |
| ATOM | 180 | N   | ASN | A | 346 | -12.075 | 21.082 | -22.121 | 1.00 | 11.88 | N |
| ATOM | 181 | CA  | ASN | A | 346 | -13.479 | 21.453 | -22.026 | 1.00 | 13.65 | C |
| ATOM | 182 | C   | ASN | A | 346 | -14.205 | 21.032 | -23.298 | 1.00 | 15.26 | C |
| ATOM | 183 | O   | ASN | A | 346 | -14.145 | 21.724 | -24.313 | 1.00 | 14.94 | O |
| ATOM | 184 | CB  | ASN | A | 346 | -13.607 | 22.964 | -21.807 | 1.00 | 17.97 | C |
| ATOM | 185 | CG  | ASN | A | 346 | -15.014 | 23.388 | -21.427 | 1.00 | 19.70 | C |
| ATOM | 186 | OD1 | ASN | A | 346 | -15.994 | 22.721 | -21.764 | 1.00 | 21.23 | O |
| ATOM | 187 | ND2 | ASN | A | 346 | -15.120 | 24.508 | -20.723 | 1.00 | 18.07 | N |
| ATOM | 188 | N   | PRO | A | 347 | -14.892 | 19.883 | -23.247 | 1.00 | 17.19 | N |
| ATOM | 189 | CA  | PRO | A | 347 | -15.503 | 19.267 | -24.430 | 1.00 | 16.38 | C |
| ATOM | 190 | C   | PRO | A | 347 | -16.465 | 20.196 | -25.161 | 1.00 | 17.91 | C |

|      |     |     |     |   |     |         |        |         |      |       |   |
|------|-----|-----|-----|---|-----|---------|--------|---------|------|-------|---|
| ATOM | 191 | O   | PRO | A | 347 | -16.550 | 20.135 | -26.387 | 1.00 | 20.11 | O |
| ATOM | 192 | CB  | PRO | A | 347 | -16.267 | 18.073 | -23.846 | 1.00 | 14.62 | C |
| ATOM | 193 | CG  | PRO | A | 347 | -15.570 | 17.771 | -22.559 | 1.00 | 13.28 | C |
| ATOM | 194 | CD  | PRO | A | 347 | -15.139 | 19.100 | -22.024 | 1.00 | 12.57 | C |
| ATOM | 195 | N   | SER | A | 348 | -17.173 | 21.043 | -24.422 | 1.00 | 16.19 | N |
| ATOM | 196 | CA  | SER | A | 348 | -18.182 | 21.915 | -25.018 | 1.00 | 19.46 | C |
| ATOM | 197 | C   | SER | A | 348 | -17.587 | 23.016 | -25.898 | 1.00 | 21.91 | C |
| ATOM | 198 | O   | SER | A | 348 | -18.022 | 23.205 | -27.034 | 1.00 | 25.08 | O |
| ATOM | 199 | CB  | SER | A | 348 | -19.087 | 22.518 | -23.939 | 1.00 | 16.94 | C |
| ATOM | 200 | OG  | SER | A | 348 | -18.323 | 23.101 | -22.900 | 1.00 | 30.01 | O |
| ATOM | 201 | N   | ASN | A | 349 | -16.599 | 23.741 | -25.383 | 1.00 | 20.12 | N |
| ATOM | 202 | CA  | ASN | A | 349 | -15.979 | 24.804 | -26.169 | 1.00 | 22.27 | C |
| ATOM | 203 | C   | ASN | A | 349 | -14.663 | 24.377 | -26.823 | 1.00 | 22.70 | C |
| ATOM | 204 | O   | ASN | A | 349 | -14.049 | 25.143 | -27.569 | 1.00 | 20.66 | O |
| ATOM | 205 | CB  | ASN | A | 349 | -15.811 | 26.085 | -25.347 | 1.00 | 19.45 | C |
| ATOM | 206 | CG  | ASN | A | 349 | -14.911 | 25.899 | -24.150 | 1.00 | 22.77 | C |
| ATOM | 207 | OD1 | ASN | A | 349 | -14.149 | 24.937 | -24.078 | 1.00 | 24.69 | O |
| ATOM | 208 | ND2 | ASN | A | 349 | -14.988 | 26.826 | -23.202 | 1.00 | 22.13 | N |
| ATOM | 209 | N   | GLY | A | 350 | -14.245 | 23.147 | -26.538 | 1.00 | 19.40 | N |
| ATOM | 210 | CA  | GLY | A | 350 | -13.127 | 22.523 | -27.226 | 1.00 | 15.64 | C |
| ATOM | 211 | C   | GLY | A | 350 | -11.751 | 23.076 | -26.904 | 1.00 | 16.72 | C |
| ATOM | 212 | O   | GLY | A | 350 | -10.840 | 22.994 | -27.727 | 1.00 | 17.83 | O |
| ATOM | 213 | N   | THR | A | 351 | -11.586 | 23.619 | -25.704 | 1.00 | 15.75 | N |
| ATOM | 214 | CA  | THR | A | 351 | -10.323 | 24.247 | -25.332 | 1.00 | 12.92 | C |
| ATOM | 215 | C   | THR | A | 351 | -9.535  | 23.463 | -24.282 | 1.00 | 13.33 | C |
| ATOM | 216 | O   | THR | A | 351 | -10.082 | 22.621 | -23.571 | 1.00 | 15.88 | O |
| ATOM | 217 | CB  | THR | A | 351 | -10.546 | 25.681 | -24.830 | 1.00 | 16.16 | C |
| ATOM | 218 | OG1 | THR | A | 351 | -11.502 | 25.669 | -23.763 | 1.00 | 19.23 | O |
| ATOM | 219 | CG2 | THR | A | 351 | -11.068 | 26.558 | -25.957 | 1.00 | 17.97 | C |
| ATOM | 220 | N   | TRP | A | 352 | -8.241  | 23.747 | -24.201 | 1.00 | 13.02 | N |
| ATOM | 221 | CA  | TRP | A | 352 | -7.373  | 23.130 | -23.209 | 1.00 | 14.09 | C |
| ATOM | 222 | C   | TRP | A | 352 | -6.848  | 24.172 | -22.230 | 1.00 | 14.48 | C |
| ATOM | 223 | O   | TRP | A | 352 | -6.487  | 25.280 | -22.628 | 1.00 | 13.54 | O |
| ATOM | 224 | CB  | TRP | A | 352 | -6.191  | 22.443 | -23.890 | 1.00 | 11.76 | C |
| ATOM | 225 | CG  | TRP | A | 352 | -6.539  | 21.168 | -24.586 | 1.00 | 11.41 | C |
| ATOM | 226 | CD1 | TRP | A | 352 | -6.861  | 21.015 | -25.901 | 1.00 | 11.53 | C |
| ATOM | 227 | CD2 | TRP | A | 352 | -6.584  | 19.859 | -24.005 | 1.00 | 9.90  | C |
| ATOM | 228 | NE1 | TRP | A | 352 | -7.108  | 19.691 | -26.176 | 1.00 | 13.48 | N |
| ATOM | 229 | CE2 | TRP | A | 352 | -6.946  | 18.962 | -25.029 | 1.00 | 13.05 | C |
| ATOM | 230 | CE3 | TRP | A | 352 | -6.358  | 19.360 | -22.718 | 1.00 | 10.97 | C |
| ATOM | 231 | CZ2 | TRP | A | 352 | -7.086  | 17.593 | -24.805 | 1.00 | 10.77 | C |
| ATOM | 232 | CZ3 | TRP | A | 352 | -6.498  | 18.002 | -22.499 | 1.00 | 10.50 | C |
| ATOM | 233 | CH2 | TRP | A | 352 | -6.858  | 17.135 | -23.537 | 1.00 | 10.65 | C |
| ATOM | 234 | N   | LEU | A | 353 | -6.799  | 23.811 | -20.951 | 1.00 | 12.67 | N |
| ATOM | 235 | CA  | LEU | A | 353 | -6.257  | 24.703 | -19.931 | 1.00 | 12.75 | C |
| ATOM | 236 | C   | LEU | A | 353 | -5.071  | 24.067 | -19.214 | 1.00 | 14.71 | C |

|      |     |     |           |        |        |         |      |       |   |
|------|-----|-----|-----------|--------|--------|---------|------|-------|---|
| ATOM | 237 | O   | LEU A 353 | -5.197 | 23.003 | -18.606 | 1.00 | 14.28 | O |
| ATOM | 238 | CB  | LEU A 353 | -7.335 | 25.090 | -18.917 | 1.00 | 14.71 | C |
| ATOM | 239 | CG  | LEU A 353 | -6.874 | 26.018 | -17.791 | 1.00 | 17.85 | C |
| ATOM | 240 | CD1 | LEU A 353 | -6.539 | 27.399 | -18.335 | 1.00 | 16.82 | C |
| ATOM | 241 | CD2 | LEU A 353 | -7.923 | 26.105 | -16.691 | 1.00 | 11.74 | C |
| ATOM | 242 | N   | ARG A 354 | -3.919 | 24.725 | -19.293 | 1.00 | 16.24 | N |
| ATOM | 243 | CA  | ARG A 354 | -2.710 | 24.246 | -18.634 | 1.00 | 11.59 | C |
| ATOM | 244 | C   | ARG A 354 | -2.776 | 24.528 | -17.138 | 1.00 | 11.50 | C |
| ATOM | 245 | O   | ARG A 354 | -2.969 | 25.670 | -16.722 | 1.00 | 11.84 | O |
| ATOM | 246 | CB  | ARG A 354 | -1.476 | 24.914 | -19.239 | 1.00 | 12.60 | C |
| ATOM | 247 | CG  | ARG A 354 | -0.155 | 24.441 | -18.655 | 1.00 | 12.98 | C |
| ATOM | 248 | CD  | ARG A 354 | 0.156  | 23.013 | -19.065 | 1.00 | 13.41 | C |
| ATOM | 249 | NE  | ARG A 354 | 1.445  | 22.566 | -18.542 | 1.00 | 18.31 | N |
| ATOM | 250 | CZ  | ARG A 354 | 2.617  | 22.858 | -19.097 | 1.00 | 18.88 | C |
| ATOM | 251 | NH1 | ARG A 354 | 2.668  | 23.605 | -20.191 | 1.00 | 12.75 | N |
| ATOM | 252 | NH2 | ARG A 354 | 3.741  | 22.409 | -18.554 | 1.00 | 16.64 | N |
| ATOM | 253 | N   | LEU A 355 | -2.618 | 23.482 | -16.334 | 1.00 | 10.40 | N |
| ATOM | 254 | CA  | LEU A 355 | -2.704 | 23.612 | -14.885 | 1.00 | 9.17  | C |
| ATOM | 255 | C   | LEU A 355 | -1.352 | 23.344 | -14.232 | 1.00 | 12.41 | C |
| ATOM | 256 | O   | LEU A 355 | -0.347 | 23.174 | -14.923 | 1.00 | 12.35 | O |
| ATOM | 257 | CB  | LEU A 355 | -3.766 | 22.662 | -14.331 | 1.00 | 10.66 | C |
| ATOM | 258 | CG  | LEU A 355 | -5.179 | 22.858 | -14.890 | 1.00 | 11.19 | C |
| ATOM | 259 | CD1 | LEU A 355 | -6.145 | 21.818 | -14.328 | 1.00 | 11.39 | C |
| ATOM | 260 | CD2 | LEU A 355 | -5.674 | 24.264 | -14.599 | 1.00 | 9.29  | C |
| ATOM | 261 | N   | ALA A 356 | -1.329 | 23.310 | -12.903 | 1.00 | 9.98  | N |
| ATOM | 262 | CA  | ALA A 356 | -0.089 | 23.086 | -12.164 | 1.00 | 8.88  | C |
| ATOM | 263 | C   | ALA A 356 | 0.534  | 21.738 | -12.507 | 1.00 | 11.59 | C |
| ATOM | 264 | O   | ALA A 356 | -0.152 | 20.716 | -12.540 | 1.00 | 11.24 | O |
| ATOM | 265 | CB  | ALA A 356 | -0.333 | 23.188 | -10.668 | 1.00 | 9.01  | C |
| ATOM | 266 | N   | ASP A 357 | 1.840  | 21.748 | -12.761 | 1.00 | 11.29 | N |
| ATOM | 267 | CA  | ASP A 357 | 2.577  | 20.533 | -13.092 | 1.00 | 12.36 | C |
| ATOM | 268 | C   | ASP A 357 | 2.557  | 19.518 | -11.953 | 1.00 | 13.40 | C |
| ATOM | 269 | O   | ASP A 357 | 2.433  | 19.882 | -10.781 | 1.00 | 10.14 | O |
| ATOM | 270 | CB  | ASP A 357 | 4.032  | 20.871 | -13.432 | 1.00 | 10.52 | C |
| ATOM | 271 | CG  | ASP A 357 | 4.214  | 21.313 | -14.872 | 1.00 | 13.01 | C |
| ATOM | 272 | OD1 | ASP A 357 | 3.202  | 21.539 | -15.569 | 1.00 | 13.70 | O |
| ATOM | 273 | OD2 | ASP A 357 | 5.379  | 21.439 | -15.304 | 1.00 | 13.83 | O |
| ATOM | 274 | N   | LEU A 358 | 2.674  | 18.243 | -12.307 | 1.00 | 11.64 | N |
| ATOM | 275 | CA  | LEU A 358 | 2.940  | 17.204 | -11.325 | 1.00 | 12.08 | C |
| ATOM | 276 | C   | LEU A 358 | 4.279  | 17.517 | -10.672 | 1.00 | 14.08 | C |
| ATOM | 277 | O   | LEU A 358 | 5.206  | 17.979 | -11.340 | 1.00 | 12.87 | O |
| ATOM | 278 | CB  | LEU A 358 | 3.010  | 15.831 | -11.996 | 1.00 | 10.88 | C |
| ATOM | 279 | CG  | LEU A 358 | 1.706  | 15.167 | -12.434 | 1.00 | 10.75 | C |
| ATOM | 280 | CD1 | LEU A 358 | 1.994  | 13.888 | -13.210 | 1.00 | 10.63 | C |
| ATOM | 281 | CD2 | LEU A 358 | 0.832  | 14.873 | -11.226 | 1.00 | 11.80 | C |
| ATOM | 282 | N   | GLN A 359 | 4.384  | 17.271 | -9.372  | 1.00 | 9.64  | N |

|      |     |     |           |        |        |         |      |       |   |
|------|-----|-----|-----------|--------|--------|---------|------|-------|---|
| ATOM | 283 | CA  | GLN A 359 | 5.632  | 17.523 | -8.666  | 1.00 | 11.95 | C |
| ATOM | 284 | C   | GLN A 359 | 6.683  | 16.513 | -9.109  | 1.00 | 11.45 | C |
| ATOM | 285 | O   | GLN A 359 | 7.885  | 16.763 | -9.017  | 1.00 | 13.72 | O |
| ATOM | 286 | CB  | GLN A 359 | 5.416  | 17.477 | -7.152  | 1.00 | 12.64 | C |
| ATOM | 287 | CG  | GLN A 359 | 4.367  | 18.465 | -6.666  | 1.00 | 11.02 | C |
| ATOM | 288 | CD  | GLN A 359 | 4.325  | 18.587 | -5.158  | 1.00 | 15.43 | C |
| ATOM | 289 | OE1 | GLN A 359 | 4.380  | 19.689 | -4.614  | 1.00 | 18.04 | O |
| ATOM | 290 | NE2 | GLN A 359 | 4.218  | 17.455 | -4.474  | 1.00 | 15.41 | N |
| ATOM | 291 | N   | VAL A 360 | 6.214  | 15.372 | -9.600  | 1.00 | 12.20 | N |
| ATOM | 292 | CA  | VAL A 360 | 7.085  | 14.352 | -10.167 | 1.00 | 10.59 | C |
| ATOM | 293 | C   | VAL A 360 | 6.474  | 13.827 | -11.460 | 1.00 | 13.44 | C |
| ATOM | 294 | O   | VAL A 360 | 5.329  | 13.372 | -11.468 | 1.00 | 13.87 | O |
| ATOM | 295 | CB  | VAL A 360 | 7.290  | 13.177 | -9.193  | 1.00 | 11.29 | C |
| ATOM | 296 | CG1 | VAL A 360 | 8.096  | 12.070 | -9.857  | 1.00 | 12.36 | C |
| ATOM | 297 | CG2 | VAL A 360 | 7.971  | 13.653 | -7.921  | 1.00 | 6.48  | C |
| ATOM | 298 | N   | PRO A 361 | 7.233  | 13.896 | -12.563 | 1.00 | 15.18 | N |
| ATOM | 299 | CA  | PRO A 361 | 6.746  | 13.391 | -13.851 | 1.00 | 12.98 | C |
| ATOM | 300 | C   | PRO A 361 | 6.584  | 11.874 | -13.812 | 1.00 | 13.45 | C |
| ATOM | 301 | O   | PRO A 361 | 7.436  | 11.179 | -13.256 | 1.00 | 13.62 | O |
| ATOM | 302 | CB  | PRO A 361 | 7.860  | 13.787 | -14.825 | 1.00 | 13.06 | C |
| ATOM | 303 | CG  | PRO A 361 | 9.086  | 13.882 | -13.977 | 1.00 | 13.60 | C |
| ATOM | 304 | CD  | PRO A 361 | 8.613  | 14.405 | -12.651 | 1.00 | 13.83 | C |
| ATOM | 305 | N   | ARG A 362 | 5.500  | 11.367 | -14.390 | 1.00 | 15.54 | N |
| ATOM | 306 | CA  | ARG A 362 | 5.245  | 9.932  | -14.374 | 1.00 | 13.62 | C |
| ATOM | 307 | C   | ARG A 362 | 4.464  | 9.479  | -15.597 | 1.00 | 11.55 | C |
| ATOM | 308 | O   | ARG A 362 | 3.532  | 10.150 | -16.037 | 1.00 | 10.18 | O |
| ATOM | 309 | CB  | ARG A 362 | 4.498  | 9.540  | -13.098 | 1.00 | 14.61 | C |
| ATOM | 310 | CG  | ARG A 362 | 4.914  | 10.359 | -11.887 | 1.00 | 17.96 | C |
| ATOM | 311 | CD  | ARG A 362 | 4.891  | 9.548  | -10.606 | 1.00 | 14.79 | C |
| ATOM | 312 | NE  | ARG A 362 | 3.543  | 9.329  | -10.091 | 1.00 | 13.64 | N |
| ATOM | 313 | CZ  | ARG A 362 | 2.834  | 10.249 | -9.447  | 1.00 | 18.54 | C |
| ATOM | 314 | NH1 | ARG A 362 | 3.338  | 11.462 | -9.261  | 1.00 | 22.08 | N |
| ATOM | 315 | NH2 | ARG A 362 | 1.618  | 9.963  | -8.998  | 1.00 | 13.89 | N |
| ATOM | 316 | N   | SER A 363 | 4.861  | 8.339  | -16.149 | 1.00 | 11.71 | N |
| ATOM | 317 | CA  | SER A 363 | 4.124  | 7.721  | -17.241 | 1.00 | 10.67 | C |
| ATOM | 318 | C   | SER A 363 | 3.538  | 6.408  | -16.750 | 1.00 | 12.76 | C |
| ATOM | 319 | O   | SER A 363 | 3.965  | 5.876  | -15.726 | 1.00 | 15.11 | O |
| ATOM | 320 | CB  | SER A 363 | 5.039  | 7.466  | -18.437 | 1.00 | 12.47 | C |
| ATOM | 321 | OG  | SER A 363 | 6.042  | 6.521  | -18.111 | 1.00 | 14.66 | O |
| ATOM | 322 | N   | GLY A 364 | 2.561  | 5.886  | -17.478 | 1.00 | 12.60 | N |
| ATOM | 323 | CA  | GLY A 364 | 1.935  | 4.634  | -17.102 | 1.00 | 12.14 | C |
| ATOM | 324 | C   | GLY A 364 | 1.291  | 4.708  | -15.732 | 1.00 | 10.08 | C |
| ATOM | 325 | O   | GLY A 364 | 1.216  | 3.707  | -15.019 | 1.00 | 11.79 | O |
| ATOM | 326 | N   | LEU A 365 | 0.835  | 5.900  | -15.361 | 1.00 | 8.54  | N |
| ATOM | 327 | CA  | LEU A 365 | 0.120  | 6.086  | -14.103 | 1.00 | 10.85 | C |
| ATOM | 328 | C   | LEU A 365 | -1.379 | 5.988  | -14.345 | 1.00 | 10.71 | C |

|      |     |     |           |         |        |         |      |       |   |
|------|-----|-----|-----------|---------|--------|---------|------|-------|---|
| ATOM | 329 | O   | LEU A 365 | -1.824  | 5.810  | -15.478 | 1.00 | 11.23 | O |
| ATOM | 330 | CB  | LEU A 365 | 0.443   | 7.447  | -13.485 | 1.00 | 9.42  | C |
| ATOM | 331 | CG  | LEU A 365 | -0.146  | 8.658  | -14.213 | 1.00 | 10.05 | C |
| ATOM | 332 | CD1 | LEU A 365 | -0.181  | 9.880  | -13.308 | 1.00 | 9.66  | C |
| ATOM | 333 | CD2 | LEU A 365 | 0.640   | 8.953  | -15.481 | 1.00 | 9.63  | C |
| ATOM | 334 | N   | ALA A 366 | -2.155  | 6.113  | -13.276 | 1.00 | 8.74  | N |
| ATOM | 335 | CA  | ALA A 366 | -3.606  | 6.106  | -13.386 | 1.00 | 11.60 | C |
| ATOM | 336 | C   | ALA A 366 | -4.198  | 7.318  | -12.681 | 1.00 | 9.67  | C |
| ATOM | 337 | O   | ALA A 366 | -3.662  | 7.787  | -11.681 | 1.00 | 10.28 | O |
| ATOM | 338 | CB  | ALA A 366 | -4.179  | 4.822  | -12.807 | 1.00 | 10.00 | C |
| ATOM | 339 | N   | GLY A 367 | -5.303  | 7.827  | -13.210 | 1.00 | 10.31 | N |
| ATOM | 340 | CA  | GLY A 367 | -6.000  | 8.928  | -12.574 | 1.00 | 10.69 | C |
| ATOM | 341 | C   | GLY A 367 | -7.359  | 8.504  | -12.053 | 1.00 | 11.49 | C |
| ATOM | 342 | O   | GLY A 367 | -7.927  | 7.510  | -12.503 | 1.00 | 12.51 | O |
| ATOM | 343 | N   | CYS A 368 | -7.876  | 9.252  | -11.088 | 1.00 | 9.13  | N |
| ATOM | 344 | CA  | CYS A 368 | -9.227  | 9.028  | -10.597 | 1.00 | 10.70 | C |
| ATOM | 345 | C   | CYS A 368 | -9.702  | 10.244 | -9.814  | 1.00 | 13.94 | C |
| ATOM | 346 | O   | CYS A 368 | -8.928  | 11.167 | -9.562  | 1.00 | 10.28 | O |
| ATOM | 347 | CB  | CYS A 368 | -9.303  | 7.762  | -9.738  | 1.00 | 11.65 | C |
| ATOM | 348 | SG  | CYS A 368 | -8.329  | 7.800  | -8.210  | 1.00 | 16.83 | S |
| ATOM | 349 | N   | VAL A 369 | -10.977 | 10.243 | -9.441  | 1.00 | 13.84 | N |
| ATOM | 350 | CA  | VAL A 369 | -11.558 | 11.368 | -8.722  | 1.00 | 12.41 | C |
| ATOM | 351 | C   | VAL A 369 | -12.384 | 10.917 | -7.528  | 1.00 | 12.27 | C |
| ATOM | 352 | O   | VAL A 369 | -13.214 | 10.014 | -7.633  | 1.00 | 11.26 | O |
| ATOM | 353 | CB  | VAL A 369 | -12.447 | 12.229 | -9.636  | 1.00 | 16.69 | C |
| ATOM | 354 | CG1 | VAL A 369 | -13.331 | 13.146 | -8.801  | 1.00 | 11.11 | C |
| ATOM | 355 | CG2 | VAL A 369 | -11.591 | 13.027 | -10.615 | 1.00 | 11.10 | C |
| ATOM | 356 | N   | VAL A 370 | -12.141 | 11.561 | -6.392  | 1.00 | 13.04 | N |
| ATOM | 357 | CA  | VAL A 370 | -12.895 | 11.310 | -5.175  | 1.00 | 12.72 | C |
| ATOM | 358 | C   | VAL A 370 | -13.161 | 12.639 | -4.481  | 1.00 | 13.12 | C |
| ATOM | 359 | O   | VAL A 370 | -12.233 | 13.392 | -4.191  | 1.00 | 13.66 | O |
| ATOM | 360 | CB  | VAL A 370 | -12.122 | 10.392 | -4.208  | 1.00 | 13.41 | C |
| ATOM | 361 | CG1 | VAL A 370 | -12.960 | 10.103 | -2.974  | 1.00 | 11.13 | C |
| ATOM | 362 | CG2 | VAL A 370 | -11.721 | 9.099  | -4.903  | 1.00 | 10.02 | C |
| ATOM | 363 | N   | GLY A 371 | -14.431 | 12.928 | -4.226  | 1.00 | 14.51 | N |
| ATOM | 364 | CA  | GLY A 371 | -14.806 | 14.159 | -3.555  | 1.00 | 16.57 | C |
| ATOM | 365 | C   | GLY A 371 | -14.254 | 15.401 | -4.226  | 1.00 | 16.85 | C |
| ATOM | 366 | O   | GLY A 371 | -13.677 | 16.265 | -3.569  | 1.00 | 24.30 | O |
| ATOM | 367 | N   | GLY A 372 | -14.428 | 15.487 | -5.541  | 1.00 | 17.30 | N |
| ATOM | 368 | CA  | GLY A 372 | -14.001 | 16.653 | -6.294  | 1.00 | 17.63 | C |
| ATOM | 369 | C   | GLY A 372 | -12.504 | 16.893 | -6.272  | 1.00 | 17.28 | C |
| ATOM | 370 | O   | GLY A 372 | -12.044 | 18.006 | -6.516  | 1.00 | 21.35 | O |
| ATOM | 371 | N   | LEU A 373 | -11.741 | 15.845 | -5.980  | 1.00 | 16.71 | N |
| ATOM | 372 | CA  | LEU A 373 | -10.286 | 15.932 | -5.957  | 1.00 | 12.64 | C |
| ATOM | 373 | C   | LEU A 373 | -9.664  | 14.958 | -6.952  | 1.00 | 13.58 | C |
| ATOM | 374 | O   | LEU A 373 | -10.133 | 13.831 | -7.111  | 1.00 | 12.68 | O |

|      |     |     |     |   |     |         |        |         |      |       |   |
|------|-----|-----|-----|---|-----|---------|--------|---------|------|-------|---|
| ATOM | 375 | CB  | LEU | A | 373 | -9.760  | 15.647 | -4.550  | 1.00 | 14.54 | C |
| ATOM | 376 | CG  | LEU | A | 373 | -9.371  | 16.848 | -3.686  | 1.00 | 18.43 | C |
| ATOM | 377 | CD1 | LEU | A | 373 | -10.378 | 17.976 | -3.827  | 1.00 | 16.51 | C |
| ATOM | 378 | CD2 | LEU | A | 373 | -9.250  | 16.418 | -2.234  | 1.00 | 17.17 | C |
| ATOM | 379 | N   | LEU | A | 374 | -8.603  | 15.393 | -7.618  | 1.00 | 12.99 | N |
| ATOM | 380 | CA  | LEU | A | 374 | -7.942  | 14.552 | -8.605  | 1.00 | 13.83 | C |
| ATOM | 381 | C   | LEU | A | 374 | -6.725  | 13.841 | -8.016  | 1.00 | 14.06 | C |
| ATOM | 382 | O   | LEU | A | 374 | -5.850  | 14.471 | -7.420  | 1.00 | 11.97 | O |
| ATOM | 383 | CB  | LEU | A | 374 | -7.529  | 15.380 | -9.821  | 1.00 | 13.10 | C |
| ATOM | 384 | CG  | LEU | A | 374 | -6.847  | 14.611 | -10.950 | 1.00 | 10.85 | C |
| ATOM | 385 | CD1 | LEU | A | 374 | -7.835  | 13.674 | -11.634 | 1.00 | 12.40 | C |
| ATOM | 386 | CD2 | LEU | A | 374 | -6.229  | 15.576 | -11.944 | 1.00 | 9.24  | C |
| ATOM | 387 | N   | TYR | A | 375 | -6.679  | 12.524 | -8.190  | 1.00 | 14.06 | N |
| ATOM | 388 | CA  | TYR | A | 375 | -5.568  | 11.720 | -7.698  | 1.00 | 12.63 | C |
| ATOM | 389 | C   | TYR | A | 375 | -4.761  | 11.116 | -8.841  | 1.00 | 13.02 | C |
| ATOM | 390 | O   | TYR | A | 375 | -5.325  | 10.648 | -9.829  | 1.00 | 12.66 | O |
| ATOM | 391 | CB  | TYR | A | 375 | -6.079  | 10.597 | -6.792  | 1.00 | 13.74 | C |
| ATOM | 392 | CG  | TYR | A | 375 | -6.644  | 11.070 | -5.473  | 1.00 | 13.64 | C |
| ATOM | 393 | CD1 | TYR | A | 375 | -7.998  | 11.347 | -5.334  | 1.00 | 11.21 | C |
| ATOM | 394 | CD2 | TYR | A | 375 | -5.824  | 11.235 | -4.366  | 1.00 | 10.61 | C |
| ATOM | 395 | CE1 | TYR | A | 375 | -8.516  | 11.777 | -4.130  | 1.00 | 10.20 | C |
| ATOM | 396 | CE2 | TYR | A | 375 | -6.333  | 11.664 | -3.160  | 1.00 | 15.11 | C |
| ATOM | 397 | CZ  | TYR | A | 375 | -7.680  | 11.933 | -3.045  | 1.00 | 13.42 | C |
| ATOM | 398 | OH  | TYR | A | 375 | -8.188  | 12.360 | -1.840  | 1.00 | 14.28 | O |
| ATOM | 399 | N   | ALA | A | 376 | -3.439  | 11.135 | -8.695  | 1.00 | 12.80 | N |
| ATOM | 400 | CA  | ALA | A | 376 | -2.539  | 10.453 | -9.616  | 1.00 | 10.85 | C |
| ATOM | 401 | C   | ALA | A | 376 | -1.825  | 9.331  | -8.867  | 1.00 | 13.41 | C |
| ATOM | 402 | O   | ALA | A | 376 | -1.240  | 9.563  | -7.807  | 1.00 | 11.62 | O |
| ATOM | 403 | CB  | ALA | A | 376 | -1.533  | 11.430 | -10.193 | 1.00 | 12.12 | C |
| ATOM | 404 | N   | VAL | A | 377 | -1.869  | 8.120  | -9.416  | 1.00 | 12.93 | N |
| ATOM | 405 | CA  | VAL | A | 377 | -1.354  | 6.949  | -8.712  | 1.00 | 10.83 | C |
| ATOM | 406 | C   | VAL | A | 377 | -0.242  | 6.232  | -9.469  | 1.00 | 10.53 | C |
| ATOM | 407 | O   | VAL | A | 377 | -0.315  | 6.058  | -10.685 | 1.00 | 11.89 | O |
| ATOM | 408 | CB  | VAL | A | 377 | -2.471  | 5.928  | -8.441  | 1.00 | 11.81 | C |
| ATOM | 409 | CG1 | VAL | A | 377 | -2.118  | 5.074  | -7.233  | 1.00 | 9.40  | C |
| ATOM | 410 | CG2 | VAL | A | 377 | -3.801  | 6.635  | -8.232  | 1.00 | 13.27 | C |
| ATOM | 411 | N   | GLY | A | 378 | 0.779   | 5.802  | -8.734  | 1.00 | 13.42 | N |
| ATOM | 412 | CA  | GLY | A | 378 | 1.858   | 5.007  | -9.296  | 1.00 | 11.59 | C |
| ATOM | 413 | C   | GLY | A | 378 | 2.422   | 5.557  | -10.591 | 1.00 | 11.60 | C |
| ATOM | 414 | O   | GLY | A | 378 | 2.455   | 6.768  | -10.803 | 1.00 | 12.26 | O |
| ATOM | 415 | N   | GLY | A | 379 | 2.870   | 4.659  | -11.461 | 1.00 | 12.44 | N |
| ATOM | 416 | CA  | GLY | A | 379 | 3.457   | 5.051  | -12.726 | 1.00 | 10.53 | C |
| ATOM | 417 | C   | GLY | A | 379 | 4.964   | 4.888  | -12.728 | 1.00 | 13.84 | C |
| ATOM | 418 | O   | GLY | A | 379 | 5.520   | 4.110  | -11.949 | 1.00 | 12.59 | O |
| ATOM | 419 | N   | ARG | A | 380 | 5.628   | 5.630  | -13.608 | 1.00 | 12.48 | N |
| ATOM | 420 | CA  | ARG | A | 380 | 7.079   | 5.583  | -13.713 | 1.00 | 12.32 | C |



|      |     |     |     |   |     |        |        |         |      |       |   |
|------|-----|-----|-----|---|-----|--------|--------|---------|------|-------|---|
| ATOM | 421 | C   | ARG | A | 380 | 7.651  | 6.989  | -13.852 | 1.00 | 11.30 | C |
| ATOM | 422 | O   | ARG | A | 380 | 7.293  | 7.725  | -14.769 | 1.00 | 14.35 | O |
| ATOM | 423 | CB  | ARG | A | 380 | 7.502  | 4.727  | -14.907 | 1.00 | 15.11 | C |
| ATOM | 424 | CG  | ARG | A | 380 | 9.005  | 4.509  | -15.011 | 1.00 | 16.24 | C |
| ATOM | 425 | CD  | ARG | A | 380 | 9.362  | 3.693  | -16.241 | 1.00 | 13.60 | C |
| ATOM | 426 | NE  | ARG | A | 380 | 9.164  | 4.453  | -17.471 | 1.00 | 18.90 | N |
| ATOM | 427 | CZ  | ARG | A | 380 | 9.287  | 3.943  | -18.692 | 1.00 | 18.73 | C |
| ATOM | 428 | NH1 | ARG | A | 380 | 9.603  | 2.665  | -18.851 | 1.00 | 15.36 | N |
| ATOM | 429 | NH2 | ARG | A | 380 | 9.089  | 4.711  | -19.756 | 1.00 | 16.31 | N |
| ATOM | 430 | N   | ASN | A | 381 | 8.542  | 7.356  | -12.937 | 1.00 | 10.27 | N |
| ATOM | 431 | CA  | ASN | A | 381 | 9.166  | 8.670  | -12.966 | 1.00 | 12.57 | C |
| ATOM | 432 | C   | ASN | A | 381 | 10.458 | 8.673  | -13.781 | 1.00 | 15.42 | C |
| ATOM | 433 | O   | ASN | A | 381 | 10.777 | 7.698  | -14.461 | 1.00 | 11.36 | O |
| ATOM | 434 | CB  | ASN | A | 381 | 9.432  | 9.170  | -11.544 | 1.00 | 11.16 | C |
| ATOM | 435 | CG  | ASN | A | 381 | 10.345 | 8.244  | -10.760 | 1.00 | 15.31 | C |
| ATOM | 436 | OD1 | ASN | A | 381 | 11.245 | 7.617  | -11.321 | 1.00 | 13.08 | O |
| ATOM | 437 | ND2 | ASN | A | 381 | 10.110 | 8.147  | -9.456  | 1.00 | 9.73  | N |
| ATOM | 438 | N   | ASN | A | 382 | 11.195 | 9.777  | -13.710 | 1.00 | 14.35 | N |
| ATOM | 439 | CA  | ASN | A | 382 | 12.454 | 9.904  | -14.433 | 1.00 | 14.09 | C |
| ATOM | 440 | C   | ASN | A | 382 | 13.659 | 9.865  | -13.500 | 1.00 | 11.59 | C |
| ATOM | 441 | O   | ASN | A | 382 | 14.693 | 10.467 | -13.783 | 1.00 | 13.17 | O |
| ATOM | 442 | CB  | ASN | A | 382 | 12.470 | 11.197 | -15.251 | 1.00 | 10.70 | C |
| ATOM | 443 | CG  | ASN | A | 382 | 11.487 | 11.170 | -16.404 | 1.00 | 11.99 | C |
| ATOM | 444 | OD1 | ASN | A | 382 | 11.247 | 10.124 | -17.003 | 1.00 | 16.59 | O |
| ATOM | 445 | ND2 | ASN | A | 382 | 10.917 | 12.324 | -16.724 | 1.00 | 8.98  | N |
| ATOM | 446 | N   | SER | A | 383 | 13.520 | 9.149  | -12.389 | 1.00 | 12.94 | N |
| ATOM | 447 | CA  | SER | A | 383 | 14.576 | 9.086  | -11.382 | 1.00 | 16.19 | C |
| ATOM | 448 | C   | SER | A | 383 | 15.866 | 8.489  | -11.939 | 1.00 | 15.12 | C |
| ATOM | 449 | O   | SER | A | 383 | 15.848 | 7.444  | -12.589 | 1.00 | 16.40 | O |
| ATOM | 450 | CB  | SER | A | 383 | 14.110 | 8.299  | -10.157 | 1.00 | 17.32 | C |
| ATOM | 451 | OG  | SER | A | 383 | 15.105 | 8.304  | -9.149  | 1.00 | 19.90 | O |
| ATOM | 452 | N   | PRO | A | 384 | 16.994 | 9.160  | -11.674 | 1.00 | 16.98 | N |
| ATOM | 453 | CA  | PRO | A | 384 | 18.315 | 8.829  | -12.220 | 1.00 | 19.06 | C |
| ATOM | 454 | C   | PRO | A | 384 | 19.043 | 7.724  | -11.457 | 1.00 | 17.94 | C |
| ATOM | 455 | O   | PRO | A | 384 | 20.179 | 7.410  | -11.807 | 1.00 | 21.45 | O |
| ATOM | 456 | CB  | PRO | A | 384 | 19.098 | 10.144 | -12.063 | 1.00 | 16.26 | C |
| ATOM | 457 | CG  | PRO | A | 384 | 18.098 | 11.173 | -11.569 | 1.00 | 18.64 | C |
| ATOM | 458 | CD  | PRO | A | 384 | 17.026 | 10.400 | -10.888 | 1.00 | 13.70 | C |
| ATOM | 459 | N   | ASP | A | 385 | 18.410 | 7.147  | -10.441 | 1.00 | 18.74 | N |
| ATOM | 460 | CA  | ASP | A | 385 | 19.101 | 6.202  | -9.563  | 1.00 | 19.94 | C |
| ATOM | 461 | C   | ASP | A | 385 | 18.766 | 4.734  | -9.828  | 1.00 | 21.24 | C |
| ATOM | 462 | O   | ASP | A | 385 | 19.255 | 3.851  | -9.125  | 1.00 | 26.29 | O |
| ATOM | 463 | CB  | ASP | A | 385 | 18.829 | 6.540  | -8.095  | 1.00 | 19.21 | C |
| ATOM | 464 | CG  | ASP | A | 385 | 17.383 | 6.308  | -7.701  | 1.00 | 22.88 | C |
| ATOM | 465 | OD1 | ASP | A | 385 | 16.552 | 6.055  | -8.599  | 1.00 | 22.14 | O |
| ATOM | 466 | OD2 | ASP | A | 385 | 17.076 | 6.383  | -6.493  | 1.00 | 22.93 | O |

|      |     |     |     |   |     |        |        |         |      |       |   |
|------|-----|-----|-----|---|-----|--------|--------|---------|------|-------|---|
| ATOM | 467 | N   | GLY | A | 386 | 17.935 | 4.473  | -10.832 | 1.00 | 20.01 | N |
| ATOM | 468 | CA  | GLY | A | 386 | 17.559 | 3.108  | -11.161 | 1.00 | 22.13 | C |
| ATOM | 469 | C   | GLY | A | 386 | 16.208 | 2.695  | -10.603 | 1.00 | 21.59 | C |
| ATOM | 470 | O   | GLY | A | 386 | 15.685 | 1.638  | -10.955 | 1.00 | 20.17 | O |
| ATOM | 471 | N   | ASN | A | 387 | 15.649 | 3.527  | -9.727  | 1.00 | 18.11 | N |
| ATOM | 472 | CA  | ASN | A | 387 | 14.322 | 3.290  | -9.167  | 1.00 | 21.34 | C |
| ATOM | 473 | C   | ASN | A | 387 | 13.271 | 4.203  | -9.784  | 1.00 | 17.01 | C |
| ATOM | 474 | O   | ASN | A | 387 | 12.903 | 5.213  | -9.187  | 1.00 | 18.17 | O |
| ATOM | 475 | CB  | ASN | A | 387 | 14.330 | 3.516  | -7.654  | 1.00 | 24.34 | C |
| ATOM | 476 | CG  | ASN | A | 387 | 14.936 | 2.363  | -6.894  | 1.00 | 26.68 | C |
| ATOM | 477 | OD1 | ASN | A | 387 | 15.920 | 2.529  | -6.173  | 1.00 | 30.61 | O |
| ATOM | 478 | ND2 | ASN | A | 387 | 14.346 | 1.182  | -7.042  | 1.00 | 28.34 | N |
| ATOM | 479 | N   | THR | A | 388 | 12.779 | 3.847  | -10.967 | 1.00 | 16.04 | N |
| ATOM | 480 | CA  | THR | A | 388 | 11.813 | 4.693  | -11.668 | 1.00 | 16.85 | C |
| ATOM | 481 | C   | THR | A | 388 | 10.367 | 4.282  | -11.411 | 1.00 | 15.26 | C |
| ATOM | 482 | O   | THR | A | 388 | 9.439  | 5.033  | -11.715 | 1.00 | 13.68 | O |
| ATOM | 483 | CB  | THR | A | 388 | 12.067 | 4.720  | -13.184 | 1.00 | 11.61 | C |
| ATOM | 484 | OG1 | THR | A | 388 | 12.006 | 3.387  | -13.703 | 1.00 | 12.12 | O |
| ATOM | 485 | CG2 | THR | A | 388 | 13.432 | 5.316  | -13.479 | 1.00 | 13.41 | C |
| ATOM | 486 | N   | ASP | A | 389 | 10.177 | 3.088  | -10.859 | 1.00 | 13.78 | N |
| ATOM | 487 | CA  | ASP | A | 389 | 8.841  | 2.617  | -10.511 | 1.00 | 13.10 | C |
| ATOM | 488 | C   | ASP | A | 389 | 8.289  | 3.403  | -9.321  | 1.00 | 14.29 | C |
| ATOM | 489 | O   | ASP | A | 389 | 8.931  | 3.502  | -8.274  | 1.00 | 15.83 | O |
| ATOM | 490 | CB  | ASP | A | 389 | 8.855  | 1.115  | -10.214 | 1.00 | 15.32 | C |
| ATOM | 491 | CG  | ASP | A | 389 | 8.997  | 0.273  | -11.469 | 1.00 | 14.98 | C |
| ATOM | 492 | OD1 | ASP | A | 389 | 8.483  | 0.690  | -12.528 | 1.00 | 13.71 | O |
| ATOM | 493 | OD2 | ASP | A | 389 | 9.620  | -0.808 | -11.399 | 1.00 | 17.83 | O |
| ATOM | 494 | N   | SER | A | 390 | 7.096  | 3.962  | -9.489  | 1.00 | 13.36 | N |
| ATOM | 495 | CA  | SER | A | 390 | 6.521  | 4.845  | -8.480  | 1.00 | 12.47 | C |
| ATOM | 496 | C   | SER | A | 390 | 5.563  | 4.122  | -7.538  | 1.00 | 11.21 | C |
| ATOM | 497 | O   | SER | A | 390 | 4.835  | 3.220  | -7.945  | 1.00 | 12.02 | O |
| ATOM | 498 | CB  | SER | A | 390 | 5.808  | 6.024  | -9.153  | 1.00 | 14.19 | C |
| ATOM | 499 | OG  | SER | A | 390 | 5.210  | 6.882  | -8.194  | 1.00 | 15.51 | O |
| ATOM | 500 | N   | SER | A | 391 | 5.575  | 4.524  | -6.271  | 1.00 | 11.70 | N |
| ATOM | 501 | CA  | SER | A | 391 | 4.603  | 4.032  | -5.304  | 1.00 | 14.13 | C |
| ATOM | 502 | C   | SER | A | 391 | 3.839  | 5.217  | -4.726  | 1.00 | 12.42 | C |
| ATOM | 503 | O   | SER | A | 391 | 3.192  | 5.107  | -3.684  | 1.00 | 14.15 | O |
| ATOM | 504 | CB  | SER | A | 391 | 5.294  | 3.254  | -4.185  | 1.00 | 10.52 | C |
| ATOM | 505 | OG  | SER | A | 391 | 6.127  | 4.104  | -3.419  | 1.00 | 9.09  | O |
| ATOM | 506 | N   | ALA | A | 392 | 3.914  | 6.347  | -5.422  | 1.00 | 10.73 | N |
| ATOM | 507 | CA  | ALA | A | 392 | 3.363  | 7.601  | -4.921  | 1.00 | 13.57 | C |
| ATOM | 508 | C   | ALA | A | 392 | 1.875  | 7.765  | -5.210  | 1.00 | 11.43 | C |
| ATOM | 509 | O   | ALA | A | 392 | 1.351  | 7.222  | -6.183  | 1.00 | 8.47  | O |
| ATOM | 510 | CB  | ALA | A | 392 | 4.145  | 8.783  | -5.487  | 1.00 | 9.45  | C |
| ATOM | 511 | N   | LEU | A | 393 | 1.205  | 8.516  | -4.342  | 1.00 | 9.59  | N |
| ATOM | 512 | CA  | LEU | A | 393 | -0.173 | 8.934  | -4.563  | 1.00 | 11.71 | C |

|      |     |     |     |   |     |         |        |         |      |       |   |
|------|-----|-----|-----|---|-----|---------|--------|---------|------|-------|---|
| ATOM | 513 | C   | LEU | A | 393 | -0.241  | 10.440 | -4.360  | 1.00 | 14.83 | C |
| ATOM | 514 | O   | LEU | A | 393 | 0.158   | 10.945 | -3.310  | 1.00 | 12.75 | O |
| ATOM | 515 | CB  | LEU | A | 393 | -1.117  | 8.238  | -3.584  | 1.00 | 12.04 | C |
| ATOM | 516 | CG  | LEU | A | 393 | -2.580  | 8.684  | -3.653  | 1.00 | 12.99 | C |
| ATOM | 517 | CD1 | LEU | A | 393 | -3.192  | 8.311  | -4.992  | 1.00 | 12.97 | C |
| ATOM | 518 | CD2 | LEU | A | 393 | -3.392  | 8.095  | -2.503  | 1.00 | 16.50 | C |
| ATOM | 519 | N   | ASP | A | 394 | -0.737  | 11.157 | -5.363  | 1.00 | 12.47 | N |
| ATOM | 520 | CA  | ASP | A | 394 | -0.773  | 12.615 | -5.298  | 1.00 | 13.17 | C |
| ATOM | 521 | C   | ASP | A | 394 | -2.167  | 13.192 | -5.540  | 1.00 | 12.09 | C |
| ATOM | 522 | O   | ASP | A | 394 | -2.916  | 12.715 | -6.395  | 1.00 | 9.22  | O |
| ATOM | 523 | CB  | ASP | A | 394 | 0.238   | 13.221 | -6.274  | 1.00 | 12.32 | C |
| ATOM | 524 | CG  | ASP | A | 394 | 1.666   | 12.839 | -5.940  | 1.00 | 12.81 | C |
| ATOM | 525 | OD1 | ASP | A | 394 | 2.214   | 13.390 | -4.962  | 1.00 | 11.61 | O |
| ATOM | 526 | OD2 | ASP | A | 394 | 2.242   | 11.991 | -6.655  | 1.00 | 13.99 | O |
| ATOM | 527 | N   | CYS | A | 395 | -2.496  | 14.234 | -4.783  | 1.00 | 12.82 | N |
| ATOM | 528 | CA  | CYS | A | 395 | -3.825  | 14.830 | -4.816  | 1.00 | 13.33 | C |
| ATOM | 529 | C   | CYS | A | 395 | -3.796  | 16.232 | -5.420  | 1.00 | 11.56 | C |
| ATOM | 530 | O   | CYS | A | 395 | -2.970  | 17.063 | -5.044  | 1.00 | 10.65 | O |
| ATOM | 531 | CB  | CYS | A | 395 | -4.404  | 14.882 | -3.400  | 1.00 | 12.67 | C |
| ATOM | 532 | SG  | CYS | A | 395 | -6.170  | 15.227 | -3.318  | 1.00 | 16.03 | S |
| ATOM | 533 | N   | TYR | A | 396 | -4.701  | 16.490 | -6.360  | 1.00 | 11.91 | N |
| ATOM | 534 | CA  | TYR | A | 396 | -4.799  | 17.809 | -6.977  | 1.00 | 11.78 | C |
| ATOM | 535 | C   | TYR | A | 396 | -6.126  | 18.489 | -6.663  | 1.00 | 12.70 | C |
| ATOM | 536 | O   | TYR | A | 396 | -7.199  | 17.933 | -6.916  | 1.00 | 13.57 | O |
| ATOM | 537 | CB  | TYR | A | 396 | -4.609  | 17.730 | -8.493  | 1.00 | 10.25 | C |
| ATOM | 538 | CG  | TYR | A | 396 | -4.805  | 19.062 | -9.178  | 1.00 | 8.62  | C |
| ATOM | 539 | CD1 | TYR | A | 396 | -3.778  | 19.995 | -9.225  | 1.00 | 8.80  | C |
| ATOM | 540 | CD2 | TYR | A | 396 | -6.017  | 19.392 | -9.768  | 1.00 | 7.97  | C |
| ATOM | 541 | CE1 | TYR | A | 396 | -3.950  | 21.217 | -9.844  | 1.00 | 11.64 | C |
| ATOM | 542 | CE2 | TYR | A | 396 | -6.199  | 20.616 | -10.395 | 1.00 | 9.41  | C |
| ATOM | 543 | CZ  | TYR | A | 396 | -5.162  | 21.524 | -10.428 | 1.00 | 10.54 | C |
| ATOM | 544 | OH  | TYR | A | 396 | -5.329  | 22.744 | -11.047 | 1.00 | 8.00  | O |
| ATOM | 545 | N   | ASN | A | 397 | -6.042  | 19.698 | -6.116  | 1.00 | 10.80 | N |
| ATOM | 546 | CA  | ASN | A | 397 | -7.224  | 20.478 | -5.776  | 1.00 | 11.25 | C |
| ATOM | 547 | C   | ASN | A | 397 | -7.455  | 21.570 | -6.811  | 1.00 | 9.68  | C |
| ATOM | 548 | O   | ASN | A | 397 | -6.732  | 22.564 | -6.842  | 1.00 | 13.33 | O |
| ATOM | 549 | CB  | ASN | A | 397 | -7.075  | 21.089 | -4.382  | 1.00 | 10.43 | C |
| ATOM | 550 | CG  | ASN | A | 397 | -8.375  | 21.665 | -3.849  | 1.00 | 14.51 | C |
| ATOM | 551 | OD1 | ASN | A | 397 | -9.311  | 21.930 | -4.604  | 1.00 | 15.41 | O |
| ATOM | 552 | ND2 | ASN | A | 397 | -8.435  | 21.865 | -2.537  | 1.00 | 16.71 | N |
| ATOM | 553 | N   | PRO | A | 398 | -8.464  | 21.378 | -7.670  | 1.00 | 13.18 | N |
| ATOM | 554 | CA  | PRO | A | 398 | -8.799  | 22.303 | -8.760  | 1.00 | 15.87 | C |
| ATOM | 555 | C   | PRO | A | 398 | -9.048  | 23.708 | -8.241  | 1.00 | 14.68 | C |
| ATOM | 556 | O   | PRO | A | 398 | -8.764  | 24.683 | -8.932  | 1.00 | 12.89 | O |
| ATOM | 557 | CB  | PRO | A | 398 | -10.110 | 21.733 | -9.307  | 1.00 | 10.27 | C |
| ATOM | 558 | CG  | PRO | A | 398 | -10.087 | 20.295 | -8.936  | 1.00 | 10.03 | C |

|      |     |     |     |   |     |         |        |         |      |       |   |
|------|-----|-----|-----|---|-----|---------|--------|---------|------|-------|---|
| ATOM | 559 | CD  | PRO | A | 398 | -9.383  | 20.228 | -7.616  | 1.00 | 10.89 | C |
| ATOM | 560 | N   | MET | A | 399 | -9.584  | 23.807 | -7.031  | 1.00 | 14.94 | N |
| ATOM | 561 | CA  | MET | A | 399 | -9.959  | 25.107 | -6.494  | 1.00 | 18.08 | C |
| ATOM | 562 | C   | MET | A | 399 | -8.750  | 25.966 | -6.149  | 1.00 | 15.59 | C |
| ATOM | 563 | O   | MET | A | 399 | -8.824  | 27.190 | -6.160  | 1.00 | 22.87 | O |
| ATOM | 564 | CB  | MET | A | 399 | -10.865 | 24.959 | -5.276  | 1.00 | 23.10 | C |
| ATOM | 565 | CG  | MET | A | 399 | -11.585 | 26.251 | -4.938  | 1.00 | 36.84 | C |
| ATOM | 566 | SD  | MET | A | 399 | -12.409 | 26.245 | -3.339  | 1.00 | 77.77 | S |
| ATOM | 567 | CE  | MET | A | 399 | -13.448 | 24.795 | -3.497  | 1.00 | 55.26 | C |
| ATOM | 568 | N   | THR | A | 400 | -7.632  | 25.316 | -5.855  | 1.00 | 17.69 | N |
| ATOM | 569 | CA  | THR | A | 400 | -6.434  | 26.026 | -5.424  | 1.00 | 16.08 | C |
| ATOM | 570 | C   | THR | A | 400 | -5.271  | 25.799 | -6.387  | 1.00 | 16.61 | C |
| ATOM | 571 | O   | THR | A | 400 | -4.215  | 26.419 | -6.262  | 1.00 | 14.26 | O |
| ATOM | 572 | CB  | THR | A | 400 | -5.997  | 25.582 | -4.022  | 1.00 | 14.21 | C |
| ATOM | 573 | OG1 | THR | A | 400 | -5.664  | 24.190 | -4.053  | 1.00 | 14.60 | O |
| ATOM | 574 | CG2 | THR | A | 400 | -7.117  | 25.809 | -3.014  | 1.00 | 13.80 | C |
| ATOM | 575 | N   | ASN | A | 401 | -5.464  | 24.894 | -7.339  | 1.00 | 11.82 | N |
| ATOM | 576 | CA  | ASN | A | 401 | -4.412  | 24.564 | -8.290  | 1.00 | 10.16 | C |
| ATOM | 577 | C   | ASN | A | 401 | -3.163  | 24.051 | -7.581  | 1.00 | 12.38 | C |
| ATOM | 578 | O   | ASN | A | 401 | -2.040  | 24.311 | -8.015  | 1.00 | 11.90 | O |
| ATOM | 579 | CB  | ASN | A | 401 | -4.062  | 25.784 | -9.140  | 1.00 | 10.27 | C |
| ATOM | 580 | CG  | ASN | A | 401 | -3.262  | 25.423 | -10.374 | 1.00 | 12.31 | C |
| ATOM | 581 | OD1 | ASN | A | 401 | -3.531  | 24.414 | -11.032 | 1.00 | 15.76 | O |
| ATOM | 582 | ND2 | ASN | A | 401 | -2.265  | 26.240 | -10.691 | 1.00 | 7.44  | N |
| ATOM | 583 | N   | GLN | A | 402 | -3.369  | 23.322 | -6.488  | 1.00 | 11.23 | N |
| ATOM | 584 | CA  | GLN | A | 402 | -2.273  | 22.778 | -5.696  | 1.00 | 9.67  | C |
| ATOM | 585 | C   | GLN | A | 402 | -2.223  | 21.259 | -5.760  | 1.00 | 12.48 | C |
| ATOM | 586 | O   | GLN | A | 402 | -3.241  | 20.588 | -5.599  | 1.00 | 13.60 | O |
| ATOM | 587 | CB  | GLN | A | 402 | -2.410  | 23.202 | -4.233  | 1.00 | 10.26 | C |
| ATOM | 588 | CG  | GLN | A | 402 | -2.011  | 24.637 | -3.949  | 1.00 | 13.14 | C |
| ATOM | 589 | CD  | GLN | A | 402 | -0.529  | 24.875 | -4.142  | 1.00 | 12.94 | C |
| ATOM | 590 | OE1 | GLN | A | 402 | 0.182   | 24.031 | -4.689  | 1.00 | 14.40 | O |
| ATOM | 591 | NE2 | GLN | A | 402 | -0.053  | 26.029 | -3.692  | 1.00 | 11.68 | N |
| ATOM | 592 | N   | TRP | A | 403 | -1.031  | 20.722 | -5.992  | 1.00 | 11.13 | N |
| ATOM | 593 | CA  | TRP | A | 403 | -0.800  | 19.292 | -5.847  | 1.00 | 11.62 | C |
| ATOM | 594 | C   | TRP | A | 403 | -0.377  | 18.989 | -4.413  | 1.00 | 12.26 | C |
| ATOM | 595 | O   | TRP | A | 403 | 0.349   | 19.768 | -3.794  | 1.00 | 14.06 | O |
| ATOM | 596 | CB  | TRP | A | 403 | 0.282   | 18.818 | -6.814  | 1.00 | 10.92 | C |
| ATOM | 597 | CG  | TRP | A | 403 | -0.212  | 18.530 | -8.194  | 1.00 | 8.63  | C |
| ATOM | 598 | CD1 | TRP | A | 403 | -0.079  | 19.323 | -9.295  | 1.00 | 7.97  | C |
| ATOM | 599 | CD2 | TRP | A | 403 | -0.907  | 17.356 | -8.627  | 1.00 | 9.03  | C |
| ATOM | 600 | NE1 | TRP | A | 403 | -0.650  | 18.717 | -10.387 | 1.00 | 9.39  | N |
| ATOM | 601 | CE2 | TRP | A | 403 | -1.166  | 17.507 | -10.003 | 1.00 | 10.84 | C |
| ATOM | 602 | CE3 | TRP | A | 403 | -1.341  | 16.193 | -7.983  | 1.00 | 10.25 | C |
| ATOM | 603 | CZ2 | TRP | A | 403 | -1.838  | 16.539 | -10.746 | 1.00 | 12.08 | C |
| ATOM | 604 | CZ3 | TRP | A | 403 | -2.007  | 15.233 | -8.723  | 1.00 | 11.04 | C |

|      |     |     |     |       |        |        |         |      |       |   |
|------|-----|-----|-----|-------|--------|--------|---------|------|-------|---|
| ATOM | 605 | CH2 | TRP | A 403 | -2.249 | 15.412 | -10.089 | 1.00 | 9.53  | C |
| ATOM | 606 | N   | SER | A 404 | -0.832 | 17.859 | -3.885  | 1.00 | 10.68 | N |
| ATOM | 607 | CA  | SER | A 404 | -0.469 | 17.464 | -2.528  | 1.00 | 13.74 | C |
| ATOM | 608 | C   | SER | A 404 | -0.103 | 15.992 | -2.451  | 1.00 | 12.15 | C |
| ATOM | 609 | O   | SER | A 404 | -0.891 | 15.131 | -2.840  | 1.00 | 14.55 | O |
| ATOM | 610 | CB  | SER | A 404 | -1.602 | 17.772 | -1.544  | 1.00 | 13.68 | C |
| ATOM | 611 | OG  | SER | A 404 | -1.520 | 19.106 | -1.081  | 1.00 | 18.66 | O |
| ATOM | 612 | N   | PRO | A 405 | 1.107  | 15.701 | -1.954  | 1.00 | 14.78 | N |
| ATOM | 613 | CA  | PRO | A 405 | 1.538  | 14.315 | -1.761  | 1.00 | 14.24 | C |
| ATOM | 614 | C   | PRO | A 405 | 0.647  | 13.625 | -0.742  | 1.00 | 13.30 | C |
| ATOM | 615 | O   | PRO | A 405 | 0.270  | 14.240 | 0.255   | 1.00 | 13.68 | O |
| ATOM | 616 | CB  | PRO | A 405 | 2.958  | 14.465 | -1.202  | 1.00 | 13.01 | C |
| ATOM | 617 | CG  | PRO | A 405 | 3.407  | 15.816 | -1.653  | 1.00 | 12.75 | C |
| ATOM | 618 | CD  | PRO | A 405 | 2.172  | 16.664 | -1.627  | 1.00 | 13.87 | C |
| ATOM | 619 | N   | CYS | A 406 | 0.304  | 12.368 | -1.001  | 1.00 | 11.80 | N |
| ATOM | 620 | CA  | CYS | A 406 | -0.469 | 11.572 | -0.059  | 1.00 | 12.67 | C |
| ATOM | 621 | C   | CYS | A 406 | 0.374  | 10.413 | 0.456   | 1.00 | 14.80 | C |
| ATOM | 622 | O   | CYS | A 406 | 1.551  | 10.289 | 0.119   | 1.00 | 18.04 | O |
| ATOM | 623 | CB  | CYS | A 406 | -1.741 | 11.038 | -0.720  | 1.00 | 14.32 | C |
| ATOM | 624 | SG  | CYS | A 406 | -2.971 | 12.300 | -1.126  | 1.00 | 13.23 | S |
| ATOM | 625 | N   | ALA | A 407 | -0.229 | 9.565  | 1.280   | 1.00 | 11.64 | N |
| ATOM | 626 | CA  | ALA | A 407 | 0.447  | 8.364  | 1.737   | 1.00 | 15.07 | C |
| ATOM | 627 | C   | ALA | A 407 | 0.762  | 7.487  | 0.531   | 1.00 | 17.77 | C |
| ATOM | 628 | O   | ALA | A 407 | -0.111 | 7.236  | -0.300  | 1.00 | 16.20 | O |
| ATOM | 629 | CB  | ALA | A 407 | -0.421 | 7.614  | 2.732   | 1.00 | 13.30 | C |
| ATOM | 630 | N   | PRO | A 408 | 2.018  | 7.026  | 0.426   | 1.00 | 15.91 | N |
| ATOM | 631 | CA  | PRO | A 408 | 2.434  | 6.173  | -0.690  | 1.00 | 9.55  | C |
| ATOM | 632 | C   | PRO | A 408 | 1.898  | 4.755  | -0.530  | 1.00 | 13.05 | C |
| ATOM | 633 | O   | PRO | A 408 | 1.588  | 4.341  | 0.588   | 1.00 | 10.29 | O |
| ATOM | 634 | CB  | PRO | A 408 | 3.957  | 6.174  | -0.571  | 1.00 | 10.64 | C |
| ATOM | 635 | CG  | PRO | A 408 | 4.210  | 6.352  | 0.891   | 1.00 | 9.03  | C |
| ATOM | 636 | CD  | PRO | A 408 | 3.116  | 7.269  | 1.380   | 1.00 | 13.42 | C |
| ATOM | 637 | N   | MET | A 409 | 1.791  | 4.029  | -1.639  | 1.00 | 13.07 | N |
| ATOM | 638 | CA  | MET | A 409 | 1.300  | 2.656  | -1.625  | 1.00 | 9.29  | C |
| ATOM | 639 | C   | MET | A 409 | 2.311  | 1.733  | -0.949  | 1.00 | 11.13 | C |
| ATOM | 640 | O   | MET | A 409 | 3.421  | 2.154  | -0.621  | 1.00 | 9.36  | O |
| ATOM | 641 | CB  | MET | A 409 | 1.001  | 2.182  | -3.052  | 1.00 | 8.50  | C |
| ATOM | 642 | CG  | MET | A 409 | -0.148 | 2.924  | -3.730  | 1.00 | 9.29  | C |
| ATOM | 643 | SD  | MET | A 409 | -0.341 | 2.548  | -5.492  | 1.00 | 13.48 | S |
| ATOM | 644 | CE  | MET | A 409 | 1.226  | 3.131  | -6.142  | 1.00 | 9.07  | C |
| ATOM | 645 | N   | SER | A 410 | 1.924  | 0.477  | -0.738  | 1.00 | 9.48  | N |
| ATOM | 646 | CA  | SER | A 410 | 2.790  | -0.490 | -0.066  | 1.00 | 10.95 | C |
| ATOM | 647 | C   | SER | A 410 | 3.938  | -0.949 | -0.961  | 1.00 | 10.61 | C |
| ATOM | 648 | O   | SER | A 410 | 4.952  | -1.445 | -0.475  | 1.00 | 11.35 | O |
| ATOM | 649 | CB  | SER | A 410 | 1.985  | -1.701 | 0.413   | 1.00 | 9.45  | C |
| ATOM | 650 | OG  | SER | A 410 | 1.520  | -2.472 | -0.680  | 1.00 | 10.61 | O |

|      |     |     |           |        |        |         |      |       |   |
|------|-----|-----|-----------|--------|--------|---------|------|-------|---|
| ATOM | 651 | N   | VAL A 411 | 3.767  | -0.784 | -2.269  | 1.00 | 12.76 | N |
| ATOM | 652 | CA  | VAL A 411 | 4.787  | -1.162 | -3.241  | 1.00 | 9.62  | C |
| ATOM | 653 | C   | VAL A 411 | 4.670  | -0.287 | -4.482  | 1.00 | 12.80 | C |
| ATOM | 654 | O   | VAL A 411 | 3.598  | 0.251  | -4.764  | 1.00 | 9.08  | O |
| ATOM | 655 | CB  | VAL A 411 | 4.636  | -2.629 | -3.674  | 1.00 | 10.97 | C |
| ATOM | 656 | CG1 | VAL A 411 | 4.717  | -3.554 | -2.469  | 1.00 | 8.10  | C |
| ATOM | 657 | CG2 | VAL A 411 | 3.321  | -2.826 | -4.415  | 1.00 | 10.07 | C |
| ATOM | 658 | N   | PRO A 412 | 5.777  | -0.138 | -5.227  | 1.00 | 12.56 | N |
| ATOM | 659 | CA  | PRO A 412 | 5.756  | 0.605  | -6.491  | 1.00 | 12.24 | C |
| ATOM | 660 | C   | PRO A 412 | 4.889  | -0.118 | -7.515  | 1.00 | 13.04 | C |
| ATOM | 661 | O   | PRO A 412 | 4.962  | -1.344 | -7.620  | 1.00 | 13.45 | O |
| ATOM | 662 | CB  | PRO A 412 | 7.223  | 0.585  | -6.935  | 1.00 | 14.43 | C |
| ATOM | 663 | CG  | PRO A 412 | 8.005  | 0.287  | -5.694  | 1.00 | 8.88  | C |
| ATOM | 664 | CD  | PRO A 412 | 7.129  | -0.608 | -4.883  | 1.00 | 10.54 | C |
| ATOM | 665 | N   | ARG A 413 | 4.077  | 0.629  | -8.256  | 1.00 | 11.07 | N |
| ATOM | 666 | CA  | ARG A 413 | 3.181  | 0.032  | -9.239  | 1.00 | 9.95  | C |
| ATOM | 667 | C   | ARG A 413 | 3.197  | 0.805  | -10.553 | 1.00 | 11.68 | C |
| ATOM | 668 | O   | ARG A 413 | 2.497  | 1.806  | -10.702 | 1.00 | 9.81  | O |
| ATOM | 669 | CB  | ARG A 413 | 1.753  | -0.031 | -8.693  | 1.00 | 10.20 | C |
| ATOM | 670 | CG  | ARG A 413 | 1.607  | -0.810 | -7.392  | 1.00 | 11.36 | C |
| ATOM | 671 | CD  | ARG A 413 | 0.165  | -0.798 | -6.907  | 1.00 | 11.79 | C |
| ATOM | 672 | NE  | ARG A 413 | -0.019 | -1.579 | -5.686  | 1.00 | 10.62 | N |
| ATOM | 673 | CZ  | ARG A 413 | -0.286 | -2.882 | -5.664  | 1.00 | 13.34 | C |
| ATOM | 674 | NH1 | ARG A 413 | -0.396 | -3.561 | -6.798  | 1.00 | 9.63  | N |
| ATOM | 675 | NH2 | ARG A 413 | -0.438 | -3.511 | -4.505  | 1.00 | 10.91 | N |
| ATOM | 676 | N   | ASN A 414 | 4.003  | 0.336  | -11.501 | 1.00 | 12.32 | N |
| ATOM | 677 | CA  | ASN A 414 | 4.031  | 0.917  | -12.838 | 1.00 | 13.98 | C |
| ATOM | 678 | C   | ASN A 414 | 3.030  | 0.212  | -13.742 | 1.00 | 12.47 | C |
| ATOM | 679 | O   | ASN A 414 | 2.723  | -0.961 | -13.535 | 1.00 | 14.37 | O |
| ATOM | 680 | CB  | ASN A 414 | 5.434  | 0.826  | -13.441 | 1.00 | 13.18 | C |
| ATOM | 681 | CG  | ASN A 414 | 5.528  | 1.500  | -14.798 | 1.00 | 16.60 | C |
| ATOM | 682 | OD1 | ASN A 414 | 4.848  | 2.494  | -15.060 | 1.00 | 14.07 | O |
| ATOM | 683 | ND2 | ASN A 414 | 6.372  | 0.957  | -15.671 | 1.00 | 16.81 | N |
| ATOM | 684 | N   | ARG A 415 | 2.530  | 0.925  | -14.745 | 1.00 | 10.16 | N |
| ATOM | 685 | CA  | ARG A 415 | 1.516  | 0.370  | -15.632 | 1.00 | 12.46 | C |
| ATOM | 686 | C   | ARG A 415 | 0.336  | -0.089 | -14.790 | 1.00 | 11.24 | C |
| ATOM | 687 | O   | ARG A 415 | -0.120 | -1.228 | -14.885 | 1.00 | 12.63 | O |
| ATOM | 688 | CB  | ARG A 415 | 2.102  | -0.772 | -16.460 | 1.00 | 13.81 | C |
| ATOM | 689 | CG  | ARG A 415 | 3.221  | -0.304 | -17.383 | 1.00 | 15.23 | C |
| ATOM | 690 | CD  | ARG A 415 | 3.913  | -1.449 | -18.093 | 1.00 | 16.74 | C |
| ATOM | 691 | NE  | ARG A 415 | 5.013  | -0.969 | -18.924 | 1.00 | 19.31 | N |
| ATOM | 692 | CZ  | ARG A 415 | 5.873  | -1.760 | -19.557 | 1.00 | 22.24 | C |
| ATOM | 693 | NH1 | ARG A 415 | 5.767  | -3.078 | -19.455 | 1.00 | 24.89 | N |
| ATOM | 694 | NH2 | ARG A 415 | 6.843  | -1.232 | -20.291 | 1.00 | 22.84 | N |
| ATOM | 695 | N   | ILE A 416 | -0.154 | 0.840  | -13.976 | 1.00 | 11.50 | N |
| ATOM | 696 | CA  | ILE A 416 | -1.142 | 0.572  | -12.942 | 1.00 | 11.46 | C |

|      |     |     |     |   |     |         |        |         |      |       |   |
|------|-----|-----|-----|---|-----|---------|--------|---------|------|-------|---|
| ATOM | 697 | C   | ILE | A | 416 | -2.581  | 0.734  | -13.433 | 1.00 | 10.92 | C |
| ATOM | 698 | O   | ILE | A | 416 | -2.838  | 1.386  | -14.447 | 1.00 | 11.52 | O |
| ATOM | 699 | CB  | ILE | A | 416 | -0.912  | 1.525  | -11.747 | 1.00 | 9.96  | C |
| ATOM | 700 | CG1 | ILE | A | 416 | -1.763  | 1.124  | -10.541 | 1.00 | 10.35 | C |
| ATOM | 701 | CG2 | ILE | A | 416 | -1.191  | 2.963  | -12.151 | 1.00 | 8.58  | C |
| ATOM | 702 | CD1 | ILE | A | 416 | -1.537  | 2.011  | -9.328  | 1.00 | 8.03  | C |
| ATOM | 703 | N   | GLY | A | 417 | -3.513  | 0.128  | -12.703 | 1.00 | 10.13 | N |
| ATOM | 704 | CA  | GLY | A | 417 | -4.933  | 0.288  | -12.960 | 1.00 | 9.56  | C |
| ATOM | 705 | C   | GLY | A | 417 | -5.643  | 0.716  | -11.689 | 1.00 | 12.01 | C |
| ATOM | 706 | O   | GLY | A | 417 | -5.330  | 0.225  | -10.604 | 1.00 | 10.48 | O |
| ATOM | 707 | N   | VAL | A | 418 | -6.595  | 1.636  | -11.816 | 1.00 | 12.65 | N |
| ATOM | 708 | CA  | VAL | A | 418 | -7.268  | 2.192  | -10.646 | 1.00 | 11.72 | C |
| ATOM | 709 | C   | VAL | A | 418 | -8.783  | 2.198  | -10.787 | 1.00 | 13.03 | C |
| ATOM | 710 | O   | VAL | A | 418 | -9.318  | 2.351  | -11.885 | 1.00 | 15.92 | O |
| ATOM | 711 | CB  | VAL | A | 418 | -6.793  | 3.631  | -10.352 | 1.00 | 9.23  | C |
| ATOM | 712 | CG1 | VAL | A | 418 | -7.737  | 4.312  | -9.380  | 1.00 | 14.51 | C |
| ATOM | 713 | CG2 | VAL | A | 418 | -5.374  | 3.622  | -9.809  | 1.00 | 10.94 | C |
| ATOM | 714 | N   | GLY | A | 419 | -9.467  | 2.033  | -9.661  | 1.00 | 10.59 | N |
| ATOM | 715 | CA  | GLY | A | 419 | -10.916 | 2.078  | -9.625  | 1.00 | 11.99 | C |
| ATOM | 716 | C   | GLY | A | 419 | -11.392 | 2.588  | -8.280  | 1.00 | 11.46 | C |
| ATOM | 717 | O   | GLY | A | 419 | -10.756 | 2.344  | -7.257  | 1.00 | 11.21 | O |
| ATOM | 718 | N   | VAL | A | 420 | -12.511 | 3.301  | -8.278  | 1.00 | 12.38 | N |
| ATOM | 719 | CA  | VAL | A | 420 | -13.050 | 3.853  | -7.043  | 1.00 | 18.61 | C |
| ATOM | 720 | C   | VAL | A | 420 | -14.355 | 3.176  | -6.632  | 1.00 | 17.83 | C |
| ATOM | 721 | O   | VAL | A | 420 | -15.275 | 3.028  | -7.436  | 1.00 | 19.12 | O |
| ATOM | 722 | CB  | VAL | A | 420 | -13.267 | 5.376  | -7.147  | 1.00 | 15.82 | C |
| ATOM | 723 | CG1 | VAL | A | 420 | -13.991 | 5.896  | -5.912  | 1.00 | 12.27 | C |
| ATOM | 724 | CG2 | VAL | A | 420 | -11.935 | 6.091  | -7.336  | 1.00 | 11.80 | C |
| ATOM | 725 | N   | ILE | A | 421 | -14.417 | 2.756  | -5.373  | 1.00 | 16.46 | N |
| ATOM | 726 | CA  | ILE | A | 421 | -15.630 | 2.193  | -4.799  | 1.00 | 16.74 | C |
| ATOM | 727 | C   | ILE | A | 421 | -15.917 | 2.868  | -3.465  | 1.00 | 19.99 | C |
| ATOM | 728 | O   | ILE | A | 421 | -15.095 | 2.820  | -2.549  | 1.00 | 19.72 | O |
| ATOM | 729 | CB  | ILE | A | 421 | -15.503 | 0.678  | -4.563  | 1.00 | 19.13 | C |
| ATOM | 730 | CG1 | ILE | A | 421 | -15.398 | -0.072 | -5.892  | 1.00 | 20.90 | C |
| ATOM | 731 | CG2 | ILE | A | 421 | -16.691 | 0.167  | -3.764  | 1.00 | 21.60 | C |
| ATOM | 732 | CD1 | ILE | A | 421 | -15.202 | -1.569 | -5.733  | 1.00 | 18.73 | C |
| ATOM | 733 | N   | ASP | A | 422 | -17.081 | 3.501  | -3.362  | 1.00 | 18.20 | N |
| ATOM | 734 | CA  | ASP | A | 422 | -17.484 | 4.169  | -2.130  | 1.00 | 19.03 | C |
| ATOM | 735 | C   | ASP | A | 422 | -16.380 | 5.079  | -1.584  | 1.00 | 14.41 | C |
| ATOM | 736 | O   | ASP | A | 422 | -16.027 | 5.008  | -0.408  | 1.00 | 14.87 | O |
| ATOM | 737 | CB  | ASP | A | 422 | -17.899 | 3.139  | -1.074  | 1.00 | 19.95 | C |
| ATOM | 738 | CG  | ASP | A | 422 | -19.033 | 2.241  | -1.548  | 1.00 | 26.06 | C |
| ATOM | 739 | OD1 | ASP | A | 422 | -19.836 | 2.687  | -2.395  | 1.00 | 27.22 | O |
| ATOM | 740 | OD2 | ASP | A | 422 | -19.121 | 1.090  | -1.071  | 1.00 | 23.32 | O |
| ATOM | 741 | N   | GLY | A | 423 | -15.835 | 5.927  | -2.450  | 1.00 | 17.25 | N |
| ATOM | 742 | CA  | GLY | A | 423 | -14.850 | 6.913  | -2.045  | 1.00 | 15.92 | C |

|      |     |     |     |   |     |         |        |         |      |       |   |
|------|-----|-----|-----|---|-----|---------|--------|---------|------|-------|---|
| ATOM | 743 | C   | GLY | A | 423 | -13.474 | 6.358  | -1.724  | 1.00 | 15.58 | C |
| ATOM | 744 | O   | GLY | A | 423 | -12.625 | 7.065  | -1.181  | 1.00 | 17.52 | O |
| ATOM | 745 | N   | HIS | A | 424 | -13.245 | 5.093  | -2.060  | 1.00 | 15.35 | N |
| ATOM | 746 | CA  | HIS | A | 424 | -11.954 | 4.469  | -1.798  | 1.00 | 15.20 | C |
| ATOM | 747 | C   | HIS | A | 424 | -11.257 | 4.078  | -3.093  | 1.00 | 15.53 | C |
| ATOM | 748 | O   | HIS | A | 424 | -11.870 | 3.496  | -3.988  | 1.00 | 17.37 | O |
| ATOM | 749 | CB  | HIS | A | 424 | -12.120 | 3.251  | -0.890  | 1.00 | 15.81 | C |
| ATOM | 750 | CG  | HIS | A | 424 | -12.681 | 3.579  | 0.458   | 1.00 | 21.16 | C |
| ATOM | 751 | ND1 | HIS | A | 424 | -13.316 | 2.645  | 1.248   | 1.00 | 29.28 | N |
| ATOM | 752 | CD2 | HIS | A | 424 | -12.705 | 4.739  | 1.155   | 1.00 | 18.96 | C |
| ATOM | 753 | CE1 | HIS | A | 424 | -13.707 | 3.216  | 2.374   | 1.00 | 24.00 | C |
| ATOM | 754 | NE2 | HIS | A | 424 | -13.348 | 4.487  | 2.343   | 1.00 | 18.64 | N |
| ATOM | 755 | N   | ILE | A | 425 | -9.971  | 4.404  | -3.187  | 1.00 | 12.47 | N |
| ATOM | 756 | CA  | ILE | A | 425 | -9.196  | 4.131  | -4.391  | 1.00 | 13.70 | C |
| ATOM | 757 | C   | ILE | A | 425 | -8.505  | 2.774  | -4.318  | 1.00 | 14.23 | C |
| ATOM | 758 | O   | ILE | A | 425 | -7.738  | 2.505  | -3.393  | 1.00 | 12.51 | O |
| ATOM | 759 | CB  | ILE | A | 425 | -8.123  | 5.210  | -4.624  | 1.00 | 13.71 | C |
| ATOM | 760 | CG1 | ILE | A | 425 | -8.722  | 6.608  | -4.464  | 1.00 | 10.23 | C |
| ATOM | 761 | CG2 | ILE | A | 425 | -7.480  | 5.040  | -5.996  | 1.00 | 10.54 | C |
| ATOM | 762 | CD1 | ILE | A | 425 | -7.717  | 7.719  | -4.655  | 1.00 | 14.56 | C |
| ATOM | 763 | N   | TYR | A | 426 | -8.778  | 1.922  | -5.299  | 1.00 | 10.62 | N |
| ATOM | 764 | CA  | TYR | A | 426 | -8.101  | 0.638  | -5.393  | 1.00 | 13.99 | C |
| ATOM | 765 | C   | TYR | A | 426 | -6.972  | 0.698  | -6.414  | 1.00 | 12.67 | C |
| ATOM | 766 | O   | TYR | A | 426 | -7.198  | 1.017  | -7.579  | 1.00 | 12.74 | O |
| ATOM | 767 | CB  | TYR | A | 426 | -9.087  | -0.467 | -5.779  | 1.00 | 18.17 | C |
| ATOM | 768 | CG  | TYR | A | 426 | -10.108 | -0.798 | -4.713  | 1.00 | 16.71 | C |
| ATOM | 769 | CD1 | TYR | A | 426 | -11.205 | 0.023  | -4.497  | 1.00 | 15.26 | C |
| ATOM | 770 | CD2 | TYR | A | 426 | -9.980  | -1.941 | -3.934  | 1.00 | 16.73 | C |
| ATOM | 771 | CE1 | TYR | A | 426 | -12.141 | -0.279 | -3.529  | 1.00 | 21.02 | C |
| ATOM | 772 | CE2 | TYR | A | 426 | -10.912 | -2.253 | -2.965  | 1.00 | 16.69 | C |
| ATOM | 773 | CZ  | TYR | A | 426 | -11.991 | -1.418 | -2.767  | 1.00 | 22.34 | C |
| ATOM | 774 | OH  | TYR | A | 426 | -12.925 | -1.722 | -1.802  | 1.00 | 21.02 | O |
| ATOM | 775 | N   | ALA | A | 427 | -5.756  | 0.398  | -5.967  | 1.00 | 14.92 | N |
| ATOM | 776 | CA  | ALA | A | 427 | -4.610  | 0.278  | -6.861  | 1.00 | 9.59  | C |
| ATOM | 777 | C   | ALA | A | 427 | -4.465  | -1.181 | -7.266  | 1.00 | 13.32 | C |
| ATOM | 778 | O   | ALA | A | 427 | -4.316  | -2.056 | -6.412  | 1.00 | 12.59 | O |
| ATOM | 779 | CB  | ALA | A | 427 | -3.346  | 0.768  | -6.178  | 1.00 | 11.00 | C |
| ATOM | 780 | N   | VAL | A | 428 | -4.505  | -1.440 | -8.570  | 1.00 | 11.70 | N |
| ATOM | 781 | CA  | VAL | A | 428 | -4.550  | -2.808 | -9.072  | 1.00 | 12.83 | C |
| ATOM | 782 | C   | VAL | A | 428 | -3.339  | -3.180 | -9.923  | 1.00 | 14.41 | C |
| ATOM | 783 | O   | VAL | A | 428 | -2.969  | -2.459 | -10.848 | 1.00 | 13.94 | O |
| ATOM | 784 | CB  | VAL | A | 428 | -5.825  | -3.052 | -9.903  | 1.00 | 10.79 | C |
| ATOM | 785 | CG1 | VAL | A | 428 | -5.916  | -4.512 | -10.316 | 1.00 | 8.13  | C |
| ATOM | 786 | CG2 | VAL | A | 428 | -7.060  | -2.630 | -9.119  | 1.00 | 11.71 | C |
| ATOM | 787 | N   | GLY | A | 429 | -2.734  | -4.318 | -9.604  | 1.00 | 13.65 | N |
| ATOM | 788 | CA  | GLY | A | 429 | -1.642  | -4.853 | -10.395 | 1.00 | 13.17 | C |



|      |     |     |           |        |        |         |      |       |   |
|------|-----|-----|-----------|--------|--------|---------|------|-------|---|
| ATOM | 789 | C   | GLY A 429 | -0.496 | -3.885 | -10.606 | 1.00 | 11.76 | C |
| ATOM | 790 | O   | GLY A 429 | -0.033 | -3.233 | -9.671  | 1.00 | 12.62 | O |
| ATOM | 791 | N   | GLY A 430 | -0.038 | -3.791 | -11.847 | 1.00 | 12.40 | N |
| ATOM | 792 | CA  | GLY A 430 | 1.127  | -2.989 | -12.160 | 1.00 | 13.21 | C |
| ATOM | 793 | C   | GLY A 430 | 2.388  | -3.804 | -11.965 | 1.00 | 14.96 | C |
| ATOM | 794 | O   | GLY A 430 | 2.330  | -5.011 | -11.734 | 1.00 | 13.09 | O |
| ATOM | 795 | N   | SER A 431 | 3.536  | -3.146 | -12.050 | 1.00 | 13.44 | N |
| ATOM | 796 | CA  | SER A 431 | 4.800  | -3.851 | -11.937 | 1.00 | 14.87 | C |
| ATOM | 797 | C   | SER A 431 | 5.825  | -3.076 | -11.122 | 1.00 | 16.94 | C |
| ATOM | 798 | O   | SER A 431 | 5.793  | -1.846 | -11.057 | 1.00 | 10.29 | O |
| ATOM | 799 | CB  | SER A 431 | 5.366  | -4.150 | -13.328 | 1.00 | 17.81 | C |
| ATOM | 800 | OG  | SER A 431 | 5.663  | -2.949 | -14.019 | 1.00 | 19.65 | O |
| ATOM | 801 | N   | HIS A 432 | 6.728  | -3.819 | -10.493 | 1.00 | 15.74 | N |
| ATOM | 802 | CA  | HIS A 432 | 7.908  | -3.239 | -9.877  | 1.00 | 13.83 | C |
| ATOM | 803 | C   | HIS A 432 | 9.109  | -4.046 | -10.338 | 1.00 | 16.15 | C |
| ATOM | 804 | O   | HIS A 432 | 9.352  | -5.146 | -9.842  | 1.00 | 17.22 | O |
| ATOM | 805 | CB  | HIS A 432 | 7.805  | -3.266 | -8.354  | 1.00 | 14.83 | C |
| ATOM | 806 | CG  | HIS A 432 | 9.022  | -2.737 | -7.663  | 1.00 | 16.24 | C |
| ATOM | 807 | ND1 | HIS A 432 | 9.336  | -3.056 | -6.358  | 1.00 | 15.01 | N |
| ATOM | 808 | CD2 | HIS A 432 | 10.004 | -1.911 | -8.096  | 1.00 | 12.85 | C |
| ATOM | 809 | CE1 | HIS A 432 | 10.459 | -2.449 | -6.018  | 1.00 | 14.42 | C |
| ATOM | 810 | NE2 | HIS A 432 | 10.884 | -1.747 | -7.055  | 1.00 | 15.44 | N |
| ATOM | 811 | N   | GLY A 433 | 9.849  | -3.503 | -11.299 | 1.00 | 14.11 | N |
| ATOM | 812 | CA  | GLY A 433 | 10.948 | -4.230 | -11.904 | 1.00 | 16.27 | C |
| ATOM | 813 | C   | GLY A 433 | 10.441 | -5.497 | -12.566 | 1.00 | 20.80 | C |
| ATOM | 814 | O   | GLY A 433 | 9.581  | -5.446 | -13.448 | 1.00 | 21.21 | O |
| ATOM | 815 | N   | CYS A 434 | 10.960 | -6.641 | -12.134 | 1.00 | 20.11 | N |
| ATOM | 816 | CA  | CYS A 434 | 10.538 | -7.919 | -12.705 | 1.00 | 26.64 | C |
| ATOM | 817 | C   | CYS A 434 | 9.334  | -8.520 | -11.968 | 1.00 | 25.48 | C |
| ATOM | 818 | O   | CYS A 434 | 8.803  | -9.559 | -12.370 | 1.00 | 27.43 | O |
| ATOM | 819 | CB  | CYS A 434 | 11.705 | -8.911 | -12.733 | 1.00 | 22.68 | C |
| ATOM | 820 | SG  | CYS A 434 | 12.232 | -9.502 | -11.116 | 1.00 | 32.66 | S |
| ATOM | 821 | N   | ILE A 435 | 8.913  | -7.858 | -10.893 | 1.00 | 17.08 | N |
| ATOM | 822 | CA  | ILE A 435 | 7.740  | -8.276 | -10.133 | 1.00 | 16.31 | C |
| ATOM | 823 | C   | ILE A 435 | 6.451  | -7.856 | -10.845 | 1.00 | 16.07 | C |
| ATOM | 824 | O   | ILE A 435 | 6.283  | -6.689 | -11.200 | 1.00 | 18.48 | O |
| ATOM | 825 | CB  | ILE A 435 | 7.770  | -7.704 | -8.699  | 1.00 | 18.07 | C |
| ATOM | 826 | CG1 | ILE A 435 | 8.914  | -8.334 | -7.907  | 1.00 | 21.13 | C |
| ATOM | 827 | CG2 | ILE A 435 | 6.474  | -7.988 | -7.982  | 1.00 | 12.92 | C |
| ATOM | 828 | CD1 | ILE A 435 | 9.375  | -7.515 | -6.717  | 1.00 | 18.45 | C |
| ATOM | 829 | N   | HIS A 436 | 5.547  | -8.810 | -11.054 | 1.00 | 13.91 | N |
| ATOM | 830 | CA  | HIS A 436 | 4.265  | -8.535 | -11.704 | 1.00 | 16.78 | C |
| ATOM | 831 | C   | HIS A 436 | 3.154  | -8.705 | -10.681 | 1.00 | 14.94 | C |
| ATOM | 832 | O   | HIS A 436 | 2.739  | -9.824 | -10.376 | 1.00 | 17.58 | O |
| ATOM | 833 | CB  | HIS A 436 | 4.069  | -9.470 | -12.895 | 1.00 | 17.52 | C |
| ATOM | 834 | CG  | HIS A 436 | 5.316  | -9.669 | -13.697 | 1.00 | 21.34 | C |

|      |     |               |        |         |         |      |       |   |
|------|-----|---------------|--------|---------|---------|------|-------|---|
| ATOM | 835 | ND1 HIS A 436 | 5.673  | -8.839  | -14.739 | 1.00 | 24.74 | N |
| ATOM | 836 | CD2 HIS A 436 | 6.305  | -10.588 | -13.593 | 1.00 | 21.38 | C |
| ATOM | 837 | CE1 HIS A 436 | 6.823  | -9.244  | -15.247 | 1.00 | 25.16 | C |
| ATOM | 838 | NE2 HIS A 436 | 7.228  | -10.304 | -14.570 | 1.00 | 27.10 | N |
| ATOM | 839 | N HIS A 437   | 2.678  | -7.583  | -10.152 | 1.00 | 14.12 | N |
| ATOM | 840 | CA HIS A 437  | 1.722  | -7.597  | -9.052  | 1.00 | 14.10 | C |
| ATOM | 841 | C HIS A 437   | 0.401  | -8.261  | -9.419  | 1.00 | 14.36 | C |
| ATOM | 842 | O HIS A 437   | -0.218 | -7.922  | -10.428 | 1.00 | 15.41 | O |
| ATOM | 843 | CB HIS A 437  | 1.442  | -6.171  | -8.566  | 1.00 | 14.04 | C |
| ATOM | 844 | CG HIS A 437  | 2.651  | -5.454  | -8.048  | 1.00 | 12.95 | C |
| ATOM | 845 | ND1 HIS A 437 | 3.519  | -6.017  | -7.138  | 1.00 | 10.46 | N |
| ATOM | 846 | CD2 HIS A 437 | 3.125  | -4.211  | -8.302  | 1.00 | 10.91 | C |
| ATOM | 847 | CE1 HIS A 437 | 4.482  | -5.155  | -6.860  | 1.00 | 12.91 | C |
| ATOM | 848 | NE2 HIS A 437 | 4.266  | -4.052  | -7.554  | 1.00 | 12.55 | N |
| ATOM | 849 | N ASN A 438   | -0.017 | -9.215  | -8.596  | 1.00 | 13.76 | N |
| ATOM | 850 | CA ASN A 438  | -1.395 | -9.676  | -8.605  | 1.00 | 14.36 | C |
| ATOM | 851 | C ASN A 438   | -2.102 | -9.036  | -7.422  | 1.00 | 12.63 | C |
| ATOM | 852 | O ASN A 438   | -3.316 | -9.151  | -7.268  | 1.00 | 14.95 | O |
| ATOM | 853 | CB ASN A 438  | -1.477 | -11.201 | -8.516  | 1.00 | 16.36 | C |
| ATOM | 854 | CG ASN A 438  | -0.870 | -11.751 | -7.237  | 1.00 | 15.16 | C |
| ATOM | 855 | OD1 ASN A 438 | 0.142  | -11.253 | -6.749  | 1.00 | 18.84 | O |
| ATOM | 856 | ND2 ASN A 438 | -1.489 | -12.789 | -6.691  | 1.00 | 16.17 | N |
| ATOM | 857 | N SER A 439   | -1.320 | -8.348  | -6.594  | 1.00 | 11.65 | N |
| ATOM | 858 | CA SER A 439  | -1.827 | -7.726  | -5.376  | 1.00 | 15.68 | C |
| ATOM | 859 | C SER A 439   | -2.620 | -6.453  | -5.653  | 1.00 | 17.91 | C |
| ATOM | 860 | O SER A 439   | -2.542 | -5.871  | -6.738  | 1.00 | 16.08 | O |
| ATOM | 861 | CB SER A 439  | -0.680 | -7.416  | -4.410  | 1.00 | 13.76 | C |
| ATOM | 862 | OG SER A 439  | 0.182  | -6.425  | -4.941  | 1.00 | 15.91 | O |
| ATOM | 863 | N VAL A 440   | -3.371 | -6.023  | -4.646  | 1.00 | 12.83 | N |
| ATOM | 864 | CA VAL A 440  | -4.262 | -4.885  | -4.768  | 1.00 | 11.08 | C |
| ATOM | 865 | C VAL A 440   | -4.431 | -4.240  | -3.401  | 1.00 | 13.46 | C |
| ATOM | 866 | O VAL A 440   | -4.620 | -4.934  | -2.403  | 1.00 | 14.78 | O |
| ATOM | 867 | CB VAL A 440  | -5.643 | -5.325  | -5.289  | 1.00 | 13.72 | C |
| ATOM | 868 | CG1 VAL A 440 | -6.626 | -4.162  | -5.261  | 1.00 | 11.40 | C |
| ATOM | 869 | CG2 VAL A 440 | -5.522 | -5.908  | -6.693  | 1.00 | 12.59 | C |
| ATOM | 870 | N GLU A 441   | -4.354 | -2.914  | -3.354  | 1.00 | 11.29 | N |
| ATOM | 871 | CA GLU A 441  | -4.524 | -2.195  | -2.098  | 1.00 | 14.61 | C |
| ATOM | 872 | C GLU A 441   | -5.587 | -1.106  | -2.198  | 1.00 | 15.53 | C |
| ATOM | 873 | O GLU A 441   | -5.905 | -0.626  | -3.286  | 1.00 | 14.49 | O |
| ATOM | 874 | CB GLU A 441  | -3.190 | -1.625  | -1.604  | 1.00 | 12.35 | C |
| ATOM | 875 | CG GLU A 441  | -2.353 | -0.954  | -2.679  | 1.00 | 11.54 | C |
| ATOM | 876 | CD GLU A 441  | -0.916 | -0.747  | -2.242  | 1.00 | 9.91  | C |
| ATOM | 877 | OE1 GLU A 441 | -0.696 | -0.065  | -1.221  | 1.00 | 12.34 | O |
| ATOM | 878 | OE2 GLU A 441 | -0.005 | -1.277  | -2.912  | 1.00 | 8.35  | O |
| ATOM | 879 | N ARG A 442   | -6.135 | -0.728  | -1.048  | 1.00 | 15.93 | N |
| ATOM | 880 | CA ARG A 442  | -7.241 | 0.217   | -0.991  | 1.00 | 14.95 | C |

|      |     |     |     |       |         |        |        |      |       |   |
|------|-----|-----|-----|-------|---------|--------|--------|------|-------|---|
| ATOM | 881 | C   | ARG | A 442 | -6.870  | 1.444  | -0.163 | 1.00 | 14.54 | C |
| ATOM | 882 | O   | ARG | A 442 | -6.443  | 1.321  | 0.985  | 1.00 | 14.17 | O |
| ATOM | 883 | CB  | ARG | A 442 | -8.478  | -0.470 | -0.407 | 1.00 | 17.84 | C |
| ATOM | 884 | CG  | ARG | A 442 | -9.667  | 0.447  | -0.183 | 1.00 | 19.20 | C |
| ATOM | 885 | CD  | ARG | A 442 | -10.882 | -0.345 | 0.273  | 1.00 | 23.56 | C |
| ATOM | 886 | NE  | ARG | A 442 | -10.574 | -1.218 | 1.402  | 1.00 | 23.31 | N |
| ATOM | 887 | CZ  | ARG | A 442 | -10.617 | -0.837 | 2.674  | 1.00 | 31.69 | C |
| ATOM | 888 | NH1 | ARG | A 442 | -10.956 | 0.407  | 2.982  | 1.00 | 33.58 | N |
| ATOM | 889 | NH2 | ARG | A 442 | -10.321 | -1.698 | 3.639  | 1.00 | 28.62 | N |
| ATOM | 890 | N   | TYR | A 443 | -7.035  | 2.625  | -0.752 | 1.00 | 13.54 | N |
| ATOM | 891 | CA  | TYR | A 443 | -6.687  | 3.871  | -0.076 | 1.00 | 12.51 | C |
| ATOM | 892 | C   | TYR | A 443 | -7.914  | 4.608  | 0.451  | 1.00 | 16.36 | C |
| ATOM | 893 | O   | TYR | A 443 | -8.865  | 4.868  | -0.289 | 1.00 | 16.10 | O |
| ATOM | 894 | CB  | TYR | A 443 | -5.887  | 4.788  | -1.003 | 1.00 | 13.44 | C |
| ATOM | 895 | CG  | TYR | A 443 | -5.598  | 6.147  | -0.403 | 1.00 | 13.74 | C |
| ATOM | 896 | CD1 | TYR | A 443 | -4.547  | 6.327  | 0.484  | 1.00 | 15.78 | C |
| ATOM | 897 | CD2 | TYR | A 443 | -6.378  | 7.249  | -0.723 | 1.00 | 15.43 | C |
| ATOM | 898 | CE1 | TYR | A 443 | -4.280  | 7.568  | 1.034  | 1.00 | 17.10 | C |
| ATOM | 899 | CE2 | TYR | A 443 | -6.118  | 8.493  | -0.179 | 1.00 | 15.51 | C |
| ATOM | 900 | CZ  | TYR | A 443 | -5.069  | 8.647  | 0.699  | 1.00 | 14.99 | C |
| ATOM | 901 | OH  | TYR | A 443 | -4.808  | 9.882  | 1.244  | 1.00 | 12.50 | O |
| ATOM | 902 | N   | GLU | A 444 | -7.877  | 4.948  | 1.735  | 1.00 | 16.04 | N |
| ATOM | 903 | CA  | GLU | A 444 | -8.966  | 5.670  | 2.379  | 1.00 | 18.52 | C |
| ATOM | 904 | C   | GLU | A 444 | -8.596  | 7.133  | 2.585  | 1.00 | 17.36 | C |
| ATOM | 905 | O   | GLU | A 444 | -7.859  | 7.465  | 3.511  | 1.00 | 18.96 | O |
| ATOM | 906 | CB  | GLU | A 444 | -9.308  | 5.022  | 3.721  | 1.00 | 22.16 | C |
| ATOM | 907 | CG  | GLU | A 444 | -9.783  | 3.582  | 3.609  | 1.00 | 20.47 | C |
| ATOM | 908 | CD  | GLU | A 444 | -9.875  | 2.894  | 4.956  | 1.00 | 29.37 | C |
| ATOM | 909 | OE1 | GLU | A 444 | -8.995  | 3.135  | 5.810  | 1.00 | 30.26 | O |
| ATOM | 910 | OE2 | GLU | A 444 | -10.829 | 2.116  | 5.162  | 1.00 | 34.07 | O |
| ATOM | 911 | N   | PRO | A 445 | -9.110  | 8.013  | 1.714  | 1.00 | 16.88 | N |
| ATOM | 912 | CA  | PRO | A 445 | -8.838  | 9.453  | 1.761  | 1.00 | 14.90 | C |
| ATOM | 913 | C   | PRO | A 445 | -9.151  | 10.077 | 3.118  | 1.00 | 18.27 | C |
| ATOM | 914 | O   | PRO | A 445 | -8.499  | 11.046 | 3.506  | 1.00 | 16.26 | O |
| ATOM | 915 | CB  | PRO | A 445 | -9.780  | 10.017 | 0.695  | 1.00 | 17.30 | C |
| ATOM | 916 | CG  | PRO | A 445 | -9.947  | 8.899  | -0.273 | 1.00 | 15.93 | C |
| ATOM | 917 | CD  | PRO | A 445 | -9.958  | 7.651  | 0.564  | 1.00 | 19.68 | C |
| ATOM | 918 | N   | GLU | A 446 | -10.131 | 9.530  | 3.829  | 1.00 | 20.02 | N |
| ATOM | 919 | CA  | GLU | A 446 | -10.519 | 10.083 | 5.122  | 1.00 | 21.53 | C |
| ATOM | 920 | C   | GLU | A 446 | -9.530  | 9.700  | 6.222  | 1.00 | 21.65 | C |
| ATOM | 921 | O   | GLU | A 446 | -9.573  | 10.244 | 7.324  | 1.00 | 17.65 | O |
| ATOM | 922 | CB  | GLU | A 446 | -11.938 | 9.651  | 5.503  | 1.00 | 18.77 | C |
| ATOM | 923 | CG  | GLU | A 446 | -12.082 | 8.175  | 5.857  | 1.00 | 34.94 | C |
| ATOM | 924 | CD  | GLU | A 446 | -12.197 | 7.274  | 4.637  | 1.00 | 27.73 | C |
| ATOM | 925 | OE1 | GLU | A 446 | -12.021 | 7.768  | 3.502  | 1.00 | 21.96 | O |
| ATOM | 926 | OE2 | GLU | A 446 | -12.471 | 6.068  | 4.818  | 1.00 | 25.44 | O |

|      |     |     |     |   |     |        |        |        |      |       |   |
|------|-----|-----|-----|---|-----|--------|--------|--------|------|-------|---|
| ATOM | 927 | N   | ARG | A | 447 | -8.634 | 8.767  | 5.916  | 1.00 | 19.49 | N |
| ATOM | 928 | CA  | ARG | A | 447 | -7.613 | 8.352  | 6.873  | 1.00 | 23.26 | C |
| ATOM | 929 | C   | ARG | A | 447 | -6.214 | 8.523  | 6.296  | 1.00 | 19.79 | C |
| ATOM | 930 | O   | ARG | A | 447 | -5.220 | 8.391  | 7.008  | 1.00 | 18.55 | O |
| ATOM | 931 | CB  | ARG | A | 447 | -7.826 | 6.895  | 7.289  | 1.00 | 24.19 | C |
| ATOM | 932 | CG  | ARG | A | 447 | -9.106 | 6.647  | 8.073  | 1.00 | 27.06 | C |
| ATOM | 933 | CD  | ARG | A | 447 | -9.329 | 5.161  | 8.305  | 1.00 | 33.23 | C |
| ATOM | 934 | NE  | ARG | A | 447 | -8.132 | 4.508  | 8.827  | 1.00 | 39.83 | N |
| ATOM | 935 | CZ  | ARG | A | 447 | -7.777 | 4.513  | 10.108 | 1.00 | 42.80 | C |
| ATOM | 936 | NH1 | ARG | A | 447 | -6.669 | 3.894  | 10.494 | 1.00 | 40.05 | N |
| ATOM | 937 | NH2 | ARG | A | 447 | -8.528 | 5.140  | 11.003 | 1.00 | 43.73 | N |
| ATOM | 938 | N   | ASP | A | 448 | -6.145 | 8.822  | 5.003  | 1.00 | 19.93 | N |
| ATOM | 939 | CA  | ASP | A | 448 | -4.871 | 8.881  | 4.297  | 1.00 | 17.95 | C |
| ATOM | 940 | C   | ASP | A | 448 | -4.057 | 7.621  | 4.573  | 1.00 | 17.62 | C |
| ATOM | 941 | O   | ASP | A | 448 | -2.905 | 7.696  | 4.996  | 1.00 | 16.47 | O |
| ATOM | 942 | CB  | ASP | A | 448 | -4.077 | 10.121 | 4.706  | 1.00 | 17.15 | C |
| ATOM | 943 | CG  | ASP | A | 448 | -2.822 | 10.305 | 3.875  | 1.00 | 17.29 | C |
| ATOM | 944 | OD1 | ASP | A | 448 | -2.824 | 9.886  | 2.698  | 1.00 | 12.31 | O |
| ATOM | 945 | OD2 | ASP | A | 448 | -1.835 | 10.867 | 4.396  | 1.00 | 21.15 | O |
| ATOM | 946 | N   | GLU | A | 449 | -4.669 | 6.465  | 4.335  | 1.00 | 18.47 | N |
| ATOM | 947 | CA  | GLU | A | 449 | -4.019 | 5.184  | 4.585  | 1.00 | 18.62 | C |
| ATOM | 948 | C   | GLU | A | 449 | -4.201 | 4.211  | 3.427  | 1.00 | 14.33 | C |
| ATOM | 949 | O   | GLU | A | 449 | -5.237 | 4.206  | 2.764  | 1.00 | 13.41 | O |
| ATOM | 950 | CB  | GLU | A | 449 | -4.561 | 4.547  | 5.867  | 1.00 | 18.41 | C |
| ATOM | 951 | CG  | GLU | A | 449 | -4.119 | 5.223  | 7.152  | 1.00 | 23.67 | C |
| ATOM | 952 | CD  | GLU | A | 449 | -4.551 | 4.453  | 8.388  | 1.00 | 29.12 | C |
| ATOM | 953 | OE1 | GLU | A | 449 | -5.475 | 3.618  | 8.279  | 1.00 | 30.65 | O |
| ATOM | 954 | OE2 | GLU | A | 449 | -3.962 | 4.677  | 9.467  | 1.00 | 39.88 | O |
| ATOM | 955 | N   | TRP | A | 450 | -3.183 | 3.389  | 3.192  | 1.00 | 15.67 | N |
| ATOM | 956 | CA  | TRP | A | 450 | -3.268 | 2.299  | 2.229  | 1.00 | 15.34 | C |
| ATOM | 957 | C   | TRP | A | 450 | -3.296 | 0.961  | 2.962  | 1.00 | 14.82 | C |
| ATOM | 958 | O   | TRP | A | 450 | -2.377 | 0.641  | 3.715  | 1.00 | 17.92 | O |
| ATOM | 959 | CB  | TRP | A | 450 | -2.072 | 2.319  | 1.274  | 1.00 | 15.55 | C |
| ATOM | 960 | CG  | TRP | A | 450 | -2.134 | 3.361  | 0.190  | 1.00 | 16.60 | C |
| ATOM | 961 | CD1 | TRP | A | 450 | -1.536 | 4.587  | 0.197  | 1.00 | 14.87 | C |
| ATOM | 962 | CD2 | TRP | A | 450 | -2.813 | 3.253  | -1.070 | 1.00 | 14.63 | C |
| ATOM | 963 | NE1 | TRP | A | 450 | -1.806 | 5.252  | -0.977 | 1.00 | 12.73 | N |
| ATOM | 964 | CE2 | TRP | A | 450 | -2.585 | 4.457  | -1.768 | 1.00 | 13.25 | C |
| ATOM | 965 | CE3 | TRP | A | 450 | -3.589 | 2.258  | -1.670 | 1.00 | 15.51 | C |
| ATOM | 966 | CZ2 | TRP | A | 450 | -3.113 | 4.690  | -3.038 | 1.00 | 14.28 | C |
| ATOM | 967 | CZ3 | TRP | A | 450 | -4.110 | 2.494  | -2.933 | 1.00 | 11.66 | C |
| ATOM | 968 | CH2 | TRP | A | 450 | -3.870 | 3.700  | -3.601 | 1.00 | 13.80 | C |
| ATOM | 969 | N   | HIS | A | 451 | -4.350 | 0.184  | 2.746  | 1.00 | 16.11 | N |
| ATOM | 970 | CA  | HIS | A | 451 | -4.425 | -1.168 | 3.287  | 1.00 | 15.05 | C |
| ATOM | 971 | C   | HIS | A | 451 | -4.659 | -2.168 | 2.166  | 1.00 | 14.07 | C |
| ATOM | 972 | O   | HIS | A | 451 | -5.532 | -1.968 | 1.321  | 1.00 | 14.36 | O |

|      |      |     |     |   |     |        |         |         |      |       |   |
|------|------|-----|-----|---|-----|--------|---------|---------|------|-------|---|
| ATOM | 973  | CB  | HIS | A | 451 | -5.535 | -1.278  | 4.333   | 1.00 | 14.49 | C |
| ATOM | 974  | CG  | HIS | A | 451 | -5.234 | -0.555  | 5.609   | 1.00 | 24.91 | C |
| ATOM | 975  | ND1 | HIS | A | 451 | -4.438 | -1.093  | 6.598   | 1.00 | 22.46 | N |
| ATOM | 976  | CD2 | HIS | A | 451 | -5.619 | 0.663   | 6.056   | 1.00 | 23.63 | C |
| ATOM | 977  | CE1 | HIS | A | 451 | -4.346 | -0.236  | 7.600   | 1.00 | 22.78 | C |
| ATOM | 978  | NE2 | HIS | A | 451 | -5.054 | 0.837   | 7.297   | 1.00 | 24.49 | N |
| ATOM | 979  | N   | LEU | A | 452 | -3.876 | -3.241  | 2.153   | 1.00 | 12.77 | N |
| ATOM | 980  | CA  | LEU | A | 452 | -4.002 | -4.244  | 1.104   | 1.00 | 13.22 | C |
| ATOM | 981  | C   | LEU | A | 452 | -5.263 | -5.081  | 1.261   | 1.00 | 13.09 | C |
| ATOM | 982  | O   | LEU | A | 452 | -5.797 | -5.221  | 2.360   | 1.00 | 14.04 | O |
| ATOM | 983  | CB  | LEU | A | 452 | -2.767 | -5.147  | 1.050   | 1.00 | 10.88 | C |
| ATOM | 984  | CG  | LEU | A | 452 | -1.564 | -4.552  | 0.315   | 1.00 | 13.59 | C |
| ATOM | 985  | CD1 | LEU | A | 452 | -0.559 | -3.969  | 1.294   | 1.00 | 9.52  | C |
| ATOM | 986  | CD2 | LEU | A | 452 | -0.918 | -5.587  | -0.594  | 1.00 | 11.65 | C |
| ATOM | 987  | N   | VAL | A | 453 | -5.738 | -5.627  | 0.148   | 1.00 | 9.92  | N |
| ATOM | 988  | CA  | VAL | A | 453 | -6.890 | -6.514  | 0.166   | 1.00 | 13.54 | C |
| ATOM | 989  | C   | VAL | A | 453 | -6.520 | -7.823  | -0.521  | 1.00 | 12.78 | C |
| ATOM | 990  | O   | VAL | A | 453 | -5.344 | -8.084  | -0.776  | 1.00 | 11.55 | O |
| ATOM | 991  | CB  | VAL | A | 453 | -8.114 | -5.881  | -0.526  | 1.00 | 11.41 | C |
| ATOM | 992  | CG1 | VAL | A | 453 | -8.422 | -4.527  | 0.087   | 1.00 | 11.04 | C |
| ATOM | 993  | CG2 | VAL | A | 453 | -7.871 | -5.748  | -2.021  | 1.00 | 13.69 | C |
| ATOM | 994  | N   | ALA | A | 454 | -7.519 | -8.647  | -0.810  | 1.00 | 12.41 | N |
| ATOM | 995  | CA  | ALA | A | 454 | -7.272 | -9.917  | -1.477  | 1.00 | 16.51 | C |
| ATOM | 996  | C   | ALA | A | 454 | -6.603 | -9.683  | -2.825  | 1.00 | 14.48 | C |
| ATOM | 997  | O   | ALA | A | 454 | -7.052 | -8.851  | -3.611  | 1.00 | 15.92 | O |
| ATOM | 998  | CB  | ALA | A | 454 | -8.569 | -10.686 | -1.651  | 1.00 | 15.51 | C |
| ATOM | 999  | N   | PRO | A | 455 | -5.510 | -10.408 | -3.091  | 1.00 | 18.24 | N |
| ATOM | 1000 | CA  | PRO | A | 455 | -4.844 | -10.294 | -4.392  | 1.00 | 14.87 | C |
| ATOM | 1001 | C   | PRO | A | 455 | -5.697 | -10.896 | -5.504  | 1.00 | 16.30 | C |
| ATOM | 1002 | O   | PRO | A | 455 | -6.543 | -11.753 | -5.242  | 1.00 | 16.39 | O |
| ATOM | 1003 | CB  | PRO | A | 455 | -3.563 | -11.109 | -4.200  | 1.00 | 15.53 | C |
| ATOM | 1004 | CG  | PRO | A | 455 | -3.889 | -12.079 | -3.111  | 1.00 | 15.14 | C |
| ATOM | 1005 | CD  | PRO | A | 455 | -4.823 | -11.350 | -2.190  | 1.00 | 18.73 | C |
| ATOM | 1006 | N   | MET | A | 456 | -5.482 | -10.440 | -6.732  | 1.00 | 13.87 | N |
| ATOM | 1007 | CA  | MET | A | 456 | -6.187 | -10.983 | -7.881  | 1.00 | 15.34 | C |
| ATOM | 1008 | C   | MET | A | 456 | -5.784 | -12.432 | -8.109  | 1.00 | 16.67 | C |
| ATOM | 1009 | O   | MET | A | 456 | -4.762 | -12.890 | -7.600  | 1.00 | 13.08 | O |
| ATOM | 1010 | CB  | MET | A | 456 | -5.878 | -10.166 | -9.136  | 1.00 | 13.78 | C |
| ATOM | 1011 | CG  | MET | A | 456 | -6.446 | -8.760  | -9.130  | 1.00 | 11.42 | C |
| ATOM | 1012 | SD  | MET | A | 456 | -6.121 | -7.914  | -10.688 | 1.00 | 8.51  | S |
| ATOM | 1013 | CE  | MET | A | 456 | -4.329 | -7.906  | -10.703 | 1.00 | 9.62  | C |
| ATOM | 1014 | N   | LEU | A | 457 | -6.595 | -13.149 | -8.878  | 1.00 | 14.87 | N |
| ATOM | 1015 | CA  | LEU | A | 457 | -6.277 | -14.519 | -9.246  | 1.00 | 15.86 | C |
| ATOM | 1016 | C   | LEU | A | 457 | -5.107 | -14.528 | -10.222 | 1.00 | 16.79 | C |
| ATOM | 1017 | O   | LEU | A | 457 | -4.361 | -15.504 | -10.309 | 1.00 | 20.06 | O |
| ATOM | 1018 | CB  | LEU | A | 457 | -7.498 | -15.194 | -9.873  | 1.00 | 17.08 | C |

|      |      |     |     |   |     |        |         |         |      |       |   |
|------|------|-----|-----|---|-----|--------|---------|---------|------|-------|---|
| ATOM | 1019 | CG  | LEU | A | 457 | -8.741 | -15.252 | -8.983  | 1.00 | 18.95 | C |
| ATOM | 1020 | CD1 | LEU | A | 457 | -9.951 | -15.721 | -9.771  | 1.00 | 18.16 | C |
| ATOM | 1021 | CD2 | LEU | A | 457 | -8.497 | -16.158 | -7.785  | 1.00 | 18.31 | C |
| ATOM | 1022 | N   | THR | A | 458 | -4.943 | -13.427 | -10.949 | 1.00 | 18.96 | N |
| ATOM | 1023 | CA  | THR | A | 458 | -3.902 | -13.332 | -11.965 | 1.00 | 16.76 | C |
| ATOM | 1024 | C   | THR | A | 458 | -3.036 | -12.090 | -11.786 | 1.00 | 14.01 | C |
| ATOM | 1025 | O   | THR | A | 458 | -3.522 | -11.034 | -11.384 | 1.00 | 15.46 | O |
| ATOM | 1026 | CB  | THR | A | 458 | -4.506 | -13.292 | -13.380 | 1.00 | 14.34 | C |
| ATOM | 1027 | OG1 | THR | A | 458 | -5.532 | -14.286 | -13.499 | 1.00 | 14.81 | O |
| ATOM | 1028 | CG2 | THR | A | 458 | -3.425 | -13.539 | -14.427 | 1.00 | 12.98 | C |
| ATOM | 1029 | N   | ARG | A | 459 | -1.749 | -12.225 | -12.087 | 1.00 | 10.99 | N |
| ATOM | 1030 | CA  | ARG | A | 459 | -0.849 | -11.083 | -12.098 | 1.00 | 12.06 | C |
| ATOM | 1031 | C   | ARG | A | 459 | -1.105 | -10.267 | -13.355 | 1.00 | 11.77 | C |
| ATOM | 1032 | O   | ARG | A | 459 | -1.108 | -10.808 | -14.458 | 1.00 | 16.81 | O |
| ATOM | 1033 | CB  | ARG | A | 459 | 0.602  | -11.553 | -12.065 | 1.00 | 17.38 | C |
| ATOM | 1034 | CG  | ARG | A | 459 | 0.964  | -12.334 | -10.818 | 1.00 | 18.03 | C |
| ATOM | 1035 | CD  | ARG | A | 459 | 2.346  | -12.942 | -10.940 | 1.00 | 18.12 | C |
| ATOM | 1036 | NE  | ARG | A | 459 | 2.660  | -13.799 | -9.804  | 1.00 | 27.95 | N |
| ATOM | 1037 | CZ  | ARG | A | 459 | 3.735  | -14.577 | -9.732  | 1.00 | 37.16 | C |
| ATOM | 1038 | NH1 | ARG | A | 459 | 4.602  | -14.607 | -10.735 | 1.00 | 37.60 | N |
| ATOM | 1039 | NH2 | ARG | A | 459 | 3.940  | -15.327 | -8.658  | 1.00 | 36.76 | N |
| ATOM | 1040 | N   | ARG | A | 460 | -1.325 | -8.967  | -13.192 | 1.00 | 11.18 | N |
| ATOM | 1041 | CA  | ARG | A | 460 | -1.670 | -8.117  | -14.328 | 1.00 | 13.98 | C |
| ATOM | 1042 | C   | ARG | A | 460 | -0.949 | -6.774  | -14.297 | 1.00 | 14.65 | C |
| ATOM | 1043 | O   | ARG | A | 460 | -1.177 | -5.960  | -13.402 | 1.00 | 15.95 | O |
| ATOM | 1044 | CB  | ARG | A | 460 | -3.181 | -7.870  | -14.368 | 1.00 | 12.29 | C |
| ATOM | 1045 | CG  | ARG | A | 460 | -4.034 | -9.127  | -14.327 | 1.00 | 11.79 | C |
| ATOM | 1046 | CD  | ARG | A | 460 | -5.510 | -8.774  | -14.264 | 1.00 | 10.02 | C |
| ATOM | 1047 | NE  | ARG | A | 460 | -6.357 | -9.960  | -14.188 | 1.00 | 13.26 | N |
| ATOM | 1048 | CZ  | ARG | A | 460 | -6.872 | -10.576 | -15.248 | 1.00 | 16.74 | C |
| ATOM | 1049 | NH1 | ARG | A | 460 | -6.625 | -10.118 | -16.469 | 1.00 | 13.10 | N |
| ATOM | 1050 | NH2 | ARG | A | 460 | -7.633 | -11.649 | -15.088 | 1.00 | 18.53 | N |
| ATOM | 1051 | N   | ILE | A | 461 | -0.076 | -6.545  | -15.273 | 1.00 | 13.79 | N |
| ATOM | 1052 | CA  | ILE | A | 461 | 0.481  | -5.213  | -15.477 | 1.00 | 17.37 | C |
| ATOM | 1053 | C   | ILE | A | 461 | -0.054 | -4.665  | -16.793 | 1.00 | 12.00 | C |
| ATOM | 1054 | O   | ILE | A | 461 | -0.207 | -5.405  | -17.763 | 1.00 | 13.49 | O |
| ATOM | 1055 | CB  | ILE | A | 461 | 2.026  | -5.204  | -15.492 | 1.00 | 18.15 | C |
| ATOM | 1056 | CG1 | ILE | A | 461 | 2.554  | -5.234  | -16.927 | 1.00 | 13.43 | C |
| ATOM | 1057 | CG2 | ILE | A | 461 | 2.580  | -6.351  | -14.660 | 1.00 | 19.34 | C |
| ATOM | 1058 | CD1 | ILE | A | 461 | 4.036  | -4.981  | -17.028 | 1.00 | 19.13 | C |
| ATOM | 1059 | N   | GLY | A | 462 | -0.343 | -3.371  | -16.823 | 1.00 | 13.57 | N |
| ATOM | 1060 | CA  | GLY | A | 462 | -0.990 | -2.778  | -17.978 | 1.00 | 18.18 | C |
| ATOM | 1061 | C   | GLY | A | 462 | -2.453 | -3.175  | -17.984 | 1.00 | 13.10 | C |
| ATOM | 1062 | O   | GLY | A | 462 | -3.098 | -3.239  | -19.032 | 1.00 | 11.13 | O |
| ATOM | 1063 | N   | VAL | A | 463 | -2.968 | -3.449  | -16.791 | 1.00 | 10.62 | N |
| ATOM | 1064 | CA  | VAL | A | 463 | -4.347 | -3.875  | -16.612 | 1.00 | 11.11 | C |

|      |      |     |     |   |     |         |        |         |      |       |   |
|------|------|-----|-----|---|-----|---------|--------|---------|------|-------|---|
| ATOM | 1065 | C   | VAL | A | 463 | -5.312  | -2.699 | -16.736 | 1.00 | 9.38  | C |
| ATOM | 1066 | O   | VAL | A | 463 | -4.967  | -1.561 | -16.422 | 1.00 | 10.66 | O |
| ATOM | 1067 | CB  | VAL | A | 463 | -4.539  | -4.555 | -15.235 | 1.00 | 13.52 | C |
| ATOM | 1068 | CG1 | VAL | A | 463 | -4.134  | -3.612 | -14.114 | 1.00 | 11.34 | C |
| ATOM | 1069 | CG2 | VAL | A | 463 | -5.977  | -5.016 | -15.055 | 1.00 | 13.27 | C |
| ATOM | 1070 | N   | GLY | A | 464 | -6.521  | -2.982 | -17.207 | 1.00 | 13.87 | N |
| ATOM | 1071 | CA  | GLY | A | 464 | -7.572  | -1.984 | -17.263 | 1.00 | 9.38  | C |
| ATOM | 1072 | C   | GLY | A | 464 | -8.561  | -2.225 | -16.141 | 1.00 | 12.28 | C |
| ATOM | 1073 | O   | GLY | A | 464 | -8.990  | -3.357 | -15.914 | 1.00 | 13.50 | O |
| ATOM | 1074 | N   | VAL | A | 465 | -8.919  | -1.162 | -15.429 | 1.00 | 13.63 | N |
| ATOM | 1075 | CA  | VAL | A | 465 | -9.814  | -1.282 | -14.287 | 1.00 | 10.52 | C |
| ATOM | 1076 | C   | VAL | A | 465 | -11.019 | -0.362 | -14.417 | 1.00 | 10.96 | C |
| ATOM | 1077 | O   | VAL | A | 465 | -10.903 | 0.767  | -14.892 | 1.00 | 10.55 | O |
| ATOM | 1078 | CB  | VAL | A | 465 | -9.079  | -0.972 | -12.970 | 1.00 | 11.65 | C |
| ATOM | 1079 | CG1 | VAL | A | 465 | -10.045 | -1.020 | -11.798 | 1.00 | 11.93 | C |
| ATOM | 1080 | CG2 | VAL | A | 465 | -7.933  | -1.948 | -12.764 | 1.00 | 9.41  | C |
| ATOM | 1081 | N   | ALA | A | 466 | -12.178 | -0.857 | -13.993 | 1.00 | 10.97 | N |
| ATOM | 1082 | CA  | ALA | A | 466 | -13.401 | -0.065 | -13.988 | 1.00 | 11.28 | C |
| ATOM | 1083 | C   | ALA | A | 466 | -14.363 | -0.609 | -12.940 | 1.00 | 12.82 | C |
| ATOM | 1084 | O   | ALA | A | 466 | -14.299 | -1.783 | -12.580 | 1.00 | 14.19 | O |
| ATOM | 1085 | CB  | ALA | A | 466 | -14.047 | -0.073 | -15.361 | 1.00 | 16.03 | C |
| ATOM | 1086 | N   | VAL | A | 467 | -15.255 | 0.247  | -12.454 | 1.00 | 14.71 | N |
| ATOM | 1087 | CA  | VAL | A | 467 | -16.164 | -0.139 | -11.382 | 1.00 | 16.32 | C |
| ATOM | 1088 | C   | VAL | A | 467 | -17.634 | -0.039 | -11.786 | 1.00 | 16.93 | C |
| ATOM | 1089 | O   | VAL | A | 467 | -18.078 | 0.975  | -12.322 | 1.00 | 24.45 | O |
| ATOM | 1090 | CB  | VAL | A | 467 | -15.911 | 0.696  | -10.113 | 1.00 | 18.95 | C |
| ATOM | 1091 | CG1 | VAL | A | 467 | -17.090 | 0.586  | -9.152  | 1.00 | 17.25 | C |
| ATOM | 1092 | CG2 | VAL | A | 467 | -14.615 | 0.257  | -9.447  | 1.00 | 12.56 | C |
| ATOM | 1093 | N   | LEU | A | 468 | -18.383 | -1.104 | -11.522 | 1.00 | 15.08 | N |
| ATOM | 1094 | CA  | LEU | A | 468 | -19.797 | -1.152 | -11.864 | 1.00 | 17.66 | C |
| ATOM | 1095 | C   | LEU | A | 468 | -20.607 | -1.773 | -10.733 | 1.00 | 19.42 | C |
| ATOM | 1096 | O   | LEU | A | 468 | -20.444 | -2.951 | -10.418 | 1.00 | 21.98 | O |
| ATOM | 1097 | CB  | LEU | A | 468 | -20.005 | -1.946 | -13.153 | 1.00 | 15.55 | C |
| ATOM | 1098 | CG  | LEU | A | 468 | -21.453 | -2.129 | -13.606 | 1.00 | 19.84 | C |
| ATOM | 1099 | CD1 | LEU | A | 468 | -22.126 | -0.779 | -13.791 | 1.00 | 19.30 | C |
| ATOM | 1100 | CD2 | LEU | A | 468 | -21.512 | -2.941 | -14.890 | 1.00 | 16.61 | C |
| ATOM | 1101 | N   | ASN | A | 469 | -21.477 | -0.975 | -10.123 | 1.00 | 20.89 | N |
| ATOM | 1102 | CA  | ASN | A | 469 | -22.298 | -1.444 | -9.011  | 1.00 | 21.02 | C |
| ATOM | 1103 | C   | ASN | A | 469 | -21.476 | -1.981 | -7.845  | 1.00 | 18.94 | C |
| ATOM | 1104 | O   | ASN | A | 469 | -21.752 | -3.059 | -7.321  | 1.00 | 20.24 | O |
| ATOM | 1105 | CB  | ASN | A | 469 | -23.289 | -2.503 | -9.490  | 1.00 | 17.47 | C |
| ATOM | 1106 | CG  | ASN | A | 469 | -24.369 | -1.922 | -10.372 | 1.00 | 20.12 | C |
| ATOM | 1107 | OD1 | ASN | A | 469 | -24.990 | -0.919 | -10.026 | 1.00 | 23.87 | O |
| ATOM | 1108 | ND2 | ASN | A | 469 | -24.591 | -2.542 | -11.526 | 1.00 | 18.91 | N |
| ATOM | 1109 | N   | ARG | A | 470 | -20.465 | -1.220 | -7.443  | 1.00 | 19.14 | N |
| ATOM | 1110 | CA  | ARG | A | 470 | -19.652 | -1.574 | -6.286  | 1.00 | 20.11 | C |

|      |      |     |     |   |     |         |        |         |      |       |   |
|------|------|-----|-----|---|-----|---------|--------|---------|------|-------|---|
| ATOM | 1111 | C   | ARG | A | 470 | -18.931 | -2.911 | -6.454  | 1.00 | 18.38 | C |
| ATOM | 1112 | O   | ARG | A | 470 | -18.678 | -3.617 | -5.479  | 1.00 | 20.06 | O |
| ATOM | 1113 | CB  | ARG | A | 470 | -20.502 | -1.571 | -5.012  | 1.00 | 21.41 | C |
| ATOM | 1114 | CG  | ARG | A | 470 | -21.008 | -0.187 | -4.621  | 1.00 | 23.05 | C |
| ATOM | 1115 | CD  | ARG | A | 470 | -21.738 | -0.206 | -3.286  | 1.00 | 30.98 | C |
| ATOM | 1116 | NE  | ARG | A | 470 | -21.906 | 1.137  | -2.736  | 1.00 | 34.94 | N |
| ATOM | 1117 | CZ  | ARG | A | 470 | -22.894 | 1.965  | -3.063  | 1.00 | 40.74 | C |
| ATOM | 1118 | NH1 | ARG | A | 470 | -23.811 | 1.592  | -3.947  | 1.00 | 37.80 | N |
| ATOM | 1119 | NH2 | ARG | A | 470 | -22.966 | 3.169  | -2.510  | 1.00 | 37.60 | N |
| ATOM | 1120 | N   | LEU | A | 471 | -18.610 | -3.250 | -7.699  | 1.00 | 15.83 | N |
| ATOM | 1121 | CA  | LEU | A | 471 | -17.757 | -4.395 | -7.997  | 1.00 | 16.23 | C |
| ATOM | 1122 | C   | LEU | A | 471 | -16.596 | -3.935 | -8.874  | 1.00 | 18.15 | C |
| ATOM | 1123 | O   | LEU | A | 471 | -16.788 | -3.169 | -9.819  | 1.00 | 15.68 | O |
| ATOM | 1124 | CB  | LEU | A | 471 | -18.545 | -5.502 | -8.699  | 1.00 | 15.36 | C |
| ATOM | 1125 | CG  | LEU | A | 471 | -19.673 | -6.173 | -7.915  | 1.00 | 17.95 | C |
| ATOM | 1126 | CD1 | LEU | A | 471 | -20.350 | -7.234 | -8.766  | 1.00 | 20.41 | C |
| ATOM | 1127 | CD2 | LEU | A | 471 | -19.150 | -6.780 | -6.625  | 1.00 | 15.77 | C |
| ATOM | 1128 | N   | LEU | A | 472 | -15.393 | -4.401 | -8.557  | 1.00 | 15.34 | N |
| ATOM | 1129 | CA  | LEU | A | 472 | -14.195 | -3.953 | -9.255  | 1.00 | 11.77 | C |
| ATOM | 1130 | C   | LEU | A | 472 | -13.756 | -4.963 | -10.305 | 1.00 | 14.08 | C |
| ATOM | 1131 | O   | LEU | A | 472 | -13.604 | -6.149 | -10.016 | 1.00 | 13.44 | O |
| ATOM | 1132 | CB  | LEU | A | 472 | -13.061 | -3.712 | -8.259  | 1.00 | 15.34 | C |
| ATOM | 1133 | CG  | LEU | A | 472 | -11.772 | -3.107 | -8.816  | 1.00 | 16.43 | C |
| ATOM | 1134 | CD1 | LEU | A | 472 | -11.974 | -1.640 | -9.162  | 1.00 | 15.82 | C |
| ATOM | 1135 | CD2 | LEU | A | 472 | -10.632 | -3.277 | -7.824  | 1.00 | 18.28 | C |
| ATOM | 1136 | N   | TYR | A | 473 | -13.544 | -4.486 | -11.525 | 1.00 | 14.72 | N |
| ATOM | 1137 | CA  | TYR | A | 473 | -13.132 | -5.356 | -12.617 | 1.00 | 12.96 | C |
| ATOM | 1138 | C   | TYR | A | 473 | -11.683 | -5.117 | -13.030 | 1.00 | 13.70 | C |
| ATOM | 1139 | O   | TYR | A | 473 | -11.278 | -3.987 | -13.296 | 1.00 | 13.34 | O |
| ATOM | 1140 | CB  | TYR | A | 473 | -14.062 | -5.180 | -13.818 | 1.00 | 14.94 | C |
| ATOM | 1141 | CG  | TYR | A | 473 | -15.485 | -5.609 | -13.545 | 1.00 | 20.47 | C |
| ATOM | 1142 | CD1 | TYR | A | 473 | -16.384 | -4.752 | -12.920 | 1.00 | 16.93 | C |
| ATOM | 1143 | CD2 | TYR | A | 473 | -15.930 | -6.872 | -13.911 | 1.00 | 16.46 | C |
| ATOM | 1144 | CE1 | TYR | A | 473 | -17.687 | -5.144 | -12.667 | 1.00 | 18.69 | C |
| ATOM | 1145 | CE2 | TYR | A | 473 | -17.230 | -7.272 | -13.665 | 1.00 | 24.26 | C |
| ATOM | 1146 | CZ  | TYR | A | 473 | -18.106 | -6.405 | -13.043 | 1.00 | 23.16 | C |
| ATOM | 1147 | OH  | TYR | A | 473 | -19.401 | -6.805 | -12.798 | 1.00 | 16.34 | O |
| ATOM | 1148 | N   | ALA | A | 474 | -10.904 | -6.191 | -13.067 | 1.00 | 14.08 | N |
| ATOM | 1149 | CA  | ALA | A | 474 | -9.545  | -6.132 | -13.584 | 1.00 | 15.56 | C |
| ATOM | 1150 | C   | ALA | A | 474 | -9.534  | -6.808 | -14.945 | 1.00 | 13.29 | C |
| ATOM | 1151 | O   | ALA | A | 474 | -9.877  | -7.985 | -15.059 | 1.00 | 11.68 | O |
| ATOM | 1152 | CB  | ALA | A | 474 | -8.584  | -6.823 | -12.635 | 1.00 | 13.57 | C |
| ATOM | 1153 | N   | VAL | A | 475 | -9.149  | -6.065 | -15.977 | 1.00 | 16.55 | N |
| ATOM | 1154 | CA  | VAL | A | 475 | -9.263  | -6.558 | -17.346 | 1.00 | 13.09 | C |
| ATOM | 1155 | C   | VAL | A | 475 | -7.930  | -6.620 | -18.088 | 1.00 | 15.85 | C |
| ATOM | 1156 | O   | VAL | A | 475 | -7.153  | -5.664 | -18.080 | 1.00 | 16.42 | O |



|      |      |     |     |       |         |         |         |      |       |   |
|------|------|-----|-----|-------|---------|---------|---------|------|-------|---|
| ATOM | 1157 | CB  | VAL | A 475 | -10.253 | -5.710  | -18.158 | 1.00 | 8.87  | C |
| ATOM | 1158 | CG1 | VAL | A 475 | -10.392 | -6.260  | -19.566 | 1.00 | 10.29 | C |
| ATOM | 1159 | CG2 | VAL | A 475 | -11.601 | -5.674  | -17.462 | 1.00 | 10.39 | C |
| ATOM | 1160 | N   | GLY | A 476 | -7.680  | -7.757  | -18.731 | 1.00 | 11.82 | N |
| ATOM | 1161 | CA  | GLY | A 476 | -6.484  | -7.951  | -19.528 | 1.00 | 11.16 | C |
| ATOM | 1162 | C   | GLY | A 476 | -5.197  | -7.708  | -18.767 | 1.00 | 13.57 | C |
| ATOM | 1163 | O   | GLY | A 476 | -5.175  | -7.708  | -17.535 | 1.00 | 13.40 | O |
| ATOM | 1164 | N   | GLY | A 477 | -4.117  | -7.505  | -19.511 | 1.00 | 14.84 | N |
| ATOM | 1165 | CA  | GLY | A 477 | -2.828  | -7.218  | -18.914 | 1.00 | 15.74 | C |
| ATOM | 1166 | C   | GLY | A 477 | -1.753  | -8.197  | -19.338 | 1.00 | 17.12 | C |
| ATOM | 1167 | O   | GLY | A 477 | -1.889  | -8.896  | -20.341 | 1.00 | 15.03 | O |
| ATOM | 1168 | N   | PHE | A 478 | -0.680  | -8.244  | -18.557 | 1.00 | 16.99 | N |
| ATOM | 1169 | CA  | PHE | A 478 | 0.465   | -9.090  | -18.855 | 1.00 | 17.30 | C |
| ATOM | 1170 | C   | PHE | A 478 | 0.951   | -9.727  | -17.559 | 1.00 | 17.01 | C |
| ATOM | 1171 | O   | PHE | A 478 | 1.357   | -9.027  | -16.631 | 1.00 | 16.40 | O |
| ATOM | 1172 | CB  | PHE | A 478 | 1.571   | -8.252  | -19.500 | 1.00 | 18.02 | C |
| ATOM | 1173 | CG  | PHE | A 478 | 2.779   | -9.042  | -19.914 | 1.00 | 21.05 | C |
| ATOM | 1174 | CD1 | PHE | A 478 | 2.682   | -10.032 | -20.878 | 1.00 | 19.79 | C |
| ATOM | 1175 | CD2 | PHE | A 478 | 4.020   | -8.775  | -19.359 | 1.00 | 21.51 | C |
| ATOM | 1176 | CE1 | PHE | A 478 | 3.795   | -10.753 | -21.267 | 1.00 | 19.44 | C |
| ATOM | 1177 | CE2 | PHE | A 478 | 5.138   | -9.491  | -19.744 | 1.00 | 21.44 | C |
| ATOM | 1178 | CZ  | PHE | A 478 | 5.025   | -10.482 | -20.699 | 1.00 | 23.20 | C |
| ATOM | 1179 | N   | ASP | A 479 | 0.893   | -11.054 | -17.493 | 1.00 | 18.26 | N |
| ATOM | 1180 | CA  | ASP | A 479 | 1.220   | -11.772 | -16.263 | 1.00 | 20.33 | C |
| ATOM | 1181 | C   | ASP | A 479 | 2.715   | -12.019 | -16.112 | 1.00 | 18.96 | C |
| ATOM | 1182 | O   | ASP | A 479 | 3.141   | -12.774 | -15.238 | 1.00 | 22.80 | O |
| ATOM | 1183 | CB  | ASP | A 479 | 0.461   | -13.099 | -16.194 | 1.00 | 18.41 | C |
| ATOM | 1184 | CG  | ASP | A 479 | 0.820   | -14.036 | -17.329 | 1.00 | 21.15 | C |
| ATOM | 1185 | OD1 | ASP | A 479 | 1.983   | -14.009 | -17.782 | 1.00 | 23.88 | O |
| ATOM | 1186 | OD2 | ASP | A 479 | -0.064  | -14.799 | -17.769 | 1.00 | 25.44 | O |
| ATOM | 1187 | N   | GLY | A 480 | 3.509   | -11.382 | -16.964 | 1.00 | 20.21 | N |
| ATOM | 1188 | CA  | GLY | A 480 | 4.950   | -11.538 | -16.913 | 1.00 | 26.25 | C |
| ATOM | 1189 | C   | GLY | A 480 | 5.466   | -12.537 | -17.930 | 1.00 | 25.71 | C |
| ATOM | 1190 | O   | GLY | A 480 | 6.660   | -12.574 | -18.224 | 1.00 | 27.04 | O |
| ATOM | 1191 | N   | THR | A 481 | 4.564   | -13.354 | -18.465 | 1.00 | 21.47 | N |
| ATOM | 1192 | CA  | THR | A 481 | 4.928   | -14.330 | -19.485 | 1.00 | 24.53 | C |
| ATOM | 1193 | C   | THR | A 481 | 4.041   | -14.198 | -20.715 | 1.00 | 24.80 | C |
| ATOM | 1194 | O   | THR | A 481 | 4.533   | -14.146 | -21.842 | 1.00 | 28.36 | O |
| ATOM | 1195 | CB  | THR | A 481 | 4.847   | -15.773 | -18.956 | 1.00 | 29.94 | C |
| ATOM | 1196 | OG1 | THR | A 481 | 5.908   | -16.002 | -18.020 | 1.00 | 26.32 | O |
| ATOM | 1197 | CG2 | THR | A 481 | 4.974   | -16.765 | -20.101 | 1.00 | 22.59 | C |
| ATOM | 1198 | N   | ASN | A 482 | 2.732   | -14.141 | -20.492 | 1.00 | 22.89 | N |
| ATOM | 1199 | CA  | ASN | A 482 | 1.773   | -14.033 | -21.586 | 1.00 | 25.15 | C |
| ATOM | 1200 | C   | ASN | A 482 | 0.844   | -12.835 | -21.450 | 1.00 | 26.82 | C |
| ATOM | 1201 | O   | ASN | A 482 | 0.480   | -12.438 | -20.343 | 1.00 | 26.92 | O |
| ATOM | 1202 | CB  | ASN | A 482 | 0.937   | -15.311 | -21.697 | 1.00 | 25.12 | C |

|      |      |     |     |       |         |         |         |      |       |   |
|------|------|-----|-----|-------|---------|---------|---------|------|-------|---|
| ATOM | 1203 | CG  | ASN | A 482 | 1.723   | -16.474 | -22.264 | 1.00 | 32.70 | C |
| ATOM | 1204 | OD1 | ASN | A 482 | 1.926   | -17.486 | -21.593 | 1.00 | 32.86 | O |
| ATOM | 1205 | ND2 | ASN | A 482 | 2.166   | -16.338 | -23.509 | 1.00 | 33.73 | N |
| ATOM | 1206 | N   | ARG | A 483 | 0.464   | -12.262 | -22.586 | 1.00 | 24.58 | N |
| ATOM | 1207 | CA  | ARG | A 483 | -0.546  | -11.218 | -22.607 | 1.00 | 21.47 | C |
| ATOM | 1208 | C   | ARG | A 483 | -1.900  | -11.863 | -22.330 | 1.00 | 19.22 | C |
| ATOM | 1209 | O   | ARG | A 483 | -2.136  | -13.010 | -22.709 | 1.00 | 21.63 | O |
| ATOM | 1210 | CB  | ARG | A 483 | -0.543  | -10.504 | -23.957 | 1.00 | 19.49 | C |
| ATOM | 1211 | CG  | ARG | A 483 | -0.805  | -9.015  | -23.863 | 1.00 | 18.78 | C |
| ATOM | 1212 | CD  | ARG | A 483 | -0.032  | -8.263  | -24.930 | 1.00 | 22.29 | C |
| ATOM | 1213 | NE  | ARG | A 483 | 1.403   | -8.521  | -24.847 | 1.00 | 22.34 | N |
| ATOM | 1214 | CZ  | ARG | A 483 | 2.235   | -7.871  | -24.040 | 1.00 | 18.82 | C |
| ATOM | 1215 | NH1 | ARG | A 483 | 1.777   | -6.924  | -23.233 | 1.00 | 25.28 | N |
| ATOM | 1216 | NH2 | ARG | A 483 | 3.525   | -8.173  | -24.034 | 1.00 | 18.55 | N |
| ATOM | 1217 | N   | LEU | A 484 | -2.787  | -11.129 | -21.668 | 1.00 | 19.72 | N |
| ATOM | 1218 | CA  | LEU | A 484 | -4.026  | -11.708 | -21.162 | 1.00 | 16.58 | C |
| ATOM | 1219 | C   | LEU | A 484 | -5.265  | -11.213 | -21.896 | 1.00 | 14.34 | C |
| ATOM | 1220 | O   | LEU | A 484 | -5.340  | -10.055 | -22.302 | 1.00 | 17.57 | O |
| ATOM | 1221 | CB  | LEU | A 484 | -4.173  | -11.395 | -19.671 | 1.00 | 17.29 | C |
| ATOM | 1222 | CG  | LEU | A 484 | -2.956  | -11.666 | -18.782 | 1.00 | 18.08 | C |
| ATOM | 1223 | CD1 | LEU | A 484 | -3.158  | -11.054 | -17.403 | 1.00 | 12.38 | C |
| ATOM | 1224 | CD2 | LEU | A 484 | -2.685  | -13.161 | -18.681 | 1.00 | 14.19 | C |
| ATOM | 1225 | N   | ASN | A 485 | -6.238  | -12.103 | -22.061 | 1.00 | 15.69 | N |
| ATOM | 1226 | CA  | ASN | A 485 | -7.568  | -11.708 | -22.501 | 1.00 | 13.13 | C |
| ATOM | 1227 | C   | ASN | A 485 | -8.572  | -11.911 | -21.370 | 1.00 | 15.18 | C |
| ATOM | 1228 | O   | ASN | A 485 | -9.717  | -11.465 | -21.449 | 1.00 | 15.59 | O |
| ATOM | 1229 | CB  | ASN | A 485 | -7.996  | -12.485 | -23.749 | 1.00 | 17.28 | C |
| ATOM | 1230 | CG  | ASN | A 485 | -8.249  | -13.961 | -23.471 | 1.00 | 16.37 | C |
| ATOM | 1231 | OD1 | ASN | A 485 | -8.221  | -14.409 | -22.326 | 1.00 | 21.27 | O |
| ATOM | 1232 | ND2 | ASN | A 485 | -8.509  | -14.721 | -24.527 | 1.00 | 16.63 | N |
| ATOM | 1233 | N   | SER | A 486 | -8.123  | -12.581 | -20.312 | 1.00 | 12.05 | N |
| ATOM | 1234 | CA  | SER | A 486 | -8.984  | -12.906 | -19.180 | 1.00 | 15.23 | C |
| ATOM | 1235 | C   | SER | A 486 | -9.322  | -11.677 | -18.343 | 1.00 | 15.78 | C |
| ATOM | 1236 | O   | SER | A 486 | -8.596  | -10.682 | -18.350 | 1.00 | 14.93 | O |
| ATOM | 1237 | CB  | SER | A 486 | -8.340  | -13.980 | -18.297 | 1.00 | 16.14 | C |
| ATOM | 1238 | OG  | SER | A 486 | -7.179  | -13.488 | -17.645 | 1.00 | 16.35 | O |
| ATOM | 1239 | N   | ALA | A 487 | -10.434 | -11.760 | -17.622 | 1.00 | 18.12 | N |
| ATOM | 1240 | CA  | ALA | A 487 | -10.872 | -10.683 | -16.747 | 1.00 | 15.85 | C |
| ATOM | 1241 | C   | ALA | A 487 | -11.466 | -11.275 | -15.476 | 1.00 | 13.43 | C |
| ATOM | 1242 | O   | ALA | A 487 | -12.014 | -12.375 | -15.496 | 1.00 | 16.13 | O |
| ATOM | 1243 | CB  | ALA | A 487 | -11.892 | -9.810  | -17.457 | 1.00 | 14.01 | C |
| ATOM | 1244 | N   | GLU | A 488 | -11.356 | -10.548 | -14.370 | 1.00 | 17.34 | N |
| ATOM | 1245 | CA  | GLU | A 488 | -11.879 | -11.029 | -13.096 | 1.00 | 13.89 | C |
| ATOM | 1246 | C   | GLU | A 488 | -12.593 | -9.936  | -12.306 | 1.00 | 14.51 | C |
| ATOM | 1247 | O   | GLU | A 488 | -12.403 | -8.747  | -12.554 | 1.00 | 15.43 | O |
| ATOM | 1248 | CB  | GLU | A 488 | -10.768 | -11.668 | -12.261 | 1.00 | 15.38 | C |

|      |      |     |     |       |         |         |         |      |       |   |
|------|------|-----|-----|-------|---------|---------|---------|------|-------|---|
| ATOM | 1249 | CG  | GLU | A 488 | -9.463  | -10.894 | -12.260 | 1.00 | 16.73 | C |
| ATOM | 1250 | CD  | GLU | A 488 | -8.373  | -11.610 | -11.491 | 1.00 | 16.76 | C |
| ATOM | 1251 | OE1 | GLU | A 488 | -8.523  | -11.766 | -10.262 | 1.00 | 15.08 | O |
| ATOM | 1252 | OE2 | GLU | A 488 | -7.370  | -12.022 | -12.115 | 1.00 | 17.35 | O |
| ATOM | 1253 | N   | CYS | A 489 | -13.416 | -10.354 | -11.352 | 1.00 | 18.81 | N |
| ATOM | 1254 | CA  | CYS | A 489 | -14.264 | -9.429  | -10.614 | 1.00 | 16.46 | C |
| ATOM | 1255 | C   | CYS | A 489 | -13.984 | -9.482  | -9.116  | 1.00 | 18.58 | C |
| ATOM | 1256 | O   | CYS | A 489 | -13.845 | -10.560 | -8.537  | 1.00 | 18.04 | O |
| ATOM | 1257 | CB  | CYS | A 489 | -15.735 | -9.745  | -10.887 | 1.00 | 20.02 | C |
| ATOM | 1258 | SG  | CYS | A 489 | -16.895 | -8.515  | -10.276 | 1.00 | 20.30 | S |
| ATOM | 1259 | N   | TYR | A 490 | -13.903 | -8.311  | -8.494  | 1.00 | 17.88 | N |
| ATOM | 1260 | CA  | TYR | A 490 | -13.658 | -8.225  | -7.060  | 1.00 | 15.81 | C |
| ATOM | 1261 | C   | TYR | A 490 | -14.930 | -7.864  | -6.293  | 1.00 | 18.89 | C |
| ATOM | 1262 | O   | TYR | A 490 | -15.586 | -6.866  | -6.594  | 1.00 | 18.12 | O |
| ATOM | 1263 | CB  | TYR | A 490 | -12.554 | -7.207  | -6.762  | 1.00 | 15.68 | C |
| ATOM | 1264 | CG  | TYR | A 490 | -12.280 | -7.024  | -5.284  | 1.00 | 18.49 | C |
| ATOM | 1265 | CD1 | TYR | A 490 | -11.539 | -7.960  | -4.575  | 1.00 | 16.55 | C |
| ATOM | 1266 | CD2 | TYR | A 490 | -12.764 | -5.917  | -4.600  | 1.00 | 15.78 | C |
| ATOM | 1267 | CE1 | TYR | A 490 | -11.289 | -7.800  | -3.226  | 1.00 | 18.44 | C |
| ATOM | 1268 | CE2 | TYR | A 490 | -12.519 | -5.748  | -3.251  | 1.00 | 17.52 | C |
| ATOM | 1269 | CZ  | TYR | A 490 | -11.781 | -6.692  | -2.569  | 1.00 | 17.70 | C |
| ATOM | 1270 | OH  | TYR | A 490 | -11.535 | -6.529  | -1.225  | 1.00 | 19.19 | O |
| ATOM | 1271 | N   | TYR | A 491 | -15.269 | -8.681  | -5.300  | 1.00 | 18.28 | N |
| ATOM | 1272 | CA  | TYR | A 491 | -16.446 | -8.446  | -4.470  | 1.00 | 17.46 | C |
| ATOM | 1273 | C   | TYR | A 491 | -16.053 | -7.929  | -3.090  | 1.00 | 17.20 | C |
| ATOM | 1274 | O   | TYR | A 491 | -15.729 | -8.711  | -2.197  | 1.00 | 22.61 | O |
| ATOM | 1275 | CB  | TYR | A 491 | -17.270 | -9.727  | -4.345  | 1.00 | 18.48 | C |
| ATOM | 1276 | CG  | TYR | A 491 | -17.778 | -10.239 | -5.673  | 1.00 | 13.98 | C |
| ATOM | 1277 | CD1 | TYR | A 491 | -16.945 | -10.948 | -6.530  | 1.00 | 19.92 | C |
| ATOM | 1278 | CD2 | TYR | A 491 | -19.085 | -10.004 | -6.076  | 1.00 | 14.29 | C |
| ATOM | 1279 | CE1 | TYR | A 491 | -17.401 | -11.412 | -7.750  | 1.00 | 23.50 | C |
| ATOM | 1280 | CE2 | TYR | A 491 | -19.553 | -10.466 | -7.293  | 1.00 | 20.08 | C |
| ATOM | 1281 | CZ  | TYR | A 491 | -18.705 | -11.169 | -8.126  | 1.00 | 22.86 | C |
| ATOM | 1282 | OH  | TYR | A 491 | -19.159 | -11.631 | -9.339  | 1.00 | 27.49 | O |
| ATOM | 1283 | N   | PRO | A 492 | -16.084 | -6.598  | -2.915  | 1.00 | 18.13 | N |
| ATOM | 1284 | CA  | PRO | A 492 | -15.642 | -5.920  | -1.690  | 1.00 | 21.31 | C |
| ATOM | 1285 | C   | PRO | A 492 | -16.259 | -6.533  | -0.431  | 1.00 | 24.50 | C |
| ATOM | 1286 | O   | PRO | A 492 | -15.551 | -6.762  | 0.550   | 1.00 | 19.81 | O |
| ATOM | 1287 | CB  | PRO | A 492 | -16.159 | -4.489  | -1.882  | 1.00 | 15.39 | C |
| ATOM | 1288 | CG  | PRO | A 492 | -16.194 | -4.305  | -3.357  | 1.00 | 18.40 | C |
| ATOM | 1289 | CD  | PRO | A 492 | -16.567 | -5.646  | -3.932  | 1.00 | 18.87 | C |
| ATOM | 1290 | N   | GLU | A 493 | -17.562 | -6.795  | -0.463  | 1.00 | 21.03 | N |
| ATOM | 1291 | CA  | GLU | A 493 | -18.257 | -7.300  | 0.711   | 1.00 | 24.98 | C |
| ATOM | 1292 | C   | GLU | A 493 | -17.856 | -8.729  | 1.064   | 1.00 | 18.81 | C |
| ATOM | 1293 | O   | GLU | A 493 | -18.314 | -9.283  | 2.063   | 1.00 | 19.43 | O |
| ATOM | 1294 | CB  | GLU | A 493 | -19.774 | -7.185  | 0.527   | 1.00 | 28.82 | C |

|      |      |     |     |   |     |         |         |        |      |       |   |
|------|------|-----|-----|---|-----|---------|---------|--------|------|-------|---|
| ATOM | 1295 | CG  | GLU | A | 493 | -20.297 | -5.768  | 0.344  | 1.00 | 34.30 | C |
| ATOM | 1296 | CD  | GLU | A | 493 | -21.788 | -5.716  | 0.078  | 1.00 | 43.34 | C |
| ATOM | 1297 | OE1 | GLU | A | 493 | -22.403 | -6.794  | -0.035 | 1.00 | 46.58 | O |
| ATOM | 1298 | OE2 | GLU | A | 493 | -22.335 | -4.594  | -0.013 | 1.00 | 46.59 | O |
| ATOM | 1299 | N   | ARG | A | 494 | -17.011 | -9.328  | 0.231  | 1.00 | 23.59 | N |
| ATOM | 1300 | CA  | ARG | A | 494 | -16.528 | -10.684 | 0.482  | 1.00 | 20.02 | C |
| ATOM | 1301 | C   | ARG | A | 494 | -15.005 | -10.748 | 0.461  | 1.00 | 25.68 | C |
| ATOM | 1302 | O   | ARG | A | 494 | -14.408 | -11.739 | 0.883  | 1.00 | 21.68 | O |
| ATOM | 1303 | CB  | ARG | A | 494 | -17.091 | -11.660 | -0.551 | 1.00 | 21.57 | C |
| ATOM | 1304 | CG  | ARG | A | 494 | -18.595 | -11.573 | -0.724 | 1.00 | 30.83 | C |
| ATOM | 1305 | CD  | ARG | A | 494 | -19.071 | -12.538 | -1.796 | 1.00 | 35.73 | C |
| ATOM | 1306 | NE  | ARG | A | 494 | -18.770 | -13.923 | -1.448 | 1.00 | 39.67 | N |
| ATOM | 1307 | CZ  | ARG | A | 494 | -18.909 | -14.948 | -2.283 | 1.00 | 40.77 | C |
| ATOM | 1308 | NH1 | ARG | A | 494 | -19.340 | -14.743 | -3.520 | 1.00 | 38.82 | N |
| ATOM | 1309 | NH2 | ARG | A | 494 | -18.610 | -16.177 | -1.885 | 1.00 | 38.12 | N |
| ATOM | 1310 | N   | ASN | A | 495 | -14.382 | -9.680  | -0.028 | 1.00 | 24.91 | N |
| ATOM | 1311 | CA  | ASN | A | 495 | -12.932 | -9.633  | -0.198 | 1.00 | 18.47 | C |
| ATOM | 1312 | C   | ASN | A | 495 | -12.409 | -10.844 | -0.962 | 1.00 | 20.32 | C |
| ATOM | 1313 | O   | ASN | A | 495 | -11.449 | -11.491 | -0.542 | 1.00 | 20.27 | O |
| ATOM | 1314 | CB  | ASN | A | 495 | -12.223 | -9.530  | 1.154  | 1.00 | 19.49 | C |
| ATOM | 1315 | CG  | ASN | A | 495 | -10.718 | -9.367  | 1.010  | 1.00 | 20.51 | C |
| ATOM | 1316 | OD1 | ASN | A | 495 | -10.233 | -8.826  | 0.015  | 1.00 | 16.37 | O |
| ATOM | 1317 | ND2 | ASN | A | 495 | -9.973  | -9.845  | 2.000  | 1.00 | 15.16 | N |
| ATOM | 1318 | N   | GLU | A | 496 | -13.044 | -11.151 | -2.085 | 1.00 | 22.42 | N |
| ATOM | 1319 | CA  | GLU | A | 496 | -12.608 | -12.269 | -2.908 | 1.00 | 23.52 | C |
| ATOM | 1320 | C   | GLU | A | 496 | -12.703 | -11.927 | -4.390 | 1.00 | 21.30 | C |
| ATOM | 1321 | O   | GLU | A | 496 | -13.522 | -11.104 | -4.797 | 1.00 | 17.40 | O |
| ATOM | 1322 | CB  | GLU | A | 496 | -13.428 | -13.523 | -2.600 | 1.00 | 22.59 | C |
| ATOM | 1323 | CG  | GLU | A | 496 | -14.834 | -13.501 | -3.174 | 1.00 | 32.52 | C |
| ATOM | 1324 | CD  | GLU | A | 496 | -15.594 | -14.784 | -2.898 | 1.00 | 39.27 | C |
| ATOM | 1325 | OE1 | GLU | A | 496 | -15.380 | -15.383 | -1.822 | 1.00 | 41.57 | O |
| ATOM | 1326 | OE2 | GLU | A | 496 | -16.400 | -15.197 | -3.761 | 1.00 | 42.84 | O |
| ATOM | 1327 | N   | TRP | A | 497 | -11.853 | -12.561 | -5.187 | 1.00 | 16.74 | N |
| ATOM | 1328 | CA  | TRP | A | 497 | -11.865 | -12.367 | -6.627 | 1.00 | 15.35 | C |
| ATOM | 1329 | C   | TRP | A | 497 | -12.526 | -13.549 | -7.319 | 1.00 | 18.14 | C |
| ATOM | 1330 | O   | TRP | A | 497 | -12.424 | -14.689 | -6.865 | 1.00 | 22.02 | O |
| ATOM | 1331 | CB  | TRP | A | 497 | -10.443 | -12.161 | -7.152 | 1.00 | 12.80 | C |
| ATOM | 1332 | CG  | TRP | A | 497 | -9.907  | -10.802 | -6.850 | 1.00 | 16.75 | C |
| ATOM | 1333 | CD1 | TRP | A | 497 | -9.271  | -10.406 | -5.710 | 1.00 | 18.85 | C |
| ATOM | 1334 | CD2 | TRP | A | 497 | -9.974  | -9.647  | -7.695 | 1.00 | 16.27 | C |
| ATOM | 1335 | NE1 | TRP | A | 497 | -8.933  | -9.076  | -5.795 | 1.00 | 16.08 | N |
| ATOM | 1336 | CE2 | TRP | A | 497 | -9.354  | -8.588  | -7.004 | 1.00 | 16.29 | C |
| ATOM | 1337 | CE3 | TRP | A | 497 | -10.495 | -9.407  | -8.970 | 1.00 | 18.84 | C |
| ATOM | 1338 | CZ2 | TRP | A | 497 | -9.241  | -7.309  | -7.545 | 1.00 | 16.45 | C |
| ATOM | 1339 | CZ3 | TRP | A | 497 | -10.381 | -8.136  | -9.506 | 1.00 | 16.47 | C |
| ATOM | 1340 | CH2 | TRP | A | 497 | -9.759  | -7.104  | -8.794 | 1.00 | 14.65 | C |

|      |      |     |     |   |     |         |         |         |      |       |   |
|------|------|-----|-----|---|-----|---------|---------|---------|------|-------|---|
| ATOM | 1341 | N   | ARG | A | 498 | -13.211 | -13.265 | -8.418  | 1.00 | 12.72 | N |
| ATOM | 1342 | CA  | ARG | A | 498 | -13.884 | -14.296 | -9.187  | 1.00 | 16.44 | C |
| ATOM | 1343 | C   | ARG | A | 498 | -13.702 | -14.026 | -10.681 | 1.00 | 19.70 | C |
| ATOM | 1344 | O   | ARG | A | 498 | -14.091 | -12.970 | -11.181 | 1.00 | 20.44 | O |
| ATOM | 1345 | CB  | ARG | A | 498 | -15.369 | -14.325 | -8.823  | 1.00 | 18.35 | C |
| ATOM | 1346 | CG  | ARG | A | 498 | -16.144 | -15.463 | -9.453  | 1.00 | 29.00 | C |
| ATOM | 1347 | CD  | ARG | A | 498 | -17.643 | -15.200 | -9.407  | 1.00 | 29.79 | C |
| ATOM | 1348 | NE  | ARG | A | 498 | -18.294 | -15.815 | -8.254  | 1.00 | 38.18 | N |
| ATOM | 1349 | CZ  | ARG | A | 498 | -18.389 | -15.251 | -7.054  | 1.00 | 40.94 | C |
| ATOM | 1350 | NH1 | ARG | A | 498 | -17.862 | -14.055 | -6.836  | 1.00 | 37.49 | N |
| ATOM | 1351 | NH2 | ARG | A | 498 | -19.007 | -15.887 | -6.068  | 1.00 | 48.77 | N |
| ATOM | 1352 | N   | MET | A | 499 | -13.095 | -14.970 | -11.392 | 1.00 | 19.82 | N |
| ATOM | 1353 | CA  | MET | A | 499 | -12.900 | -14.808 | -12.827 | 1.00 | 20.11 | C |
| ATOM | 1354 | C   | MET | A | 499 | -14.241 | -14.578 | -13.510 | 1.00 | 21.56 | C |
| ATOM | 1355 | O   | MET | A | 499 | -15.268 | -15.104 | -13.078 | 1.00 | 21.93 | O |
| ATOM | 1356 | CB  | MET | A | 499 | -12.217 | -16.037 | -13.432 | 1.00 | 17.70 | C |
| ATOM | 1357 | CG  | MET | A | 499 | -10.809 | -16.306 | -12.916 | 1.00 | 21.54 | C |
| ATOM | 1358 | SD  | MET | A | 499 | -9.592  | -15.074 | -13.421 | 1.00 | 32.60 | S |
| ATOM | 1359 | CE  | MET | A | 499 | -9.714  | -15.155 | -15.205 | 1.00 | 15.21 | C |
| ATOM | 1360 | N   | ILE | A | 500 | -14.230 | -13.779 | -14.570 | 1.00 | 19.14 | N |
| ATOM | 1361 | CA  | ILE | A | 500 | -15.411 | -13.605 | -15.400 | 1.00 | 18.24 | C |
| ATOM | 1362 | C   | ILE | A | 500 | -15.099 | -14.131 | -16.790 | 1.00 | 18.58 | C |
| ATOM | 1363 | O   | ILE | A | 500 | -14.040 | -14.716 | -17.015 | 1.00 | 16.81 | O |
| ATOM | 1364 | CB  | ILE | A | 500 | -15.832 | -12.129 | -15.504 | 1.00 | 19.17 | C |
| ATOM | 1365 | CG1 | ILE | A | 500 | -14.845 | -11.353 | -16.382 | 1.00 | 18.24 | C |
| ATOM | 1366 | CG2 | ILE | A | 500 | -15.946 | -11.511 | -14.117 | 1.00 | 19.84 | C |
| ATOM | 1367 | CD1 | ILE | A | 500 | -15.274 | -9.933  | -16.683 | 1.00 | 15.64 | C |
| ATOM | 1368 | N   | THR | A | 501 | -16.020 | -13.927 | -17.722 | 1.00 | 18.72 | N |
| ATOM | 1369 | CA  | THR | A | 501 | -15.791 | -14.344 | -19.094 | 1.00 | 17.08 | C |
| ATOM | 1370 | C   | THR | A | 501 | -14.641 | -13.531 | -19.681 | 1.00 | 17.34 | C |
| ATOM | 1371 | O   | THR | A | 501 | -14.543 | -12.325 | -19.448 | 1.00 | 19.37 | O |
| ATOM | 1372 | CB  | THR | A | 501 | -17.052 | -14.163 | -19.953 | 1.00 | 22.04 | C |
| ATOM | 1373 | OG1 | THR | A | 501 | -18.176 | -14.740 | -19.277 | 1.00 | 16.25 | O |
| ATOM | 1374 | CG2 | THR | A | 501 | -16.876 | -14.835 | -21.310 | 1.00 | 18.61 | C |
| ATOM | 1375 | N   | ALA | A | 502 | -13.768 | -14.194 | -20.432 | 1.00 | 15.02 | N |
| ATOM | 1376 | CA  | ALA | A | 502 | -12.620 | -13.529 | -21.038 | 1.00 | 14.71 | C |
| ATOM | 1377 | C   | ALA | A | 502 | -13.041 | -12.683 | -22.235 | 1.00 | 15.25 | C |
| ATOM | 1378 | O   | ALA | A | 502 | -14.133 | -12.857 | -22.774 | 1.00 | 18.85 | O |
| ATOM | 1379 | CB  | ALA | A | 502 | -11.571 | -14.551 | -21.449 | 1.00 | 10.87 | C |
| ATOM | 1380 | N   | MET | A | 503 | -12.175 | -11.758 | -22.639 | 1.00 | 17.30 | N |
| ATOM | 1381 | CA  | MET | A | 503 | -12.430 | -10.938 | -23.816 | 1.00 | 17.51 | C |
| ATOM | 1382 | C   | MET | A | 503 | -12.178 | -11.772 | -25.061 | 1.00 | 17.52 | C |
| ATOM | 1383 | O   | MET | A | 503 | -11.488 | -12.789 | -25.001 | 1.00 | 16.49 | O |
| ATOM | 1384 | CB  | MET | A | 503 | -11.505 | -9.718  | -23.844 | 1.00 | 15.55 | C |
| ATOM | 1385 | CG  | MET | A | 503 | -11.519 | -8.863  | -22.589 | 1.00 | 19.31 | C |
| ATOM | 1386 | SD  | MET | A | 503 | -10.364 | -7.479  | -22.717 | 1.00 | 14.37 | S |

|      |      |     |           |         |         |         |      |       |   |
|------|------|-----|-----------|---------|---------|---------|------|-------|---|
| ATOM | 1387 | CE  | MET A 503 | -11.173 | -6.491  | -23.970 | 1.00 | 18.66 | C |
| ATOM | 1388 | N   | ASN A 504 | -12.731 | -11.343 | -26.189 | 1.00 | 14.94 | N |
| ATOM | 1389 | CA  | ASN A 504 | -12.438 | -11.996 | -27.454 | 1.00 | 14.80 | C |
| ATOM | 1390 | C   | ASN A 504 | -10.987 | -11.748 | -27.840 | 1.00 | 16.74 | C |
| ATOM | 1391 | O   | ASN A 504 | -10.376 | -12.543 | -28.553 | 1.00 | 19.65 | O |
| ATOM | 1392 | CB  | ASN A 504 | -13.363 | -11.482 | -28.555 | 1.00 | 16.19 | C |
| ATOM | 1393 | CG  | ASN A 504 | -14.826 | -11.697 | -28.233 | 1.00 | 17.25 | C |
| ATOM | 1394 | OD1 | ASN A 504 | -15.536 | -10.764 | -27.858 | 1.00 | 16.05 | O |
| ATOM | 1395 | ND2 | ASN A 504 | -15.285 | -12.935 | -28.374 | 1.00 | 19.45 | N |
| ATOM | 1396 | N   | THR A 505 | -10.437 | -10.642 | -27.349 | 1.00 | 14.61 | N |
| ATOM | 1397 | CA  | THR A 505 | -9.098  | -10.221 | -27.735 | 1.00 | 12.91 | C |
| ATOM | 1398 | C   | THR A 505 | -8.128  | -10.180 | -26.556 | 1.00 | 17.01 | C |
| ATOM | 1399 | O   | THR A 505 | -8.506  | -9.845  | -25.433 | 1.00 | 16.38 | O |
| ATOM | 1400 | CB  | THR A 505 | -9.128  | -8.829  | -28.391 | 1.00 | 12.54 | C |
| ATOM | 1401 | OG1 | THR A 505 | -10.207 | -8.765  | -29.330 | 1.00 | 13.76 | O |
| ATOM | 1402 | CG2 | THR A 505 | -7.814  | -8.545  | -29.104 | 1.00 | 12.13 | C |
| ATOM | 1403 | N   | ILE A 506 | -6.876  | -10.530 | -26.826 | 1.00 | 16.39 | N |
| ATOM | 1404 | CA  | ILE A 506 | -5.799  | -10.360 | -25.861 | 1.00 | 16.77 | C |
| ATOM | 1405 | C   | ILE A 506 | -5.419  | -8.885  | -25.802 | 1.00 | 18.40 | C |
| ATOM | 1406 | O   | ILE A 506 | -5.104  | -8.278  | -26.828 | 1.00 | 14.52 | O |
| ATOM | 1407 | CB  | ILE A 506 | -4.560  | -11.178 | -26.262 | 1.00 | 20.40 | C |
| ATOM | 1408 | CG1 | ILE A 506 | -4.880  | -12.675 | -26.244 | 1.00 | 19.86 | C |
| ATOM | 1409 | CG2 | ILE A 506 | -3.391  | -10.863 | -25.343 | 1.00 | 20.30 | C |
| ATOM | 1410 | CD1 | ILE A 506 | -3.788  | -13.538 | -26.835 | 1.00 | 17.71 | C |
| ATOM | 1411 | N   | ARG A 507 | -5.452  | -8.307  | -24.606 | 1.00 | 16.57 | N |
| ATOM | 1412 | CA  | ARG A 507 | -5.186  | -6.881  | -24.448 | 1.00 | 14.02 | C |
| ATOM | 1413 | C   | ARG A 507 | -4.346  | -6.553  | -23.217 | 1.00 | 16.50 | C |
| ATOM | 1414 | O   | ARG A 507 | -4.652  | -6.990  | -22.106 | 1.00 | 15.85 | O |
| ATOM | 1415 | CB  | ARG A 507 | -6.499  | -6.100  | -24.359 | 1.00 | 13.65 | C |
| ATOM | 1416 | CG  | ARG A 507 | -7.431  | -6.266  | -25.543 | 1.00 | 15.27 | C |
| ATOM | 1417 | CD  | ARG A 507 | -8.675  | -5.413  | -25.356 | 1.00 | 13.43 | C |
| ATOM | 1418 | NE  | ARG A 507 | -9.693  | -5.694  | -26.362 | 1.00 | 15.83 | N |
| ATOM | 1419 | CZ  | ARG A 507 | -9.812  | -5.035  | -27.508 | 1.00 | 14.09 | C |
| ATOM | 1420 | NH1 | ARG A 507 | -8.974  | -4.051  | -27.797 | 1.00 | 14.57 | N |
| ATOM | 1421 | NH2 | ARG A 507 | -10.771 | -5.359  | -28.364 | 1.00 | 17.20 | N |
| ATOM | 1422 | N   | SER A 508 | -3.289  | -5.777  | -23.425 | 1.00 | 13.18 | N |
| ATOM | 1423 | CA  | SER A 508 | -2.590  | -5.118  | -22.328 | 1.00 | 15.57 | C |
| ATOM | 1424 | C   | SER A 508 | -2.474  | -3.638  | -22.675 | 1.00 | 13.22 | C |
| ATOM | 1425 | O   | SER A 508 | -2.466  | -3.274  | -23.850 | 1.00 | 15.20 | O |
| ATOM | 1426 | CB  | SER A 508 | -1.208  | -5.733  | -22.087 | 1.00 | 17.24 | C |
| ATOM | 1427 | OG  | SER A 508 | -0.319  | -5.452  | -23.154 | 1.00 | 18.92 | O |
| ATOM | 1428 | N   | GLY A 509 | -2.399  | -2.785  | -21.662 | 1.00 | 13.12 | N |
| ATOM | 1429 | CA  | GLY A 509 | -2.352  | -1.354  | -21.898 | 1.00 | 13.34 | C |
| ATOM | 1430 | C   | GLY A 509 | -3.572  | -0.890  | -22.670 | 1.00 | 14.99 | C |
| ATOM | 1431 | O   | GLY A 509 | -3.477  | -0.060  | -23.574 | 1.00 | 12.28 | O |
| ATOM | 1432 | N   | ALA A 510 | -4.727  | -1.438  | -22.310 | 1.00 | 16.69 | N |

|      |      |     |     |       |         |        |         |      |       |   |
|------|------|-----|-----|-------|---------|--------|---------|------|-------|---|
| ATOM | 1433 | CA  | ALA | A 510 | -5.985  | -1.063 | -22.939 | 1.00 | 13.32 | C |
| ATOM | 1434 | C   | ALA | A 510 | -6.694  | 0.034  | -22.150 | 1.00 | 15.29 | C |
| ATOM | 1435 | O   | ALA | A 510 | -6.321  | 0.342  | -21.015 | 1.00 | 12.00 | O |
| ATOM | 1436 | CB  | ALA | A 510 | -6.887  | -2.279 | -23.074 | 1.00 | 10.89 | C |
| ATOM | 1437 | N   | GLY | A 511 | -7.717  | 0.622  | -22.761 | 1.00 | 10.65 | N |
| ATOM | 1438 | CA  | GLY | A 511 | -8.574  | 1.570  | -22.074 | 1.00 | 10.84 | C |
| ATOM | 1439 | C   | GLY | A 511 | -9.840  | 0.891  | -21.582 | 1.00 | 11.93 | C |
| ATOM | 1440 | O   | GLY | A 511 | -10.645 | 0.408  | -22.378 | 1.00 | 13.89 | O |
| ATOM | 1441 | N   | VAL | A 512 | -10.016 | 0.848  | -20.267 | 1.00 | 10.22 | N |
| ATOM | 1442 | CA  | VAL | A 512 | -11.177 | 0.199  | -19.671 | 1.00 | 11.26 | C |
| ATOM | 1443 | C   | VAL | A 512 | -11.997 | 1.197  | -18.854 | 1.00 | 13.71 | C |
| ATOM | 1444 | O   | VAL | A 512 | -11.450 | 1.953  | -18.052 | 1.00 | 13.64 | O |
| ATOM | 1445 | CB  | VAL | A 512 | -10.754 | -0.985 | -18.775 | 1.00 | 12.36 | C |
| ATOM | 1446 | CG1 | VAL | A 512 | -11.966 | -1.618 | -18.108 | 1.00 | 11.88 | C |
| ATOM | 1447 | CG2 | VAL | A 512 | -9.985  | -2.017 | -19.588 | 1.00 | 10.84 | C |
| ATOM | 1448 | N   | CYS | A 513 | -13.309 | 1.201  | -19.066 | 1.00 | 13.77 | N |
| ATOM | 1449 | CA  | CYS | A 513 | -14.193 | 2.113  | -18.348 | 1.00 | 13.43 | C |
| ATOM | 1450 | C   | CYS | A 513 | -15.626 | 1.607  | -18.338 | 1.00 | 15.75 | C |
| ATOM | 1451 | O   | CYS | A 513 | -15.984 | 0.698  | -19.087 | 1.00 | 17.60 | O |
| ATOM | 1452 | CB  | CYS | A 513 | -14.153 | 3.508  | -18.972 | 1.00 | 18.36 | C |
| ATOM | 1453 | SG  | CYS | A 513 | -14.959 | 3.613  | -20.582 | 1.00 | 17.03 | S |
| ATOM | 1454 | N   | VAL | A 514 | -16.444 | 2.209  | -17.484 | 1.00 | 20.68 | N |
| ATOM | 1455 | CA  | VAL | A 514 | -17.849 | 1.846  | -17.378 | 1.00 | 19.31 | C |
| ATOM | 1456 | C   | VAL | A 514 | -18.735 | 2.920  | -17.998 | 1.00 | 20.25 | C |
| ATOM | 1457 | O   | VAL | A 514 | -18.687 | 4.084  | -17.601 | 1.00 | 18.89 | O |
| ATOM | 1458 | CB  | VAL | A 514 | -18.261 | 1.641  | -15.909 | 1.00 | 20.63 | C |
| ATOM | 1459 | CG1 | VAL | A 514 | -17.794 | 2.815  | -15.059 | 1.00 | 23.12 | C |
| ATOM | 1460 | CG2 | VAL | A 514 | -19.766 | 1.459  | -15.801 | 1.00 | 20.62 | C |
| ATOM | 1461 | N   | LEU | A 515 | -19.538 | 2.526  | -18.981 | 1.00 | 23.52 | N |
| ATOM | 1462 | CA  | LEU | A 515 | -20.495 | 3.440  | -19.596 | 1.00 | 21.52 | C |
| ATOM | 1463 | C   | LEU | A 515 | -21.858 | 2.781  | -19.760 | 1.00 | 23.99 | C |
| ATOM | 1464 | O   | LEU | A 515 | -21.980 | 1.728  | -20.389 | 1.00 | 23.10 | O |
| ATOM | 1465 | CB  | LEU | A 515 | -19.992 | 3.936  | -20.952 | 1.00 | 22.05 | C |
| ATOM | 1466 | CG  | LEU | A 515 | -21.019 | 4.760  | -21.736 | 1.00 | 21.55 | C |
| ATOM | 1467 | CD1 | LEU | A 515 | -21.409 | 6.013  | -20.971 | 1.00 | 13.56 | C |
| ATOM | 1468 | CD2 | LEU | A 515 | -20.497 | 5.111  | -23.121 | 1.00 | 16.88 | C |
| ATOM | 1469 | N   | HIS | A 516 | -22.877 | 3.413  | -19.187 | 1.00 | 21.64 | N |
| ATOM | 1470 | CA  | HIS | A 516 | -24.243 | 2.911  | -19.259 | 1.00 | 19.09 | C |
| ATOM | 1471 | C   | HIS | A 516 | -24.355 | 1.415  | -18.951 | 1.00 | 20.14 | C |
| ATOM | 1472 | O   | HIS | A 516 | -24.903 | 0.642  | -19.736 | 1.00 | 19.59 | O |
| ATOM | 1473 | CB  | HIS | A 516 | -24.870 | 3.254  | -20.611 | 1.00 | 17.03 | C |
| ATOM | 1474 | CG  | HIS | A 516 | -25.156 | 4.714  | -20.785 | 1.00 | 20.17 | C |
| ATOM | 1475 | ND1 | HIS | A 516 | -25.586 | 5.254  | -21.978 | 1.00 | 24.11 | N |
| ATOM | 1476 | CD2 | HIS | A 516 | -25.078 | 5.746  | -19.911 | 1.00 | 22.31 | C |
| ATOM | 1477 | CE1 | HIS | A 516 | -25.758 | 6.557  | -21.832 | 1.00 | 18.25 | C |
| ATOM | 1478 | NE2 | HIS | A 516 | -25.458 | 6.880  | -20.588 | 1.00 | 19.18 | N |

|      |      |     |     |       |         |        |         |      |       |   |
|------|------|-----|-----|-------|---------|--------|---------|------|-------|---|
| ATOM | 1479 | N   | ASN | A 517 | -23.824 | 1.025  | -17.796 | 1.00 | 22.95 | N |
| ATOM | 1480 | CA  | ASN | A 517 | -23.999 | -0.322 | -17.260 | 1.00 | 25.06 | C |
| ATOM | 1481 | C   | ASN | A 517 | -23.261 | -1.404 | -18.039 | 1.00 | 20.97 | C |
| ATOM | 1482 | O   | ASN | A 517 | -23.538 | -2.593 | -17.882 | 1.00 | 21.33 | O |
| ATOM | 1483 | CB  | ASN | A 517 | -25.488 | -0.667 | -17.135 | 1.00 | 29.68 | C |
| ATOM | 1484 | CG  | ASN | A 517 | -25.766 | -1.668 | -16.024 | 1.00 | 27.88 | C |
| ATOM | 1485 | OD1 | ASN | A 517 | -25.853 | -1.302 | -14.851 | 1.00 | 28.88 | O |
| ATOM | 1486 | ND2 | ASN | A 517 | -25.914 | -2.937 | -16.390 | 1.00 | 29.19 | N |
| ATOM | 1487 | N   | CYS | A 518 | -22.320 | -0.988 | -18.877 | 1.00 | 22.77 | N |
| ATOM | 1488 | CA  | CYS | A 518 | -21.455 | -1.929 | -19.575 | 1.00 | 20.18 | C |
| ATOM | 1489 | C   | CYS | A 518 | -19.997 | -1.597 | -19.305 | 1.00 | 22.16 | C |
| ATOM | 1490 | O   | CYS | A 518 | -19.655 | -0.450 | -19.012 | 1.00 | 22.33 | O |
| ATOM | 1491 | CB  | CYS | A 518 | -21.729 | -1.910 | -21.077 | 1.00 | 21.90 | C |
| ATOM | 1492 | SG  | CYS | A 518 | -23.374 | -2.483 | -21.532 | 1.00 | 24.97 | S |
| ATOM | 1493 | N   | ILE | A 519 | -19.139 | -2.606 | -19.399 | 1.00 | 22.35 | N |
| ATOM | 1494 | CA  | ILE | A 519 | -17.712 | -2.406 | -19.201 | 1.00 | 17.50 | C |
| ATOM | 1495 | C   | ILE | A 519 | -16.988 | -2.440 | -20.536 | 1.00 | 18.53 | C |
| ATOM | 1496 | O   | ILE | A 519 | -16.888 | -3.486 | -21.175 | 1.00 | 18.43 | O |
| ATOM | 1497 | CB  | ILE | A 519 | -17.115 | -3.467 | -18.268 | 1.00 | 19.24 | C |
| ATOM | 1498 | CG1 | ILE | A 519 | -17.836 | -3.450 | -16.918 | 1.00 | 16.84 | C |
| ATOM | 1499 | CG2 | ILE | A 519 | -15.623 | -3.229 | -18.090 | 1.00 | 14.07 | C |
| ATOM | 1500 | CD1 | ILE | A 519 | -17.267 | -4.422 | -15.915 | 1.00 | 18.92 | C |
| ATOM | 1501 | N   | TYR | A 520 | -16.486 | -1.284 | -20.952 | 1.00 | 19.80 | N |
| ATOM | 1502 | CA  | TYR | A 520 | -15.816 | -1.159 | -22.237 | 1.00 | 19.18 | C |
| ATOM | 1503 | C   | TYR | A 520 | -14.321 | -1.447 | -22.147 | 1.00 | 18.59 | C |
| ATOM | 1504 | O   | TYR | A 520 | -13.670 | -1.133 | -21.149 | 1.00 | 17.79 | O |
| ATOM | 1505 | CB  | TYR | A 520 | -16.047 | 0.237  | -22.822 | 1.00 | 17.92 | C |
| ATOM | 1506 | CG  | TYR | A 520 | -17.447 | 0.459  | -23.347 | 1.00 | 21.14 | C |
| ATOM | 1507 | CD1 | TYR | A 520 | -18.499 | 0.742  | -22.485 | 1.00 | 19.20 | C |
| ATOM | 1508 | CD2 | TYR | A 520 | -17.717 | 0.390  | -24.708 | 1.00 | 15.95 | C |
| ATOM | 1509 | CE1 | TYR | A 520 | -19.780 | 0.946  | -22.963 | 1.00 | 19.94 | C |
| ATOM | 1510 | CE2 | TYR | A 520 | -18.994 | 0.592  | -25.195 | 1.00 | 16.50 | C |
| ATOM | 1511 | CZ  | TYR | A 520 | -20.021 | 0.870  | -24.320 | 1.00 | 19.39 | C |
| ATOM | 1512 | OH  | TYR | A 520 | -21.294 | 1.073  | -24.804 | 1.00 | 18.56 | O |
| ATOM | 1513 | N   | ALA | A 521 | -13.792 | -2.054 | -23.202 | 1.00 | 14.55 | N |
| ATOM | 1514 | CA  | ALA | A 521 | -12.361 | -2.269 | -23.339 | 1.00 | 13.23 | C |
| ATOM | 1515 | C   | ALA | A 521 | -11.938 | -1.815 | -24.731 | 1.00 | 17.61 | C |
| ATOM | 1516 | O   | ALA | A 521 | -12.312 | -2.425 | -25.734 | 1.00 | 16.66 | O |
| ATOM | 1517 | CB  | ALA | A 521 | -12.021 | -3.727 | -23.127 | 1.00 | 13.69 | C |
| ATOM | 1518 | N   | ALA | A 522 | -11.170 | -0.732 | -24.788 | 1.00 | 13.77 | N |
| ATOM | 1519 | CA  | ALA | A 522 | -10.795 | -0.132 | -26.060 | 1.00 | 11.38 | C |
| ATOM | 1520 | C   | ALA | A 522 | -9.294  | -0.180 | -26.285 | 1.00 | 10.41 | C |
| ATOM | 1521 | O   | ALA | A 522 | -8.511  | 0.096  | -25.378 | 1.00 | 11.00 | O |
| ATOM | 1522 | CB  | ALA | A 522 | -11.293 | 1.301  | -26.134 | 1.00 | 11.19 | C |
| ATOM | 1523 | N   | GLY | A 523 | -8.907  | -0.533 | -27.505 | 1.00 | 11.32 | N |
| ATOM | 1524 | CA  | GLY | A 523 | -7.512  | -0.553 | -27.896 | 1.00 | 11.78 | C |



|      |      |     |           |        |         |         |      |       |   |
|------|------|-----|-----------|--------|---------|---------|------|-------|---|
| ATOM | 1525 | C   | GLY A 523 | -6.666 | -1.508  | -27.079 | 1.00 | 13.75 | C |
| ATOM | 1526 | O   | GLY A 523 | -7.158 | -2.500  | -26.540 | 1.00 | 12.11 | O |
| ATOM | 1527 | N   | GLY A 524 | -5.380 | -1.197  | -26.988 | 1.00 | 12.66 | N |
| ATOM | 1528 | CA  | GLY A 524 | -4.447 | -2.031  | -26.262 | 1.00 | 15.02 | C |
| ATOM | 1529 | C   | GLY A 524 | -3.434 | -2.677  | -27.183 | 1.00 | 13.65 | C |
| ATOM | 1530 | O   | GLY A 524 | -3.262 | -2.267  | -28.334 | 1.00 | 14.66 | O |
| ATOM | 1531 | N   | TYR A 525 | -2.767 | -3.701  | -26.668 | 1.00 | 10.64 | N |
| ATOM | 1532 | CA  | TYR A 525 | -1.714 | -4.388  | -27.397 | 1.00 | 13.67 | C |
| ATOM | 1533 | C   | TYR A 525 | -1.914 | -5.888  | -27.246 | 1.00 | 16.69 | C |
| ATOM | 1534 | O   | TYR A 525 | -1.915 | -6.411  | -26.132 | 1.00 | 17.69 | O |
| ATOM | 1535 | CB  | TYR A 525 | -0.356 | -3.967  | -26.841 | 1.00 | 17.07 | C |
| ATOM | 1536 | CG  | TYR A 525 | 0.833  | -4.623  | -27.497 | 1.00 | 18.76 | C |
| ATOM | 1537 | CD1 | TYR A 525 | 1.262  | -4.224  | -28.754 | 1.00 | 21.88 | C |
| ATOM | 1538 | CD2 | TYR A 525 | 1.544  | -5.622  | -26.846 | 1.00 | 21.24 | C |
| ATOM | 1539 | CE1 | TYR A 525 | 2.357  | -4.813  | -29.354 | 1.00 | 21.89 | C |
| ATOM | 1540 | CE2 | TYR A 525 | 2.640  | -6.217  | -27.437 | 1.00 | 23.89 | C |
| ATOM | 1541 | CZ  | TYR A 525 | 3.042  | -5.807  | -28.691 | 1.00 | 22.95 | C |
| ATOM | 1542 | OH  | TYR A 525 | 4.134  | -6.395  | -29.285 | 1.00 | 31.30 | O |
| ATOM | 1543 | N   | ASP A 526 | -2.096 | -6.577  | -28.367 | 1.00 | 15.23 | N |
| ATOM | 1544 | CA  | ASP A 526 | -2.409 | -8.002  | -28.339 | 1.00 | 17.51 | C |
| ATOM | 1545 | C   | ASP A 526 | -1.150 | -8.860  | -28.326 | 1.00 | 18.18 | C |
| ATOM | 1546 | O   | ASP A 526 | -1.224 | -10.086 | -28.385 | 1.00 | 22.54 | O |
| ATOM | 1547 | CB  | ASP A 526 | -3.299 | -8.382  | -29.527 | 1.00 | 17.68 | C |
| ATOM | 1548 | CG  | ASP A 526 | -2.583 | -8.259  | -30.859 | 1.00 | 17.04 | C |
| ATOM | 1549 | OD1 | ASP A 526 | -1.470 | -7.695  | -30.892 | 1.00 | 20.13 | O |
| ATOM | 1550 | OD2 | ASP A 526 | -3.140 | -8.723  | -31.876 | 1.00 | 23.92 | O |
| ATOM | 1551 | N   | GLY A 527 | 0.004  | -8.210  | -28.245 | 1.00 | 21.05 | N |
| ATOM | 1552 | CA  | GLY A 527 | 1.270  | -8.918  | -28.235 | 1.00 | 19.53 | C |
| ATOM | 1553 | C   | GLY A 527 | 2.027  | -8.756  | -29.537 | 1.00 | 23.59 | C |
| ATOM | 1554 | O   | GLY A 527 | 3.232  | -8.997  | -29.598 | 1.00 | 26.74 | O |
| ATOM | 1555 | N   | GLN A 528 | 1.321  | -8.340  | -30.584 | 1.00 | 22.43 | N |
| ATOM | 1556 | CA  | GLN A 528 | 1.939  | -8.183  | -31.893 | 1.00 | 22.08 | C |
| ATOM | 1557 | C   | GLN A 528 | 1.610  | -6.837  | -32.528 | 1.00 | 23.46 | C |
| ATOM | 1558 | O   | GLN A 528 | 2.438  | -6.260  | -33.229 | 1.00 | 29.95 | O |
| ATOM | 1559 | CB  | GLN A 528 | 1.524  | -9.324  | -32.823 | 1.00 | 29.57 | C |
| ATOM | 1560 | CG  | GLN A 528 | 2.154  | -9.254  | -34.203 | 1.00 | 31.69 | C |
| ATOM | 1561 | CD  | GLN A 528 | 1.961  | -10.531 | -34.998 | 1.00 | 34.79 | C |
| ATOM | 1562 | OE1 | GLN A 528 | 1.739  | -11.603 | -34.432 | 1.00 | 21.65 | O |
| ATOM | 1563 | NE2 | GLN A 528 | 2.040  | -10.421 | -36.320 | 1.00 | 43.72 | N |
| ATOM | 1564 | N   | ASP A 529 | 0.401  | -6.340  | -32.286 | 1.00 | 24.07 | N |
| ATOM | 1565 | CA  | ASP A 529 | -0.008 | -5.053  | -32.838 | 1.00 | 24.17 | C |
| ATOM | 1566 | C   | ASP A 529 | -0.768 | -4.218  | -31.819 | 1.00 | 17.45 | C |
| ATOM | 1567 | O   | ASP A 529 | -1.371 | -4.753  | -30.890 | 1.00 | 17.04 | O |
| ATOM | 1568 | CB  | ASP A 529 | -0.897 | -5.247  | -34.071 | 1.00 | 25.26 | C |
| ATOM | 1569 | CG  | ASP A 529 | -0.359 | -6.292  | -35.025 | 1.00 | 32.68 | C |
| ATOM | 1570 | OD1 | ASP A 529 | 0.633  | -6.007  | -35.727 | 1.00 | 31.69 | O |

|      |      |     |     |   |     |         |        |         |      |       |   |
|------|------|-----|-----|---|-----|---------|--------|---------|------|-------|---|
| ATOM | 1571 | OD2 | ASP | A | 529 | -0.940  | -7.397 | -35.080 | 1.00 | 38.14 | O |
| ATOM | 1572 | N   | GLN | A | 530 | -0.738  | -2.902 | -32.001 | 1.00 | 17.31 | N |
| ATOM | 1573 | CA  | GLN | A | 530 | -1.643  | -2.023 | -31.274 | 1.00 | 19.37 | C |
| ATOM | 1574 | C   | GLN | A | 530 | -3.035  | -2.186 | -31.861 | 1.00 | 14.07 | C |
| ATOM | 1575 | O   | GLN | A | 530 | -3.183  | -2.455 | -33.053 | 1.00 | 14.72 | O |
| ATOM | 1576 | CB  | GLN | A | 530 | -1.196  | -0.564 | -31.362 | 1.00 | 19.19 | C |
| ATOM | 1577 | CG  | GLN | A | 530 | -0.276  | -0.128 | -30.235 | 1.00 | 18.59 | C |
| ATOM | 1578 | CD  | GLN | A | 530 | 1.134   | -0.646 | -30.399 | 1.00 | 21.05 | C |
| ATOM | 1579 | OE1 | GLN | A | 530 | 1.493   | -1.186 | -31.446 | 1.00 | 19.80 | O |
| ATOM | 1580 | NE2 | GLN | A | 530 | 1.947   | -0.481 | -29.364 | 1.00 | 26.66 | N |
| ATOM | 1581 | N   | LEU | A | 531 | -4.053  | -2.023 | -31.023 | 1.00 | 15.07 | N |
| ATOM | 1582 | CA  | LEU | A | 531 | -5.419  | -2.350 | -31.412 | 1.00 | 14.25 | C |
| ATOM | 1583 | C   | LEU | A | 531 | -6.316  | -1.127 | -31.550 | 1.00 | 12.10 | C |
| ATOM | 1584 | O   | LEU | A | 531 | -6.126  | -0.123 | -30.865 | 1.00 | 10.43 | O |
| ATOM | 1585 | CB  | LEU | A | 531 | -6.031  | -3.309 | -30.390 | 1.00 | 13.98 | C |
| ATOM | 1586 | CG  | LEU | A | 531 | -5.246  | -4.591 | -30.111 | 1.00 | 14.66 | C |
| ATOM | 1587 | CD1 | LEU | A | 531 | -5.852  | -5.333 | -28.931 | 1.00 | 15.59 | C |
| ATOM | 1588 | CD2 | LEU | A | 531 | -5.209  | -5.480 | -31.344 | 1.00 | 12.99 | C |
| ATOM | 1589 | N   | ASN | A | 532 | -7.296  | -1.224 | -32.442 | 1.00 | 12.74 | N |
| ATOM | 1590 | CA  | ASN | A | 532 | -8.343  | -0.216 | -32.545 | 1.00 | 11.68 | C |
| ATOM | 1591 | C   | ASN | A | 532 | -9.708  | -0.833 | -32.273 | 1.00 | 12.04 | C |
| ATOM | 1592 | O   | ASN | A | 532 | -10.711 | -0.130 | -32.171 | 1.00 | 15.75 | O |
| ATOM | 1593 | CB  | ASN | A | 532 | -8.324  | 0.479  | -33.911 | 1.00 | 11.98 | C |
| ATOM | 1594 | CG  | ASN | A | 532 | -8.581  | -0.476 | -35.067 | 1.00 | 13.09 | C |
| ATOM | 1595 | OD1 | ASN | A | 532 | -8.946  | -1.634 | -34.870 | 1.00 | 10.04 | O |
| ATOM | 1596 | ND2 | ASN | A | 532 | -8.395  | 0.015  | -36.285 | 1.00 | 18.60 | N |
| ATOM | 1597 | N   | SER | A | 533 | -9.736  | -2.156 | -32.156 | 1.00 | 12.56 | N |
| ATOM | 1598 | CA  | SER | A | 533 | -10.974 | -2.866 | -31.869 | 1.00 | 16.45 | C |
| ATOM | 1599 | C   | SER | A | 533 | -11.460 | -2.504 | -30.474 | 1.00 | 18.11 | C |
| ATOM | 1600 | O   | SER | A | 533 | -10.664 | -2.167 | -29.597 | 1.00 | 15.07 | O |
| ATOM | 1601 | CB  | SER | A | 533 | -10.784 | -4.382 | -31.990 | 1.00 | 14.86 | C |
| ATOM | 1602 | OG  | SER | A | 533 | -10.068 | -4.907 | -30.886 | 1.00 | 15.05 | O |
| ATOM | 1603 | N   | VAL | A | 534 | -12.772 | -2.571 | -30.280 | 1.00 | 17.04 | N |
| ATOM | 1604 | CA  | VAL | A | 534 | -13.382 | -2.204 | -29.012 | 1.00 | 14.19 | C |
| ATOM | 1605 | C   | VAL | A | 534 | -14.517 | -3.162 | -28.683 | 1.00 | 17.34 | C |
| ATOM | 1606 | O   | VAL | A | 534 | -15.361 | -3.451 | -29.531 | 1.00 | 16.11 | O |
| ATOM | 1607 | CB  | VAL | A | 534 | -13.941 | -0.767 | -29.054 | 1.00 | 16.60 | C |
| ATOM | 1608 | CG1 | VAL | A | 534 | -14.582 | -0.403 | -27.723 | 1.00 | 15.11 | C |
| ATOM | 1609 | CG2 | VAL | A | 534 | -12.841 | 0.222  | -29.413 | 1.00 | 14.70 | C |
| ATOM | 1610 | N   | GLU | A | 535 | -14.529 | -3.660 | -27.452 | 1.00 | 19.83 | N |
| ATOM | 1611 | CA  | GLU | A | 535 | -15.593 | -4.549 | -27.003 | 1.00 | 16.75 | C |
| ATOM | 1612 | C   | GLU | A | 535 | -16.055 | -4.185 | -25.596 | 1.00 | 16.74 | C |
| ATOM | 1613 | O   | GLU | A | 535 | -15.297 | -3.622 | -24.806 | 1.00 | 17.94 | O |
| ATOM | 1614 | CB  | GLU | A | 535 | -15.149 | -6.016 | -27.070 | 1.00 | 18.72 | C |
| ATOM | 1615 | CG  | GLU | A | 535 | -13.864 | -6.332 | -26.317 | 1.00 | 17.55 | C |
| ATOM | 1616 | CD  | GLU | A | 535 | -13.384 | -7.758 | -26.549 | 1.00 | 19.70 | C |

|      |      |     |     |   |     |         |         |         |      |       |   |
|------|------|-----|-----|---|-----|---------|---------|---------|------|-------|---|
| ATOM | 1617 | OE1 | GLU | A | 535 | -14.197 | -8.696  | -26.402 | 1.00 | 22.33 | O |
| ATOM | 1618 | OE2 | GLU | A | 535 | -12.195 | -7.944  | -26.884 | 1.00 | 16.17 | O |
| ATOM | 1619 | N   | ARG | A | 536 | -17.308 | -4.500  | -25.294 | 1.00 | 18.68 | N |
| ATOM | 1620 | CA  | ARG | A | 536 | -17.862 | -4.231  | -23.976 | 1.00 | 20.10 | C |
| ATOM | 1621 | C   | ARG | A | 536 | -18.307 | -5.530  | -23.317 | 1.00 | 20.83 | C |
| ATOM | 1622 | O   | ARG | A | 536 | -18.432 | -6.563  | -23.976 | 1.00 | 18.65 | O |
| ATOM | 1623 | CB  | ARG | A | 536 | -19.040 | -3.266  | -24.083 | 1.00 | 19.66 | C |
| ATOM | 1624 | CG  | ARG | A | 536 | -20.120 | -3.746  | -25.027 | 1.00 | 24.11 | C |
| ATOM | 1625 | CD  | ARG | A | 536 | -21.297 | -2.793  | -25.078 | 1.00 | 20.71 | C |
| ATOM | 1626 | NE  | ARG | A | 536 | -22.284 | -3.238  | -26.056 | 1.00 | 23.26 | N |
| ATOM | 1627 | CZ  | ARG | A | 536 | -23.460 | -2.654  | -26.252 | 1.00 | 20.47 | C |
| ATOM | 1628 | NH1 | ARG | A | 536 | -23.804 | -1.596  | -25.532 | 1.00 | 28.75 | N |
| ATOM | 1629 | NH2 | ARG | A | 536 | -24.292 | -3.130  | -27.167 | 1.00 | 28.75 | N |
| ATOM | 1630 | N   | TYR | A | 537 | -18.541 | -5.472  | -22.012 | 1.00 | 22.35 | N |
| ATOM | 1631 | CA  | TYR | A | 537 | -18.969 | -6.640  | -21.257 | 1.00 | 21.68 | C |
| ATOM | 1632 | C   | TYR | A | 537 | -20.328 | -6.391  | -20.617 | 1.00 | 19.56 | C |
| ATOM | 1633 | O   | TYR | A | 537 | -20.577 | -5.318  | -20.070 | 1.00 | 21.12 | O |
| ATOM | 1634 | CB  | TYR | A | 537 | -17.931 | -6.987  | -20.189 | 1.00 | 20.53 | C |
| ATOM | 1635 | CG  | TYR | A | 537 | -18.317 | -8.145  | -19.295 | 1.00 | 22.58 | C |
| ATOM | 1636 | CD1 | TYR | A | 537 | -18.167 | -9.458  | -19.721 | 1.00 | 19.77 | C |
| ATOM | 1637 | CD2 | TYR | A | 537 | -18.819 | -7.923  | -18.019 | 1.00 | 23.16 | C |
| ATOM | 1638 | CE1 | TYR | A | 537 | -18.513 | -10.519 | -18.904 | 1.00 | 24.27 | C |
| ATOM | 1639 | CE2 | TYR | A | 537 | -19.167 | -8.977  | -17.192 | 1.00 | 25.29 | C |
| ATOM | 1640 | CZ  | TYR | A | 537 | -19.013 | -10.273 | -17.638 | 1.00 | 28.78 | C |
| ATOM | 1641 | OH  | TYR | A | 537 | -19.360 | -11.323 | -16.817 | 1.00 | 22.40 | O |
| ATOM | 1642 | N   | ASP | A | 538 | -21.209 | -7.382  | -20.697 | 1.00 | 24.67 | N |
| ATOM | 1643 | CA  | ASP | A | 538 | -22.530 | -7.277  | -20.087 | 1.00 | 28.45 | C |
| ATOM | 1644 | C   | ASP | A | 538 | -22.686 | -8.295  | -18.962 | 1.00 | 26.33 | C |
| ATOM | 1645 | O   | ASP | A | 538 | -22.589 | -9.500  | -19.188 | 1.00 | 25.77 | O |
| ATOM | 1646 | CB  | ASP | A | 538 | -23.625 | -7.479  | -21.136 | 1.00 | 27.80 | C |
| ATOM | 1647 | CG  | ASP | A | 538 | -25.017 | -7.344  | -20.555 | 1.00 | 26.42 | C |
| ATOM | 1648 | OD1 | ASP | A | 538 | -25.878 | -8.189  | -20.871 | 1.00 | 30.99 | O |
| ATOM | 1649 | OD2 | ASP | A | 538 | -25.250 | -6.392  | -19.782 | 1.00 | 30.52 | O |
| ATOM | 1650 | N   | VAL | A | 539 | -22.926 | -7.804  | -17.750 | 1.00 | 25.97 | N |
| ATOM | 1651 | CA  | VAL | A | 539 | -23.065 | -8.673  | -16.586 | 1.00 | 28.97 | C |
| ATOM | 1652 | C   | VAL | A | 539 | -24.261 | -9.612  | -16.726 | 1.00 | 31.87 | C |
| ATOM | 1653 | O   | VAL | A | 539 | -24.228 | -10.750 | -16.258 | 1.00 | 33.15 | O |
| ATOM | 1654 | CB  | VAL | A | 539 | -23.217 | -7.861  | -15.282 | 1.00 | 34.68 | C |
| ATOM | 1655 | CG1 | VAL | A | 539 | -22.080 | -6.856  | -15.143 | 1.00 | 26.06 | C |
| ATOM | 1656 | CG2 | VAL | A | 539 | -24.568 | -7.158  | -15.248 | 1.00 | 32.04 | C |
| ATOM | 1657 | N   | GLU | A | 540 | -25.315 | -9.126  | -17.373 | 1.00 | 30.58 | N |
| ATOM | 1658 | CA  | GLU | A | 540 | -26.531 | -9.907  | -17.563 | 1.00 | 33.31 | C |
| ATOM | 1659 | C   | GLU | A | 540 | -26.283 | -11.164 | -18.393 | 1.00 | 30.34 | C |
| ATOM | 1660 | O   | GLU | A | 540 | -26.558 | -12.277 | -17.946 | 1.00 | 30.30 | O |
| ATOM | 1661 | CB  | GLU | A | 540 | -27.615 | -9.048  | -18.214 | 1.00 | 34.62 | C |
| ATOM | 1662 | CG  | GLU | A | 540 | -28.027 | -7.847  | -17.379 | 1.00 | 41.48 | C |

|      |      |     |     |   |     |         |         |         |      |       |   |
|------|------|-----|-----|---|-----|---------|---------|---------|------|-------|---|
| ATOM | 1663 | CD  | GLU | A | 540 | -28.964 | -6.914  | -18.119 | 1.00 | 54.46 | C |
| ATOM | 1664 | OE1 | GLU | A | 540 | -29.197 | -7.139  | -19.325 | 1.00 | 60.38 | O |
| ATOM | 1665 | OE2 | GLU | A | 540 | -29.466 | -5.955  | -17.495 | 1.00 | 56.76 | O |
| ATOM | 1666 | N   | THR | A | 541 | -25.763 | -10.982 | -19.602 | 1.00 | 34.25 | N |
| ATOM | 1667 | CA  | THR | A | 541 | -25.489 | -12.106 | -20.491 | 1.00 | 27.69 | C |
| ATOM | 1668 | C   | THR | A | 541 | -24.127 | -12.733 | -20.221 | 1.00 | 25.04 | C |
| ATOM | 1669 | O   | THR | A | 541 | -23.871 | -13.867 | -20.622 | 1.00 | 23.88 | O |
| ATOM | 1670 | CB  | THR | A | 541 | -25.564 | -11.691 | -21.973 | 1.00 | 28.47 | C |
| ATOM | 1671 | OG1 | THR | A | 541 | -24.747 | -10.534 | -22.189 | 1.00 | 29.22 | O |
| ATOM | 1672 | CG2 | THR | A | 541 | -27.001 | -11.376 | -22.364 | 1.00 | 23.99 | C |
| ATOM | 1673 | N   | GLU | A | 542 | -23.255 | -11.995 | -19.541 | 1.00 | 30.92 | N |
| ATOM | 1674 | CA  | GLU | A | 542 | -21.918 | -12.492 | -19.236 | 1.00 | 26.25 | C |
| ATOM | 1675 | C   | GLU | A | 542 | -21.099 | -12.671 | -20.509 | 1.00 | 24.34 | C |
| ATOM | 1676 | O   | GLU | A | 542 | -20.323 | -13.619 | -20.626 | 1.00 | 26.61 | O |
| ATOM | 1677 | CB  | GLU | A | 542 | -22.002 | -13.824 | -18.491 | 1.00 | 30.12 | C |
| ATOM | 1678 | CG  | GLU | A | 542 | -21.644 | -13.751 | -17.017 | 1.00 | 34.59 | C |
| ATOM | 1679 | CD  | GLU | A | 542 | -21.734 | -15.102 | -16.329 | 1.00 | 36.97 | C |
| ATOM | 1680 | OE1 | GLU | A | 542 | -22.206 | -16.066 | -16.967 | 1.00 | 38.80 | O |
| ATOM | 1681 | OE2 | GLU | A | 542 | -21.332 | -15.200 | -15.151 | 1.00 | 44.81 | O |
| ATOM | 1682 | N   | THR | A | 543 | -21.275 | -11.761 | -21.461 | 1.00 | 22.19 | N |
| ATOM | 1683 | CA  | THR | A | 543 | -20.582 | -11.859 | -22.740 | 1.00 | 26.21 | C |
| ATOM | 1684 | C   | THR | A | 543 | -19.828 | -10.585 | -23.100 | 1.00 | 24.65 | C |
| ATOM | 1685 | O   | THR | A | 543 | -20.242 | -9.481  | -22.749 | 1.00 | 22.03 | O |
| ATOM | 1686 | CB  | THR | A | 543 | -21.558 | -12.185 | -23.891 | 1.00 | 24.28 | C |
| ATOM | 1687 | OG1 | THR | A | 543 | -22.662 | -11.271 | -23.857 | 1.00 | 29.40 | O |
| ATOM | 1688 | CG2 | THR | A | 543 | -22.079 | -13.608 | -23.769 | 1.00 | 22.13 | C |
| ATOM | 1689 | N   | TRP | A | 544 | -18.711 | -10.756 | -23.800 | 1.00 | 23.11 | N |
| ATOM | 1690 | CA  | TRP | A | 544 | -18.010 | -9.642  | -24.419 | 1.00 | 19.26 | C |
| ATOM | 1691 | C   | TRP | A | 544 | -18.419 | -9.567  | -25.884 | 1.00 | 19.59 | C |
| ATOM | 1692 | O   | TRP | A | 544 | -18.226 | -10.521 | -26.636 | 1.00 | 20.00 | O |
| ATOM | 1693 | CB  | TRP | A | 544 | -16.495 | -9.825  | -24.316 | 1.00 | 18.66 | C |
| ATOM | 1694 | CG  | TRP | A | 544 | -15.940 | -9.621  | -22.940 | 1.00 | 20.67 | C |
| ATOM | 1695 | CD1 | TRP | A | 544 | -15.810 | -10.561 | -21.959 | 1.00 | 20.35 | C |
| ATOM | 1696 | CD2 | TRP | A | 544 | -15.425 | -8.400  | -22.397 | 1.00 | 17.08 | C |
| ATOM | 1697 | NE1 | TRP | A | 544 | -15.251 | -9.999  | -20.836 | 1.00 | 19.86 | N |
| ATOM | 1698 | CE2 | TRP | A | 544 | -15.006 | -8.673  | -21.078 | 1.00 | 18.02 | C |
| ATOM | 1699 | CE3 | TRP | A | 544 | -15.279 | -7.102  | -22.896 | 1.00 | 18.20 | C |
| ATOM | 1700 | CZ2 | TRP | A | 544 | -14.452 | -7.697  | -20.252 | 1.00 | 17.76 | C |
| ATOM | 1701 | CZ3 | TRP | A | 544 | -14.729 | -6.132  | -22.074 | 1.00 | 17.30 | C |
| ATOM | 1702 | CH2 | TRP | A | 544 | -14.323 | -6.435  | -20.767 | 1.00 | 17.88 | C |
| ATOM | 1703 | N   | THR | A | 545 | -18.993 | -8.437  | -26.283 | 1.00 | 20.90 | N |
| ATOM | 1704 | CA  | THR | A | 545 | -19.372 | -8.225  | -27.674 | 1.00 | 20.92 | C |
| ATOM | 1705 | C   | THR | A | 545 | -18.657 | -7.008  | -28.249 | 1.00 | 20.75 | C |
| ATOM | 1706 | O   | THR | A | 545 | -18.436 | -6.020  | -27.550 | 1.00 | 21.72 | O |
| ATOM | 1707 | CB  | THR | A | 545 | -20.896 | -8.043  | -27.831 | 1.00 | 21.60 | C |
| ATOM | 1708 | OG1 | THR | A | 545 | -21.341 | -6.962  | -27.002 | 1.00 | 17.11 | O |

|      |      |               |         |        |         |      |       |   |
|------|------|---------------|---------|--------|---------|------|-------|---|
| ATOM | 1709 | CG2 THR A 545 | -21.628 | -9.315 | -27.431 | 1.00 | 21.36 | C |
| ATOM | 1710 | N PHE A 546   | -18.293 | -7.088 | -29.525 | 1.00 | 18.96 | N |
| ATOM | 1711 | CA PHE A 546  | -17.612 | -5.985 | -30.194 | 1.00 | 16.52 | C |
| ATOM | 1712 | C PHE A 546   | -18.553 | -4.821 | -30.481 | 1.00 | 17.90 | C |
| ATOM | 1713 | O PHE A 546   | -19.764 | -5.000 | -30.620 | 1.00 | 16.12 | O |
| ATOM | 1714 | CB PHE A 546  | -16.970 | -6.453 | -31.504 | 1.00 | 14.43 | C |
| ATOM | 1715 | CG PHE A 546  | -15.680 | -7.197 | -31.317 | 1.00 | 16.17 | C |
| ATOM | 1716 | CD1 PHE A 546 | -14.515 | -6.519 | -31.004 | 1.00 | 13.53 | C |
| ATOM | 1717 | CD2 PHE A 546 | -15.631 | -8.574 | -31.463 | 1.00 | 15.72 | C |
| ATOM | 1718 | CE1 PHE A 546 | -13.324 | -7.199 | -30.832 | 1.00 | 14.81 | C |
| ATOM | 1719 | CE2 PHE A 546 | -14.442 | -9.260 | -31.293 | 1.00 | 16.08 | C |
| ATOM | 1720 | CZ PHE A 546  | -13.287 | -8.572 | -30.977 | 1.00 | 14.15 | C |
| ATOM | 1721 | N VAL A 547   | -17.978 | -3.626 | -30.562 | 1.00 | 14.47 | N |
| ATOM | 1722 | CA VAL A 547  | -18.700 | -2.445 | -31.008 | 1.00 | 16.22 | C |
| ATOM | 1723 | C VAL A 547   | -17.904 | -1.809 | -32.140 | 1.00 | 13.94 | C |
| ATOM | 1724 | O VAL A 547   | -16.996 | -2.434 | -32.688 | 1.00 | 22.65 | O |
| ATOM | 1725 | CB VAL A 547  | -18.904 | -1.425 | -29.865 | 1.00 | 17.73 | C |
| ATOM | 1726 | CG1 VAL A 547 | -19.760 | -2.027 | -28.759 | 1.00 | 14.02 | C |
| ATOM | 1727 | CG2 VAL A 547 | -17.563 | -0.951 | -29.319 | 1.00 | 12.52 | C |
| ATOM | 1728 | N ALA A 548   | -18.240 | -0.574 | -32.494 | 1.00 | 12.42 | N |
| ATOM | 1729 | CA ALA A 548  | -17.500 | 0.142  | -33.527 | 1.00 | 15.03 | C |
| ATOM | 1730 | C ALA A 548   | -16.054 | 0.364  | -33.091 | 1.00 | 14.68 | C |
| ATOM | 1731 | O ALA A 548   | -15.800 | 0.782  | -31.963 | 1.00 | 18.28 | O |
| ATOM | 1732 | CB ALA A 548  | -18.174 | 1.469  | -33.839 | 1.00 | 13.89 | C |
| ATOM | 1733 | N PRO A 549   | -15.096 | 0.077  | -33.984 | 1.00 | 17.78 | N |
| ATOM | 1734 | CA PRO A 549  | -13.674 | 0.253  | -33.674 | 1.00 | 15.00 | C |
| ATOM | 1735 | C PRO A 549   | -13.253 | 1.719  | -33.709 | 1.00 | 17.11 | C |
| ATOM | 1736 | O PRO A 549   | -13.882 | 2.530  | -34.394 | 1.00 | 16.70 | O |
| ATOM | 1737 | CB PRO A 549  | -12.981 | -0.515 | -34.799 | 1.00 | 16.39 | C |
| ATOM | 1738 | CG PRO A 549  | -13.924 | -0.407 | -35.946 | 1.00 | 15.84 | C |
| ATOM | 1739 | CD PRO A 549  | -15.304 | -0.451 | -35.344 | 1.00 | 18.11 | C |
| ATOM | 1740 | N MET A 550   | -12.198 | 2.050  | -32.970 | 1.00 | 18.14 | N |
| ATOM | 1741 | CA MET A 550  | -11.671 | 3.410  | -32.948 | 1.00 | 14.62 | C |
| ATOM | 1742 | C MET A 550   | -11.060 | 3.776  | -34.290 | 1.00 | 14.97 | C |
| ATOM | 1743 | O MET A 550   | -10.747 | 2.902  | -35.097 | 1.00 | 14.34 | O |
| ATOM | 1744 | CB MET A 550  | -10.620 | 3.563  | -31.849 | 1.00 | 14.83 | C |
| ATOM | 1745 | CG MET A 550  | -11.188 | 3.627  | -30.446 | 1.00 | 14.35 | C |
| ATOM | 1746 | SD MET A 550  | -9.888  | 3.737  | -29.209 | 1.00 | 9.00  | S |
| ATOM | 1747 | CE MET A 550  | -9.027  | 2.194  | -29.501 | 1.00 | 12.45 | C |
| ATOM | 1748 | N LYS A 551   | -10.889 | 5.073  | -34.523 | 1.00 | 18.45 | N |
| ATOM | 1749 | CA LYS A 551  | -10.299 | 5.555  | -35.764 | 1.00 | 15.05 | C |
| ATOM | 1750 | C LYS A 551   | -8.813  | 5.220  | -35.829 | 1.00 | 16.06 | C |
| ATOM | 1751 | O LYS A 551   | -8.259  | 5.023  | -36.908 | 1.00 | 15.07 | O |
| ATOM | 1752 | CB LYS A 551  | -10.512 | 7.064  | -35.909 | 1.00 | 18.77 | C |
| ATOM | 1753 | CG LYS A 551  | -11.958 | 7.455  | -36.159 | 1.00 | 20.83 | C |
| ATOM | 1754 | CD LYS A 551  | -12.490 | 6.752  | -37.398 | 1.00 | 28.15 | C |

|      |      |     |     |   |     |         |        |         |      |       |   |
|------|------|-----|-----|---|-----|---------|--------|---------|------|-------|---|
| ATOM | 1755 | CE  | LYS | A | 551 | -14.001 | 6.820  | -37.479 | 1.00 | 24.98 | C |
| ATOM | 1756 | NZ  | LYS | A | 551 | -14.518 | 5.963  | -38.581 | 1.00 | 33.53 | N |
| ATOM | 1757 | N   | HIS | A | 552 | -8.173  | 5.152  | -34.667 | 1.00 | 16.71 | N |
| ATOM | 1758 | CA  | HIS | A | 552 | -6.744  | 4.869  | -34.606 | 1.00 | 18.44 | C |
| ATOM | 1759 | C   | HIS | A | 552 | -6.429  | 3.726  | -33.654 | 1.00 | 15.49 | C |
| ATOM | 1760 | O   | HIS | A | 552 | -6.940  | 3.679  | -32.537 | 1.00 | 15.21 | O |
| ATOM | 1761 | CB  | HIS | A | 552 | -5.972  | 6.115  | -34.169 | 1.00 | 17.81 | C |
| ATOM | 1762 | CG  | HIS | A | 552 | -6.131  | 7.278  | -35.095 | 1.00 | 21.44 | C |
| ATOM | 1763 | ND1 | HIS | A | 552 | -5.185  | 7.611  | -36.040 | 1.00 | 25.80 | N |
| ATOM | 1764 | CD2 | HIS | A | 552 | -7.129  | 8.184  | -35.225 | 1.00 | 21.21 | C |
| ATOM | 1765 | CE1 | HIS | A | 552 | -5.591  | 8.673  | -36.711 | 1.00 | 28.27 | C |
| ATOM | 1766 | NE2 | HIS | A | 552 | -6.769  | 9.041  | -36.236 | 1.00 | 26.93 | N |
| ATOM | 1767 | N   | ARG | A | 553 | -5.584  | 2.805  | -34.105 | 1.00 | 16.66 | N |
| ATOM | 1768 | CA  | ARG | A | 553 | -5.026  | 1.795  | -33.220 | 1.00 | 13.87 | C |
| ATOM | 1769 | C   | ARG | A | 553 | -4.178  | 2.505  | -32.177 | 1.00 | 13.18 | C |
| ATOM | 1770 | O   | ARG | A | 553 | -3.440  | 3.435  | -32.502 | 1.00 | 14.61 | O |
| ATOM | 1771 | CB  | ARG | A | 553 | -4.160  | 0.813  | -34.007 | 1.00 | 11.73 | C |
| ATOM | 1772 | CG  | ARG | A | 553 | -4.919  | -0.013 | -35.028 | 1.00 | 14.83 | C |
| ATOM | 1773 | CD  | ARG | A | 553 | -3.967  | -0.855 | -35.868 | 1.00 | 12.73 | C |
| ATOM | 1774 | NE  | ARG | A | 553 | -4.685  | -1.757 | -36.764 | 1.00 | 13.31 | N |
| ATOM | 1775 | CZ  | ARG | A | 553 | -5.104  | -2.969 | -36.416 | 1.00 | 14.49 | C |
| ATOM | 1776 | NH1 | ARG | A | 553 | -4.876  | -3.423 | -35.191 | 1.00 | 15.02 | N |
| ATOM | 1777 | NH2 | ARG | A | 553 | -5.750  | -3.726 | -37.291 | 1.00 | 18.42 | N |
| ATOM | 1778 | N   | ARG | A | 554 | -4.279  | 2.074  | -30.925 | 1.00 | 13.84 | N |
| ATOM | 1779 | CA  | ARG | A | 554 | -3.524  | 2.716  | -29.857 | 1.00 | 12.49 | C |
| ATOM | 1780 | C   | ARG | A | 554 | -3.450  | 1.864  | -28.592 | 1.00 | 16.10 | C |
| ATOM | 1781 | O   | ARG | A | 554 | -4.418  | 1.203  | -28.218 | 1.00 | 19.95 | O |
| ATOM | 1782 | CB  | ARG | A | 554 | -4.128  | 4.087  | -29.537 | 1.00 | 12.69 | C |
| ATOM | 1783 | CG  | ARG | A | 554 | -5.564  | 4.030  | -29.036 | 1.00 | 10.96 | C |
| ATOM | 1784 | CD  | ARG | A | 554 | -6.104  | 5.419  | -28.727 | 1.00 | 12.07 | C |
| ATOM | 1785 | NE  | ARG | A | 554 | -6.598  | 6.109  | -29.916 | 1.00 | 10.24 | N |
| ATOM | 1786 | CZ  | ARG | A | 554 | -6.434  | 7.408  | -30.149 | 1.00 | 12.15 | C |
| ATOM | 1787 | NH1 | ARG | A | 554 | -5.778  | 8.163  | -29.279 | 1.00 | 9.87  | N |
| ATOM | 1788 | NH2 | ARG | A | 554 | -6.922  | 7.953  | -31.255 | 1.00 | 11.39 | N |
| ATOM | 1789 | N   | SER | A | 555 | -2.290  | 1.884  | -27.942 | 1.00 | 13.80 | N |
| ATOM | 1790 | CA  | SER | A | 555 | -2.115  | 1.231  | -26.650 | 1.00 | 16.70 | C |
| ATOM | 1791 | C   | SER | A | 555 | -1.533  | 2.232  | -25.663 | 1.00 | 13.75 | C |
| ATOM | 1792 | O   | SER | A | 555 | -0.888  | 3.200  | -26.064 | 1.00 | 15.13 | O |
| ATOM | 1793 | CB  | SER | A | 555 | -1.198  | 0.010  | -26.766 | 1.00 | 18.59 | C |
| ATOM | 1794 | OG  | SER | A | 555 | 0.128   | 0.389  | -27.094 | 1.00 | 19.32 | O |
| ATOM | 1795 | N   | ALA | A | 556 | -1.763  | 1.999  | -24.376 | 1.00 | 14.05 | N |
| ATOM | 1796 | CA  | ALA | A | 556 | -1.326  | 2.931  | -23.342 | 1.00 | 14.54 | C |
| ATOM | 1797 | C   | ALA | A | 556 | -2.108  | 4.236  | -23.450 | 1.00 | 12.57 | C |
| ATOM | 1798 | O   | ALA | A | 556 | -1.574  | 5.319  | -23.209 | 1.00 | 11.73 | O |
| ATOM | 1799 | CB  | ALA | A | 556 | 0.168   | 3.191  | -23.455 | 1.00 | 12.03 | C |
| ATOM | 1800 | N   | LEU | A | 557 | -3.380  | 4.120  | -23.816 | 1.00 | 9.54  | N |

|      |      |     |           |         |        |         |      |       |   |
|------|------|-----|-----------|---------|--------|---------|------|-------|---|
| ATOM | 1801 | CA  | LEU A 557 | -4.235  | 5.285  | -23.993 | 1.00 | 10.48 | C |
| ATOM | 1802 | C   | LEU A 557 | -4.924  | 5.677  | -22.693 | 1.00 | 11.19 | C |
| ATOM | 1803 | O   | LEU A 557 | -5.172  | 4.836  | -21.832 | 1.00 | 12.94 | O |
| ATOM | 1804 | CB  | LEU A 557 | -5.293  | 5.010  | -25.062 | 1.00 | 10.49 | C |
| ATOM | 1805 | CG  | LEU A 557 | -6.258  | 3.858  | -24.768 | 1.00 | 13.67 | C |
| ATOM | 1806 | CD1 | LEU A 557 | -7.566  | 4.044  | -25.528 | 1.00 | 11.14 | C |
| ATOM | 1807 | CD2 | LEU A 557 | -5.626  | 2.512  | -25.110 | 1.00 | 8.40  | C |
| ATOM | 1808 | N   | GLY A 558 | -5.233  | 6.961  | -22.559 | 1.00 | 9.75  | N |
| ATOM | 1809 | CA  | GLY A 558 | -6.023  | 7.434  | -21.441 | 1.00 | 12.12 | C |
| ATOM | 1810 | C   | GLY A 558 | -7.495  | 7.361  | -21.796 | 1.00 | 12.54 | C |
| ATOM | 1811 | O   | GLY A 558 | -7.873  | 7.618  | -22.937 | 1.00 | 11.79 | O |
| ATOM | 1812 | N   | ILE A 559 | -8.329  | 7.007  | -20.824 | 1.00 | 13.32 | N |
| ATOM | 1813 | CA  | ILE A 559 | -9.757  | 6.856  | -21.080 | 1.00 | 15.07 | C |
| ATOM | 1814 | C   | ILE A 559 | -10.596 | 7.443  | -19.953 | 1.00 | 11.26 | C |
| ATOM | 1815 | O   | ILE A 559 | -10.170 | 7.477  | -18.798 | 1.00 | 12.35 | O |
| ATOM | 1816 | CB  | ILE A 559 | -10.141 | 5.372  | -21.267 | 1.00 | 11.27 | C |
| ATOM | 1817 | CG1 | ILE A 559 | -11.484 | 5.252  | -21.989 | 1.00 | 10.53 | C |
| ATOM | 1818 | CG2 | ILE A 559 | -10.180 | 4.658  | -19.924 | 1.00 | 12.59 | C |
| ATOM | 1819 | CD1 | ILE A 559 | -11.888 | 3.827  | -22.294 | 1.00 | 9.43  | C |
| ATOM | 1820 | N   | THR A 560 | -11.793 | 7.903  | -20.297 | 1.00 | 9.18  | N |
| ATOM | 1821 | CA  | THR A 560 | -12.729 | 8.412  | -19.304 | 1.00 | 11.41 | C |
| ATOM | 1822 | C   | THR A 560 | -14.087 | 8.665  | -19.936 | 1.00 | 12.37 | C |
| ATOM | 1823 | O   | THR A 560 | -14.230 | 8.635  | -21.158 | 1.00 | 12.48 | O |
| ATOM | 1824 | CB  | THR A 560 | -12.238 | 9.725  | -18.671 | 1.00 | 13.94 | C |
| ATOM | 1825 | OG1 | THR A 560 | -13.025 | 10.018 | -17.511 | 1.00 | 13.96 | O |
| ATOM | 1826 | CG2 | THR A 560 | -12.357 | 10.875 | -19.663 | 1.00 | 10.18 | C |
| ATOM | 1827 | N   | VAL A 561 | -15.083 | 8.918  | -19.095 | 1.00 | 12.93 | N |
| ATOM | 1828 | CA  | VAL A 561 | -16.426 | 9.215  | -19.570 | 1.00 | 12.72 | C |
| ATOM | 1829 | C   | VAL A 561 | -16.765 | 10.676 | -19.322 | 1.00 | 14.76 | C |
| ATOM | 1830 | O   | VAL A 561 | -16.322 | 11.266 | -18.336 | 1.00 | 14.16 | O |
| ATOM | 1831 | CB  | VAL A 561 | -17.480 | 8.324  | -18.883 | 1.00 | 12.14 | C |
| ATOM | 1832 | CG1 | VAL A 561 | -18.883 | 8.778  | -19.254 | 1.00 | 10.61 | C |
| ATOM | 1833 | CG2 | VAL A 561 | -17.271 | 6.870  | -19.261 | 1.00 | 14.04 | C |
| ATOM | 1834 | N   | HIS A 562 | -17.547 | 11.260 | -20.223 | 1.00 | 14.22 | N |
| ATOM | 1835 | CA  | HIS A 562 | -17.986 | 12.639 | -20.058 | 1.00 | 14.30 | C |
| ATOM | 1836 | C   | HIS A 562 | -19.303 | 12.866 | -20.785 | 1.00 | 14.24 | C |
| ATOM | 1837 | O   | HIS A 562 | -19.353 | 12.781 | -22.016 | 1.00 | 13.40 | O |
| ATOM | 1838 | CB  | HIS A 562 | -16.927 | 13.609 | -20.589 | 1.00 | 13.15 | C |
| ATOM | 1839 | CG  | HIS A 562 | -17.263 | 15.050 | -20.363 | 1.00 | 13.09 | C |
| ATOM | 1840 | ND1 | HIS A 562 | -17.990 | 15.796 | -21.265 | 1.00 | 11.66 | N |
| ATOM | 1841 | CD2 | HIS A 562 | -16.968 | 15.881 | -19.337 | 1.00 | 13.02 | C |
| ATOM | 1842 | CE1 | HIS A 562 | -18.132 | 17.025 | -20.802 | 1.00 | 12.81 | C |
| ATOM | 1843 | NE2 | HIS A 562 | -17.520 | 17.103 | -19.633 | 1.00 | 11.97 | N |
| ATOM | 1844 | N   | GLN A 563 | -20.360 | 13.148 | -20.026 | 1.00 | 15.90 | N |
| ATOM | 1845 | CA  | GLN A 563 | -21.659 | 13.470 | -20.603 | 1.00 | 16.64 | C |
| ATOM | 1846 | C   | GLN A 563 | -22.250 | 12.276 | -21.348 | 1.00 | 16.00 | C |

|      |      |     |           |         |        |         |      |       |   |
|------|------|-----|-----------|---------|--------|---------|------|-------|---|
| ATOM | 1847 | O   | GLN A 563 | -22.924 | 12.452 | -22.367 | 1.00 | 22.41 | O |
| ATOM | 1848 | CB  | GLN A 563 | -21.547 | 14.676 | -21.545 | 1.00 | 23.20 | C |
| ATOM | 1849 | CG  | GLN A 563 | -21.177 | 16.005 | -20.862 | 1.00 | 26.20 | C |
| ATOM | 1850 | CD  | GLN A 563 | -22.330 | 16.610 | -20.081 | 1.00 | 25.35 | C |
| ATOM | 1851 | OE1 | GLN A 563 | -22.416 | 16.465 | -18.859 | 1.00 | 33.74 | O |
| ATOM | 1852 | NE2 | GLN A 563 | -23.233 | 17.278 | -20.788 | 1.00 | 28.75 | N |
| ATOM | 1853 | N   | GLY A 564 | -21.985 | 11.070 | -20.848 | 1.00 | 13.98 | N |
| ATOM | 1854 | CA  | GLY A 564 | -22.529 | 9.857  | -21.434 | 1.00 | 14.71 | C |
| ATOM | 1855 | C   | GLY A 564 | -21.769 | 9.380  | -22.659 | 1.00 | 19.74 | C |
| ATOM | 1856 | O   | GLY A 564 | -22.279 | 8.574  | -23.441 | 1.00 | 15.62 | O |
| ATOM | 1857 | N   | ARG A 565 | -20.551 | 9.886  | -22.830 | 1.00 | 15.23 | N |
| ATOM | 1858 | CA  | ARG A 565 | -19.704 | 9.490  | -23.949 | 1.00 | 17.31 | C |
| ATOM | 1859 | C   | ARG A 565 | -18.324 | 9.061  | -23.466 | 1.00 | 13.07 | C |
| ATOM | 1860 | O   | ARG A 565 | -17.851 | 9.516  | -22.425 | 1.00 | 14.12 | O |
| ATOM | 1861 | CB  | ARG A 565 | -19.563 | 10.630 | -24.960 | 1.00 | 19.24 | C |
| ATOM | 1862 | CG  | ARG A 565 | -20.847 | 11.024 | -25.671 | 1.00 | 16.14 | C |
| ATOM | 1863 | CD  | ARG A 565 | -20.524 | 11.652 | -27.015 | 1.00 | 16.42 | C |
| ATOM | 1864 | NE  | ARG A 565 | -21.635 | 12.419 | -27.571 | 1.00 | 28.73 | N |
| ATOM | 1865 | CZ  | ARG A 565 | -22.771 | 11.884 | -28.005 | 1.00 | 28.74 | C |
| ATOM | 1866 | NH1 | ARG A 565 | -22.959 | 10.575 | -27.927 | 1.00 | 26.25 | N |
| ATOM | 1867 | NH2 | ARG A 565 | -23.725 | 12.661 | -28.502 | 1.00 | 32.25 | N |
| ATOM | 1868 | N   | ILE A 566 | -17.680 | 8.187  | -24.229 | 1.00 | 12.23 | N |
| ATOM | 1869 | CA  | ILE A 566 | -16.349 | 7.707  | -23.882 | 1.00 | 12.02 | C |
| ATOM | 1870 | C   | ILE A 566 | -15.275 | 8.528  | -24.581 | 1.00 | 14.52 | C |
| ATOM | 1871 | O   | ILE A 566 | -15.381 | 8.825  | -25.771 | 1.00 | 12.58 | O |
| ATOM | 1872 | CB  | ILE A 566 | -16.170 | 6.228  | -24.261 | 1.00 | 14.55 | C |
| ATOM | 1873 | CG1 | ILE A 566 | -17.253 | 5.375  | -23.598 | 1.00 | 17.52 | C |
| ATOM | 1874 | CG2 | ILE A 566 | -14.782 | 5.741  | -23.869 | 1.00 | 12.10 | C |
| ATOM | 1875 | CD1 | ILE A 566 | -17.143 | 3.898  | -23.916 | 1.00 | 17.61 | C |
| ATOM | 1876 | N   | TYR A 567 | -14.242 | 8.899  | -23.834 | 1.00 | 13.82 | N |
| ATOM | 1877 | CA  | TYR A 567 | -13.127 | 9.647  | -24.395 | 1.00 | 13.23 | C |
| ATOM | 1878 | C   | TYR A 567 | -11.821 | 8.877  | -24.244 | 1.00 | 12.10 | C |
| ATOM | 1879 | O   | TYR A 567 | -11.482 | 8.417  | -23.154 | 1.00 | 10.11 | O |
| ATOM | 1880 | CB  | TYR A 567 | -13.003 | 11.020 | -23.727 | 1.00 | 11.89 | C |
| ATOM | 1881 | CG  | TYR A 567 | -14.066 | 12.013 | -24.136 | 1.00 | 9.61  | C |
| ATOM | 1882 | CD1 | TYR A 567 | -15.362 | 11.914 | -23.648 | 1.00 | 12.96 | C |
| ATOM | 1883 | CD2 | TYR A 567 | -13.771 | 13.057 | -25.003 | 1.00 | 11.25 | C |
| ATOM | 1884 | CE1 | TYR A 567 | -16.337 | 12.823 | -24.018 | 1.00 | 10.98 | C |
| ATOM | 1885 | CE2 | TYR A 567 | -14.738 | 13.971 | -25.380 | 1.00 | 9.34  | C |
| ATOM | 1886 | CZ  | TYR A 567 | -16.020 | 13.849 | -24.884 | 1.00 | 13.51 | C |
| ATOM | 1887 | OH  | TYR A 567 | -16.987 | 14.758 | -25.255 | 1.00 | 14.11 | O |
| ATOM | 1888 | N   | VAL A 568 | -11.095 | 8.737  | -25.349 | 1.00 | 13.98 | N |
| ATOM | 1889 | CA  | VAL A 568 | -9.767  | 8.139  | -25.326 | 1.00 | 10.62 | C |
| ATOM | 1890 | C   | VAL A 568 | -8.716  | 9.202  | -25.634 | 1.00 | 11.29 | C |
| ATOM | 1891 | O   | VAL A 568 | -8.884  | 9.997  | -26.558 | 1.00 | 15.71 | O |
| ATOM | 1892 | CB  | VAL A 568 | -9.651  | 6.979  | -26.329 | 1.00 | 9.74  | C |



|      |      |               |         |        |         |      |       |   |
|------|------|---------------|---------|--------|---------|------|-------|---|
| ATOM | 1893 | CG1 VAL A 568 | -10.551 | 5.828  | -25.906 | 1.00 | 10.97 | C |
| ATOM | 1894 | CG2 VAL A 568 | -10.002 | 7.449  | -27.731 | 1.00 | 12.26 | C |
| ATOM | 1895 | N LEU A 569   | -7.640  | 9.223  | -24.854 | 1.00 | 11.93 | N |
| ATOM | 1896 | CA LEU A 569  | -6.598  | 10.232 | -25.023 | 1.00 | 10.71 | C |
| ATOM | 1897 | C LEU A 569   | -5.225  | 9.623  | -25.305 | 1.00 | 12.48 | C |
| ATOM | 1898 | O LEU A 569   | -4.773  | 8.725  | -24.593 | 1.00 | 9.51  | O |
| ATOM | 1899 | CB LEU A 569  | -6.517  | 11.145 | -23.794 | 1.00 | 8.41  | C |
| ATOM | 1900 | CG LEU A 569  | -7.717  | 12.048 | -23.495 | 1.00 | 9.64  | C |
| ATOM | 1901 | CD1 LEU A 569 | -8.872  | 11.254 | -22.904 | 1.00 | 11.19 | C |
| ATOM | 1902 | CD2 LEU A 569 | -7.322  | 13.190 | -22.571 | 1.00 | 11.21 | C |
| ATOM | 1903 | N GLY A 570   | -4.573  | 10.121 | -26.351 | 1.00 | 12.58 | N |
| ATOM | 1904 | CA GLY A 570  | -3.210  | 9.732  | -26.670 | 1.00 | 13.04 | C |
| ATOM | 1905 | C GLY A 570   | -2.993  | 8.244  | -26.871 | 1.00 | 11.76 | C |
| ATOM | 1906 | O GLY A 570   | -3.909  | 7.511  | -27.244 | 1.00 | 11.46 | O |
| ATOM | 1907 | N GLY A 571   | -1.766  | 7.800  | -26.622 | 1.00 | 12.03 | N |
| ATOM | 1908 | CA GLY A 571  | -1.404  | 6.410  | -26.816 | 1.00 | 12.00 | C |
| ATOM | 1909 | C GLY A 571   | -0.311  | 6.247  | -27.853 | 1.00 | 13.74 | C |
| ATOM | 1910 | O GLY A 571   | 0.178   | 7.223  | -28.426 | 1.00 | 11.98 | O |
| ATOM | 1911 | N TYR A 572   | 0.071   | 4.999  | -28.096 | 1.00 | 14.98 | N |
| ATOM | 1912 | CA TYR A 572  | 1.128   | 4.679  | -29.042 | 1.00 | 15.22 | C |
| ATOM | 1913 | C TYR A 572   | 0.560   | 3.752  | -30.110 | 1.00 | 15.38 | C |
| ATOM | 1914 | O TYR A 572   | -0.057  | 2.739  | -29.787 | 1.00 | 16.96 | O |
| ATOM | 1915 | CB TYR A 572  | 2.289   | 4.011  | -28.303 | 1.00 | 18.91 | C |
| ATOM | 1916 | CG TYR A 572  | 3.525   | 3.777  | -29.138 | 1.00 | 24.77 | C |
| ATOM | 1917 | CD1 TYR A 572 | 4.278   | 4.844  | -29.612 | 1.00 | 24.47 | C |
| ATOM | 1918 | CD2 TYR A 572 | 3.953   | 2.488  | -29.433 | 1.00 | 25.47 | C |
| ATOM | 1919 | CE1 TYR A 572 | 5.415   | 4.634  | -30.372 | 1.00 | 23.62 | C |
| ATOM | 1920 | CE2 TYR A 572 | 5.092   | 2.269  | -30.191 | 1.00 | 24.65 | C |
| ATOM | 1921 | CZ TYR A 572  | 5.817   | 3.346  | -30.656 | 1.00 | 24.21 | C |
| ATOM | 1922 | OH TYR A 572  | 6.947   | 3.135  | -31.409 | 1.00 | 35.84 | O |
| ATOM | 1923 | N ASP A 573   | 0.752   | 4.103  | -31.379 | 1.00 | 16.50 | N |
| ATOM | 1924 | CA ASP A 573  | 0.164   | 3.333  | -32.476 | 1.00 | 17.79 | C |
| ATOM | 1925 | C ASP A 573   | 1.155   | 2.360  | -33.107 | 1.00 | 19.66 | C |
| ATOM | 1926 | O ASP A 573   | 0.808   | 1.613  | -34.021 | 1.00 | 18.38 | O |
| ATOM | 1927 | CB ASP A 573  | -0.415  | 4.263  | -33.547 | 1.00 | 17.72 | C |
| ATOM | 1928 | CG ASP A 573  | 0.660   | 4.928  | -34.392 | 1.00 | 20.78 | C |
| ATOM | 1929 | OD1 ASP A 573 | 1.837   | 4.937  | -33.973 | 1.00 | 19.82 | O |
| ATOM | 1930 | OD2 ASP A 573 | 0.323   | 5.449  | -35.477 | 1.00 | 16.89 | O |
| ATOM | 1931 | N GLY A 574   | 2.387   | 2.371  | -32.613 | 1.00 | 23.21 | N |
| ATOM | 1932 | CA GLY A 574  | 3.417   | 1.496  | -33.137 | 1.00 | 23.78 | C |
| ATOM | 1933 | C GLY A 574   | 4.607   | 2.273  | -33.659 | 1.00 | 27.67 | C |
| ATOM | 1934 | O GLY A 574   | 5.741   | 1.798  | -33.597 | 1.00 | 30.15 | O |
| ATOM | 1935 | N HIS A 575   | 4.348   | 3.471  | -34.175 | 1.00 | 27.65 | N |
| ATOM | 1936 | CA HIS A 575  | 5.408   | 4.336  | -34.682 | 1.00 | 28.07 | C |
| ATOM | 1937 | C HIS A 575   | 5.360   | 5.697  | -34.002 | 1.00 | 27.27 | C |
| ATOM | 1938 | O HIS A 575   | 6.388   | 6.351  | -33.823 | 1.00 | 28.27 | O |

|      |      |     |     |   |     |        |        |         |      |       |   |
|------|------|-----|-----|---|-----|--------|--------|---------|------|-------|---|
| ATOM | 1939 | CB  | HIS | A | 575 | 5.276  | 4.535  | -36.195 | 1.00 | 26.23 | C |
| ATOM | 1940 | CG  | HIS | A | 575 | 4.891  | 3.298  | -36.943 | 1.00 | 41.12 | C |
| ATOM | 1941 | ND1 | HIS | A | 575 | 5.807  | 2.341  | -37.325 | 1.00 | 49.51 | N |
| ATOM | 1942 | CD2 | HIS | A | 575 | 3.688  | 2.866  | -37.392 | 1.00 | 39.13 | C |
| ATOM | 1943 | CE1 | HIS | A | 575 | 5.185  | 1.371  | -37.970 | 1.00 | 43.16 | C |
| ATOM | 1944 | NE2 | HIS | A | 575 | 3.898  | 1.665  | -38.024 | 1.00 | 45.33 | N |
| ATOM | 1945 | N   | THR | A | 576 | 4.158  | 6.118  | -33.623 | 1.00 | 21.18 | N |
| ATOM | 1946 | CA  | THR | A | 576 | 3.938  | 7.489  | -33.184 | 1.00 | 19.01 | C |
| ATOM | 1947 | C   | THR | A | 576 | 3.209  | 7.586  | -31.847 | 1.00 | 21.12 | C |
| ATOM | 1948 | O   | THR | A | 576 | 2.286  | 6.820  | -31.570 | 1.00 | 21.18 | O |
| ATOM | 1949 | CB  | THR | A | 576 | 3.127  | 8.275  | -34.236 | 1.00 | 22.43 | C |
| ATOM | 1950 | OG1 | THR | A | 576 | 3.775  | 8.185  | -35.512 | 1.00 | 21.51 | O |
| ATOM | 1951 | CG2 | THR | A | 576 | 2.999  | 9.737  | -33.835 | 1.00 | 23.27 | C |
| ATOM | 1952 | N   | PHE | A | 577 | 3.633  | 8.535  | -31.020 | 1.00 | 15.60 | N |
| ATOM | 1953 | CA  | PHE | A | 577 | 2.902  | 8.858  | -29.806 | 1.00 | 15.42 | C |
| ATOM | 1954 | C   | PHE | A | 577 | 1.775  | 9.816  | -30.162 | 1.00 | 13.59 | C |
| ATOM | 1955 | O   | PHE | A | 577 | 2.013  | 10.954 | -30.555 | 1.00 | 12.13 | O |
| ATOM | 1956 | CB  | PHE | A | 577 | 3.838  | 9.453  | -28.757 | 1.00 | 12.74 | C |
| ATOM | 1957 | CG  | PHE | A | 577 | 4.860  | 8.477  | -28.248 | 1.00 | 16.26 | C |
| ATOM | 1958 | CD1 | PHE | A | 577 | 4.577  | 7.660  | -27.166 | 1.00 | 17.09 | C |
| ATOM | 1959 | CD2 | PHE | A | 577 | 6.092  | 8.359  | -28.863 | 1.00 | 17.79 | C |
| ATOM | 1960 | CE1 | PHE | A | 577 | 5.512  | 6.753  | -26.699 | 1.00 | 19.71 | C |
| ATOM | 1961 | CE2 | PHE | A | 577 | 7.030  | 7.454  | -28.401 | 1.00 | 17.47 | C |
| ATOM | 1962 | CZ  | PHE | A | 577 | 6.740  | 6.652  | -27.318 | 1.00 | 15.02 | C |
| ATOM | 1963 | N   | LEU | A | 578 | 0.543  | 9.334  | -30.036 | 1.00 | 15.80 | N |
| ATOM | 1964 | CA  | LEU | A | 578 | -0.618 | 10.045 | -30.557 | 1.00 | 13.51 | C |
| ATOM | 1965 | C   | LEU | A | 578 | -1.006 | 11.250 | -29.715 | 1.00 | 11.29 | C |
| ATOM | 1966 | O   | LEU | A | 578 | -0.927 | 11.217 | -28.490 | 1.00 | 11.45 | O |
| ATOM | 1967 | CB  | LEU | A | 578 | -1.811 | 9.092  | -30.678 | 1.00 | 12.98 | C |
| ATOM | 1968 | CG  | LEU | A | 578 | -1.603 | 7.866  | -31.569 | 1.00 | 12.84 | C |
| ATOM | 1969 | CD1 | LEU | A | 578 | -2.832 | 6.972  | -31.548 | 1.00 | 12.58 | C |
| ATOM | 1970 | CD2 | LEU | A | 578 | -1.273 | 8.294  | -32.990 | 1.00 | 12.75 | C |
| ATOM | 1971 | N   | ASP | A | 579 | -1.422 | 12.316 | -30.389 | 1.00 | 13.14 | N |
| ATOM | 1972 | CA  | ASP | A | 579 | -1.983 | 13.480 | -29.722 | 1.00 | 13.37 | C |
| ATOM | 1973 | C   | ASP | A | 579 | -3.493 | 13.473 | -29.931 | 1.00 | 13.29 | C |
| ATOM | 1974 | O   | ASP | A | 579 | -4.216 | 14.321 | -29.408 | 1.00 | 12.57 | O |
| ATOM | 1975 | CB  | ASP | A | 579 | -1.373 | 14.764 | -30.284 | 1.00 | 12.64 | C |
| ATOM | 1976 | CG  | ASP | A | 579 | -1.816 | 15.046 | -31.707 | 1.00 | 16.52 | C |
| ATOM | 1977 | OD1 | ASP | A | 579 | -2.360 | 14.128 | -32.356 | 1.00 | 20.18 | O |
| ATOM | 1978 | OD2 | ASP | A | 579 | -1.617 | 16.185 | -32.178 | 1.00 | 18.71 | O |
| ATOM | 1979 | N   | SER | A | 580 | -3.956 | 12.493 | -30.699 | 1.00 | 13.42 | N |
| ATOM | 1980 | CA  | SER | A | 580 | -5.361 | 12.384 | -31.075 | 1.00 | 14.74 | C |
| ATOM | 1981 | C   | SER | A | 580 | -6.283 | 12.097 | -29.891 | 1.00 | 12.71 | C |
| ATOM | 1982 | O   | SER | A | 580 | -5.900 | 11.417 | -28.938 | 1.00 | 14.58 | O |
| ATOM | 1983 | CB  | SER | A | 580 | -5.529 | 11.295 | -32.137 | 1.00 | 13.79 | C |
| ATOM | 1984 | OG  | SER | A | 580 | -6.896 | 10.975 | -32.326 | 1.00 | 22.56 | O |

|      |      |     |     |   |     |         |        |         |      |       |   |
|------|------|-----|-----|---|-----|---------|--------|---------|------|-------|---|
| ATOM | 1985 | N   | VAL | A | 581 | -7.503  | 12.618 | -29.964 | 1.00 | 11.41 | N |
| ATOM | 1986 | CA  | VAL | A | 581 | -8.523  | 12.332 | -28.964 | 1.00 | 11.27 | C |
| ATOM | 1987 | C   | VAL | A | 581 | -9.830  | 11.958 | -29.650 | 1.00 | 13.79 | C |
| ATOM | 1988 | O   | VAL | A | 581 | -10.368 | 12.737 | -30.440 | 1.00 | 15.12 | O |
| ATOM | 1989 | CB  | VAL | A | 581 | -8.776  | 13.537 | -28.042 | 1.00 | 12.04 | C |
| ATOM | 1990 | CG1 | VAL | A | 581 | -9.952  | 13.252 | -27.117 | 1.00 | 9.33  | C |
| ATOM | 1991 | CG2 | VAL | A | 581 | -7.523  | 13.874 | -27.248 | 1.00 | 9.64  | C |
| ATOM | 1992 | N   | GLU | A | 582 | -10.334 | 10.766 | -29.346 | 1.00 | 12.32 | N |
| ATOM | 1993 | CA  | GLU | A | 582 | -11.552 | 10.263 | -29.973 | 1.00 | 12.78 | C |
| ATOM | 1994 | C   | GLU | A | 582 | -12.701 | 10.158 | -28.976 | 1.00 | 14.90 | C |
| ATOM | 1995 | O   | GLU | A | 582 | -12.488 | 9.974  | -27.777 | 1.00 | 15.60 | O |
| ATOM | 1996 | CB  | GLU | A | 582 | -11.298 | 8.901  | -30.624 | 1.00 | 14.22 | C |
| ATOM | 1997 | CG  | GLU | A | 582 | -10.112 | 8.890  | -31.575 | 1.00 | 17.67 | C |
| ATOM | 1998 | CD  | GLU | A | 582 | -9.982  | 7.583  | -32.331 | 1.00 | 18.23 | C |
| ATOM | 1999 | OE1 | GLU | A | 582 | -8.854  | 7.246  | -32.750 | 1.00 | 21.14 | O |
| ATOM | 2000 | OE2 | GLU | A | 582 | -11.008 | 6.896  | -32.515 | 1.00 | 19.21 | O |
| ATOM | 2001 | N   | CYS | A | 583 | -13.920 | 10.271 | -29.486 | 1.00 | 12.86 | N |
| ATOM | 2002 | CA  | CYS | A | 583 | -15.112 | 10.230 | -28.654 | 1.00 | 13.01 | C |
| ATOM | 2003 | C   | CYS | A | 583 | -16.058 | 9.137  | -29.147 | 1.00 | 13.99 | C |
| ATOM | 2004 | O   | CYS | A | 583 | -16.303 | 9.018  | -30.348 | 1.00 | 14.85 | O |
| ATOM | 2005 | CB  | CYS | A | 583 | -15.808 | 11.593 | -28.677 | 1.00 | 13.49 | C |
| ATOM | 2006 | SG  | CYS | A | 583 | -17.299 | 11.709 | -27.666 | 1.00 | 16.31 | S |
| ATOM | 2007 | N   | TYR | A | 584 | -16.579 | 8.334  | -28.222 | 1.00 | 13.06 | N |
| ATOM | 2008 | CA  | TYR | A | 584 | -17.501 | 7.262  | -28.587 | 1.00 | 13.56 | C |
| ATOM | 2009 | C   | TYR | A | 584 | -18.946 | 7.576  | -28.208 | 1.00 | 15.58 | C |
| ATOM | 2010 | O   | TYR | A | 584 | -19.252 | 7.834  | -27.045 | 1.00 | 13.24 | O |
| ATOM | 2011 | CB  | TYR | A | 584 | -17.078 | 5.932  | -27.960 | 1.00 | 12.30 | C |
| ATOM | 2012 | CG  | TYR | A | 584 | -18.032 | 4.796  | -28.266 | 1.00 | 14.50 | C |
| ATOM | 2013 | CD1 | TYR | A | 584 | -17.949 | 4.098  | -29.464 | 1.00 | 15.09 | C |
| ATOM | 2014 | CD2 | TYR | A | 584 | -19.019 | 4.426  | -27.361 | 1.00 | 13.92 | C |
| ATOM | 2015 | CE1 | TYR | A | 584 | -18.819 | 3.064  | -29.752 | 1.00 | 15.37 | C |
| ATOM | 2016 | CE2 | TYR | A | 584 | -19.893 | 3.390  | -27.640 | 1.00 | 13.50 | C |
| ATOM | 2017 | CZ  | TYR | A | 584 | -19.788 | 2.712  | -28.838 | 1.00 | 15.86 | C |
| ATOM | 2018 | OH  | TYR | A | 584 | -20.653 | 1.682  | -29.126 | 1.00 | 12.92 | O |
| ATOM | 2019 | N   | ASP | A | 585 | -19.827 | 7.549  | -29.204 | 1.00 | 16.85 | N |
| ATOM | 2020 | CA  | ASP | A | 585 | -21.254 | 7.737  | -28.982 | 1.00 | 14.96 | C |
| ATOM | 2021 | C   | ASP | A | 585 | -21.938 | 6.378  | -28.930 | 1.00 | 12.84 | C |
| ATOM | 2022 | O   | ASP | A | 585 | -22.061 | 5.704  | -29.951 | 1.00 | 17.80 | O |
| ATOM | 2023 | CB  | ASP | A | 585 | -21.860 | 8.588  | -30.101 | 1.00 | 17.83 | C |
| ATOM | 2024 | CG  | ASP | A | 585 | -23.315 | 8.942  | -29.847 | 1.00 | 20.66 | C |
| ATOM | 2025 | OD1 | ASP | A | 585 | -23.978 | 8.237  | -29.058 | 1.00 | 21.07 | O |
| ATOM | 2026 | OD2 | ASP | A | 585 | -23.795 | 9.934  | -30.435 | 1.00 | 19.98 | O |
| ATOM | 2027 | N   | PRO | A | 586 | -22.381 | 5.965  | -27.735 | 1.00 | 16.70 | N |
| ATOM | 2028 | CA  | PRO | A | 586 | -23.015 | 4.653  | -27.568 | 1.00 | 15.43 | C |
| ATOM | 2029 | C   | PRO | A | 586 | -24.371 | 4.563  | -28.265 | 1.00 | 16.84 | C |
| ATOM | 2030 | O   | PRO | A | 586 | -24.800 | 3.468  | -28.630 | 1.00 | 18.68 | O |

|      |      |     |     |   |     |         |       |         |      |       |   |
|------|------|-----|-----|---|-----|---------|-------|---------|------|-------|---|
| ATOM | 2031 | CB  | PRO | A | 586 | -23.184 | 4.540 | -26.050 | 1.00 | 13.02 | C |
| ATOM | 2032 | CG  | PRO | A | 586 | -23.226 | 5.949 | -25.571 | 1.00 | 12.20 | C |
| ATOM | 2033 | CD  | PRO | A | 586 | -22.287 | 6.700 | -26.462 | 1.00 | 14.73 | C |
| ATOM | 2034 | N   | ASP | A | 587 | -25.026 | 5.704 | -28.454 | 1.00 | 16.22 | N |
| ATOM | 2035 | CA  | ASP | A | 587 | -26.352 | 5.742 | -29.064 | 1.00 | 16.34 | C |
| ATOM | 2036 | C   | ASP | A | 587 | -26.310 | 5.506 | -30.577 | 1.00 | 21.33 | C |
| ATOM | 2037 | O   | ASP | A | 587 | -27.222 | 4.900 | -31.147 | 1.00 | 15.14 | O |
| ATOM | 2038 | CB  | ASP | A | 587 | -27.037 | 7.075 | -28.752 | 1.00 | 15.96 | C |
| ATOM | 2039 | CG  | ASP | A | 587 | -27.396 | 7.217 | -27.284 | 1.00 | 20.14 | C |
| ATOM | 2040 | OD1 | ASP | A | 587 | -26.968 | 6.362 | -26.479 | 1.00 | 16.64 | O |
| ATOM | 2041 | OD2 | ASP | A | 587 | -28.105 | 8.185 | -26.935 | 1.00 | 21.35 | O |
| ATOM | 2042 | N   | THR | A | 588 | -25.250 | 5.987 | -31.218 | 1.00 | 19.08 | N |
| ATOM | 2043 | CA  | THR | A | 588 | -25.078 | 5.820 | -32.657 | 1.00 | 17.91 | C |
| ATOM | 2044 | C   | THR | A | 588 | -24.029 | 4.758 | -32.958 | 1.00 | 17.91 | C |
| ATOM | 2045 | O   | THR | A | 588 | -23.824 | 4.384 | -34.113 | 1.00 | 19.84 | O |
| ATOM | 2046 | CB  | THR | A | 588 | -24.642 | 7.134 | -33.327 | 1.00 | 19.71 | C |
| ATOM | 2047 | OG1 | THR | A | 588 | -23.461 | 7.628 | -32.682 | 1.00 | 22.08 | O |
| ATOM | 2048 | CG2 | THR | A | 588 | -25.740 | 8.181 | -33.225 | 1.00 | 15.70 | C |
| ATOM | 2049 | N   | ASP | A | 589 | -23.368 | 4.279 | -31.909 | 1.00 | 18.61 | N |
| ATOM | 2050 | CA  | ASP | A | 589 | -22.276 | 3.322 | -32.048 | 1.00 | 18.04 | C |
| ATOM | 2051 | C   | ASP | A | 589 | -21.202 | 3.860 | -32.988 | 1.00 | 17.17 | C |
| ATOM | 2052 | O   | ASP | A | 589 | -20.766 | 3.171 | -33.911 | 1.00 | 18.11 | O |
| ATOM | 2053 | CB  | ASP | A | 589 | -22.794 | 1.974 | -32.549 | 1.00 | 13.09 | C |
| ATOM | 2054 | CG  | ASP | A | 589 | -21.730 | 0.892 | -32.516 | 1.00 | 18.02 | C |
| ATOM | 2055 | OD1 | ASP | A | 589 | -20.900 | 0.901 | -31.582 | 1.00 | 18.56 | O |
| ATOM | 2056 | OD2 | ASP | A | 589 | -21.721 | 0.035 | -33.425 | 1.00 | 18.76 | O |
| ATOM | 2057 | N   | THR | A | 590 | -20.778 | 5.096 | -32.745 | 1.00 | 17.71 | N |
| ATOM | 2058 | CA  | THR | A | 590 | -19.799 | 5.748 | -33.608 | 1.00 | 20.18 | C |
| ATOM | 2059 | C   | THR | A | 590 | -18.626 | 6.350 | -32.838 | 1.00 | 14.90 | C |
| ATOM | 2060 | O   | THR | A | 590 | -18.792 | 6.876 | -31.739 | 1.00 | 17.04 | O |
| ATOM | 2061 | CB  | THR | A | 590 | -20.454 | 6.852 | -34.460 | 1.00 | 17.61 | C |
| ATOM | 2062 | OG1 | THR | A | 590 | -21.282 | 7.671 | -33.626 | 1.00 | 23.96 | O |
| ATOM | 2063 | CG2 | THR | A | 590 | -21.309 | 6.237 | -35.550 | 1.00 | 18.65 | C |
| ATOM | 2064 | N   | TRP | A | 591 | -17.438 | 6.256 | -33.427 | 1.00 | 12.49 | N |
| ATOM | 2065 | CA  | TRP | A | 591 | -16.254 | 6.926 | -32.905 | 1.00 | 15.17 | C |
| ATOM | 2066 | C   | TRP | A | 591 | -15.937 | 8.116 | -33.799 | 1.00 | 15.20 | C |
| ATOM | 2067 | O   | TRP | A | 591 | -16.456 | 8.219 | -34.909 | 1.00 | 19.93 | O |
| ATOM | 2068 | CB  | TRP | A | 591 | -15.051 | 5.978 | -32.884 | 1.00 | 12.57 | C |
| ATOM | 2069 | CG  | TRP | A | 591 | -15.061 | 4.962 | -31.779 | 1.00 | 13.24 | C |
| ATOM | 2070 | CD1 | TRP | A | 591 | -15.523 | 3.680 | -31.848 | 1.00 | 13.77 | C |
| ATOM | 2071 | CD2 | TRP | A | 591 | -14.565 | 5.137 | -30.445 | 1.00 | 14.14 | C |
| ATOM | 2072 | NE1 | TRP | A | 591 | -15.352 | 3.049 | -30.639 | 1.00 | 12.65 | N |
| ATOM | 2073 | CE2 | TRP | A | 591 | -14.768 | 3.922 | -29.761 | 1.00 | 14.24 | C |
| ATOM | 2074 | CE3 | TRP | A | 591 | -13.973 | 6.203 | -29.763 | 1.00 | 12.29 | C |
| ATOM | 2075 | CZ2 | TRP | A | 591 | -14.399 | 3.745 | -28.429 | 1.00 | 11.54 | C |
| ATOM | 2076 | CZ3 | TRP | A | 591 | -13.609 | 6.025 | -28.438 | 1.00 | 11.00 | C |

|      |      |     |     |   |     |         |        |         |      |       |   |
|------|------|-----|-----|---|-----|---------|--------|---------|------|-------|---|
| ATOM | 2077 | CH2 | TRP | A | 591 | -13.823 | 4.806  | -27.787 | 1.00 | 10.98 | C |
| ATOM | 2078 | N   | SER | A | 592 | -15.078 | 9.008  | -33.322 | 1.00 | 14.91 | N |
| ATOM | 2079 | CA  | SER | A | 592 | -14.665 | 10.158 | -34.117 | 1.00 | 18.22 | C |
| ATOM | 2080 | C   | SER | A | 592 | -13.733 | 11.069 | -33.334 | 1.00 | 15.06 | C |
| ATOM | 2081 | O   | SER | A | 592 | -13.953 | 11.323 | -32.152 | 1.00 | 18.24 | O |
| ATOM | 2082 | CB  | SER | A | 592 | -15.887 | 10.951 | -34.586 | 1.00 | 21.41 | C |
| ATOM | 2083 | OG  | SER | A | 592 | -16.667 | 11.383 | -33.485 | 1.00 | 16.43 | O |
| ATOM | 2084 | N   | GLU | A | 593 | -12.689 | 11.554 | -33.998 | 1.00 | 16.95 | N |
| ATOM | 2085 | CA  | GLU | A | 593 | -11.799 | 12.531 | -33.391 | 1.00 | 14.92 | C |
| ATOM | 2086 | C   | GLU | A | 593 | -12.553 | 13.835 | -33.173 | 1.00 | 18.74 | C |
| ATOM | 2087 | O   | GLU | A | 593 | -13.299 | 14.282 | -34.047 | 1.00 | 15.36 | O |
| ATOM | 2088 | CB  | GLU | A | 593 | -10.577 | 12.779 | -34.276 | 1.00 | 15.58 | C |
| ATOM | 2089 | CG  | GLU | A | 593 | -9.710  | 11.557 | -34.502 | 1.00 | 18.74 | C |
| ATOM | 2090 | CD  | GLU | A | 593 | -8.366  | 11.911 | -35.107 | 1.00 | 22.79 | C |
| ATOM | 2091 | OE1 | GLU | A | 593 | -7.873  | 11.144 | -35.960 | 1.00 | 25.58 | O |
| ATOM | 2092 | OE2 | GLU | A | 593 | -7.802  | 12.958 | -34.725 | 1.00 | 18.13 | O |
| ATOM | 2093 | N   | VAL | A | 594 | -12.356 | 14.441 | -32.007 | 1.00 | 16.81 | N |
| ATOM | 2094 | CA  | VAL | A | 594 | -13.053 | 15.674 | -31.663 | 1.00 | 13.18 | C |
| ATOM | 2095 | C   | VAL | A | 594 | -12.074 | 16.811 | -31.393 | 1.00 | 18.37 | C |
| ATOM | 2096 | O   | VAL | A | 594 | -12.410 | 17.986 | -31.547 | 1.00 | 20.85 | O |
| ATOM | 2097 | CB  | VAL | A | 594 | -13.963 | 15.477 | -30.447 | 1.00 | 11.25 | C |
| ATOM | 2098 | CG1 | VAL | A | 594 | -15.120 | 14.555 | -30.810 | 1.00 | 14.41 | C |
| ATOM | 2099 | CG2 | VAL | A | 594 | -13.169 | 14.918 | -29.275 | 1.00 | 10.49 | C |
| ATOM | 2100 | N   | THR | A | 595 | -10.861 | 16.450 | -30.995 | 1.00 | 14.56 | N |
| ATOM | 2101 | CA  | THR | A | 595 | -9.810  | 17.429 | -30.773 | 1.00 | 14.11 | C |
| ATOM | 2102 | C   | THR | A | 595 | -8.468  | 16.724 | -30.724 | 1.00 | 12.84 | C |
| ATOM | 2103 | O   | THR | A | 595 | -8.369  | 15.541 | -31.043 | 1.00 | 16.06 | O |
| ATOM | 2104 | CB  | THR | A | 595 | -10.010 | 18.181 | -29.450 | 1.00 | 11.46 | C |
| ATOM | 2105 | OG1 | THR | A | 595 | -8.998  | 19.184 | -29.316 | 1.00 | 10.82 | O |
| ATOM | 2106 | CG2 | THR | A | 595 | -9.915  | 17.223 | -28.276 | 1.00 | 10.48 | C |
| ATOM | 2107 | N   | ARG | A | 596 | -7.434  | 17.454 | -30.326 | 1.00 | 10.79 | N |
| ATOM | 2108 | CA  | ARG | A | 596 | -6.135  | 16.843 | -30.083 | 1.00 | 14.13 | C |
| ATOM | 2109 | C   | ARG | A | 596 | -5.421  | 17.529 | -28.927 | 1.00 | 13.44 | C |
| ATOM | 2110 | O   | ARG | A | 596 | -5.572  | 18.732 | -28.717 | 1.00 | 12.74 | O |
| ATOM | 2111 | CB  | ARG | A | 596 | -5.266  | 16.844 | -31.345 | 1.00 | 18.43 | C |
| ATOM | 2112 | CG  | ARG | A | 596 | -4.878  | 18.219 | -31.875 | 1.00 | 22.29 | C |
| ATOM | 2113 | CD  | ARG | A | 596 | -3.814  | 18.078 | -32.959 | 1.00 | 25.29 | C |
| ATOM | 2114 | NE  | ARG | A | 596 | -3.419  | 19.359 | -33.539 | 1.00 | 31.75 | N |
| ATOM | 2115 | CZ  | ARG | A | 596 | -2.643  | 20.248 | -32.926 | 1.00 | 37.00 | C |
| ATOM | 2116 | NH1 | ARG | A | 596 | -2.188  | 20.003 | -31.703 | 1.00 | 28.99 | N |
| ATOM | 2117 | NH2 | ARG | A | 596 | -2.330  | 21.387 | -33.531 | 1.00 | 32.43 | N |
| ATOM | 2118 | N   | MET | A | 597 | -4.657  | 16.748 | -28.171 | 1.00 | 12.50 | N |
| ATOM | 2119 | CA  | MET | A | 597 | -3.919  | 17.270 | -27.032 | 1.00 | 11.62 | C |
| ATOM | 2120 | C   | MET | A | 597 | -2.864  | 18.246 | -27.534 | 1.00 | 12.94 | C |
| ATOM | 2121 | O   | MET | A | 597 | -2.615  | 18.326 | -28.735 | 1.00 | 14.23 | O |
| ATOM | 2122 | CB  | MET | A | 597 | -3.272  | 16.123 | -26.256 | 1.00 | 15.49 | C |

|      |      |     |      |   |     |        |        |         |      |       |   |
|------|------|-----|------|---|-----|--------|--------|---------|------|-------|---|
| ATOM | 2123 | CG  | MET  | A | 597 | -4.233 | 14.978 | -25.948 | 1.00 | 17.25 | C |
| ATOM | 2124 | SD  | MET  | A | 597 | -3.449 | 13.529 | -25.211 | 1.00 | 14.17 | S |
| ATOM | 2125 | CE  | MET  | A | 597 | -3.019 | 14.161 | -23.595 | 1.00 | 18.21 | C |
| ATOM | 2126 | N   | THR  | A | 598 | -2.249 | 18.987 | -26.621 | 1.00 | 12.27 | N |
| ATOM | 2127 | CA  | THR  | A | 598 | -1.251 | 19.980 | -27.002 | 1.00 | 11.06 | C |
| ATOM | 2128 | C   | THR  | A | 598 | 0.047  | 19.329 | -27.472 | 1.00 | 12.95 | C |
| ATOM | 2129 | O   | THR  | A | 598 | 0.901  | 19.985 | -28.066 | 1.00 | 16.02 | O |
| ATOM | 2130 | CB  | THR  | A | 598 | -0.962 | 20.966 | -25.855 | 1.00 | 14.17 | C |
| ATOM | 2131 | OG1 | THR  | A | 598 | -0.588 | 20.241 | -24.676 | 1.00 | 13.88 | O |
| ATOM | 2132 | CG2 | THR  | A | 598 | -2.195 | 21.809 | -25.561 | 1.00 | 9.18  | C |
| ATOM | 2133 | N   | SER  | A | 599 | 0.187  | 18.036 | -27.206 | 1.00 | 13.36 | N |
| ATOM | 2134 | CA  | SER  | A | 599 | 1.350  | 17.283 | -27.659 | 1.00 | 12.43 | C |
| ATOM | 2135 | C   | SER  | A | 599 | 1.091  | 15.785 | -27.546 | 1.00 | 10.14 | C |
| ATOM | 2136 | O   | SER  | A | 599 | 0.483  | 15.325 | -26.583 | 1.00 | 12.06 | O |
| ATOM | 2137 | CB  | SER  | A | 599 | 2.595  | 17.673 | -26.857 | 1.00 | 8.99  | C |
| ATOM | 2138 | OG  | SER  | A | 599 | 2.407  | 17.453 | -25.470 | 1.00 | 11.94 | O |
| ATOM | 2139 | N   | GLY  | A | 600 | 1.545  | 15.028 | -28.540 | 1.00 | 13.27 | N |
| ATOM | 2140 | CA  | GLY  | A | 600 | 1.395  | 13.585 | -28.522 | 1.00 | 12.46 | C |
| ATOM | 2141 | C   | GLY  | A | 600 | 2.042  | 12.987 | -27.289 | 1.00 | 12.28 | C |
| ATOM | 2142 | O   | GLY  | A | 600 | 3.095  | 13.450 | -26.849 | 1.00 | 9.52  | O |
| ATOM | 2143 | N   | ARG  | A | 601 | 1.414  | 11.958 | -26.730 | 1.00 | 12.30 | N |
| ATOM | 2144 | CA  | ARG  | A | 601 | 1.898  | 11.347 | -25.498 | 1.00 | 10.47 | C |
| ATOM | 2145 | C   | ARG  | A | 601 | 1.142  | 10.058 | -25.198 | 1.00 | 14.32 | C |
| ATOM | 2146 | O   | ARG  | A | 601 | -0.013 | 9.901  | -25.594 | 1.00 | 14.78 | O |
| ATOM | 2147 | CB  | ARG  | A | 601 | 1.741  | 12.319 | -24.328 | 1.00 | 11.36 | C |
| ATOM | 2148 | CG  | ARG  | A | 601 | 0.299  | 12.533 | -23.897 | 1.00 | 12.62 | C |
| ATOM | 2149 | CD  | ARG  | A | 601 | 0.159  | 13.706 | -22.934 | 1.00 | 10.03 | C |
| ATOM | 2150 | NE  | ARG  | A | 601 | 0.292  | 14.991 | -23.614 | 1.00 | 11.75 | N |
| ATOM | 2151 | CZ  | ARG  | A | 601 | -0.066 | 16.157 | -23.087 | 1.00 | 13.58 | C |
| ATOM | 2152 | NH1 | ARG  | A | 601 | -0.588 | 16.207 | -21.869 | 1.00 | 14.57 | N |
| ATOM | 2153 | NH2 | ARG  | A | 601 | 0.091  | 17.276 | -23.780 | 1.00 | 12.62 | N |
| ATOM | 2154 | N   | SER  | A | 602 | 1.801  | 9.140  | -24.497 | 1.00 | 14.09 | N |
| ATOM | 2155 | C   | SER  | A | 602 | 1.223  | 7.667  | -22.614 | 1.00 | 14.40 | C |
| ATOM | 2156 | O   | SER  | A | 602 | 1.851  | 8.439  | -21.888 | 1.00 | 15.90 | O |
| ATOM | 2157 | CA  | ASER | A | 602 | 1.178  | 7.876  | -24.124 | 0.86 | 14.28 | C |
| ATOM | 2158 | CB  | ASER | A | 602 | 1.854  | 6.703  | -24.841 | 0.86 | 14.54 | C |
| ATOM | 2159 | OG  | ASER | A | 602 | 3.195  | 6.543  | -24.413 | 0.86 | 15.83 | O |
| ATOM | 2160 | CA  | BSER | A | 602 | 1.192  | 7.870  | -24.127 | 0.14 | 14.29 | C |
| ATOM | 2161 | CB  | BSER | A | 602 | 1.914  | 6.717  | -24.828 | 0.14 | 14.39 | C |
| ATOM | 2162 | OG  | BSER | A | 602 | 1.338  | 5.470  | -24.490 | 0.14 | 14.33 | O |
| ATOM | 2163 | N   | GLY  | A | 603 | 0.541  | 6.628  | -22.145 | 1.00 | 10.63 | N |
| ATOM | 2164 | CA  | GLY  | A | 603 | 0.547  | 6.276  | -20.736 | 1.00 | 12.63 | C |
| ATOM | 2165 | C   | GLY  | A | 603 | 0.105  | 7.366  | -19.774 | 1.00 | 14.47 | C |
| ATOM | 2166 | O   | GLY  | A | 603 | 0.672  | 7.504  | -18.691 | 1.00 | 9.19  | O |
| ATOM | 2167 | N   | VAL  | A | 604 | -0.913 | 8.133  | -20.159 | 1.00 | 14.10 | N |
| ATOM | 2168 | CA  | VAL  | A | 604 | -1.449 | 9.180  | -19.293 | 1.00 | 11.15 | C |

|        |      |     |     |   |     |         |        |         |      |       |   |
|--------|------|-----|-----|---|-----|---------|--------|---------|------|-------|---|
| ATOM   | 2169 | C   | VAL | A | 604 | -2.458  | 8.619  | -18.300 | 1.00 | 11.72 | C |
| ATOM   | 2170 | O   | VAL | A | 604 | -2.933  | 7.494  | -18.449 | 1.00 | 9.42  | O |
| ATOM   | 2171 | CB  | VAL | A | 604 | -2.157  | 10.294 | -20.096 | 1.00 | 10.59 | C |
| ATOM   | 2172 | CG1 | VAL | A | 604 | -1.208  | 10.914 | -21.115 | 1.00 | 12.27 | C |
| ATOM   | 2173 | CG2 | VAL | A | 604 | -3.411  | 9.752  | -20.772 | 1.00 | 7.62  | C |
| ATOM   | 2174 | N   | GLY | A | 605 | -2.770  | 9.415  | -17.282 | 1.00 | 11.42 | N |
| ATOM   | 2175 | CA  | GLY | A | 605 | -3.884  | 9.137  | -16.394 | 1.00 | 9.37  | C |
| ATOM   | 2176 | C   | GLY | A | 605 | -4.958  | 10.184 | -16.624 | 1.00 | 10.26 | C |
| ATOM   | 2177 | O   | GLY | A | 605 | -4.646  | 11.356 | -16.824 | 1.00 | 11.46 | O |
| ATOM   | 2178 | N   | VAL | A | 606 | -6.221  | 9.768  | -16.608 | 1.00 | 11.27 | N |
| ATOM   | 2179 | CA  | VAL | A | 606 | -7.323  | 10.675 | -16.913 | 1.00 | 10.98 | C |
| ATOM   | 2180 | C   | VAL | A | 606 | -8.512  | 10.491 | -15.972 | 1.00 | 12.95 | C |
| ATOM   | 2181 | O   | VAL | A | 606 | -8.827  | 9.375  | -15.560 | 1.00 | 16.24 | O |
| ATOM   | 2182 | CB  | VAL | A | 606 | -7.812  | 10.491 | -18.363 | 1.00 | 15.32 | C |
| ATOM   | 2183 | CG1 | VAL | A | 606 | -8.808  | 11.579 | -18.726 | 1.00 | 13.61 | C |
| ATOM   | 2184 | CG2 | VAL | A | 606 | -6.637  | 10.501 | -19.329 | 1.00 | 14.70 | C |
| ATOM   | 2185 | N   | ALA | A | 607 | -9.170  | 11.597 | -15.640 | 1.00 | 11.10 | N |
| ATOM   | 2186 | CA  | ALA | A | 607 | -10.358 | 11.567 | -14.796 | 1.00 | 11.67 | C |
| ATOM   | 2187 | C   | ALA | A | 607 | -11.225 | 12.789 | -15.070 | 1.00 | 10.73 | C |
| ATOM   | 2188 | O   | ALA | A | 607 | -10.776 | 13.743 | -15.701 | 1.00 | 12.07 | O |
| ATOM   | 2189 | CB  | ALA | A | 607 | -9.967  | 11.504 | -13.326 | 1.00 | 11.25 | C |
| ATOM   | 2190 | N   | VAL | A | 608 | -12.466 | 12.758 | -14.596 | 1.00 | 14.39 | N |
| ATOM   | 2191 | CA  | VAL | A | 608 | -13.402 | 13.856 | -14.827 | 1.00 | 13.26 | C |
| ATOM   | 2192 | C   | VAL | A | 608 | -13.955 | 14.426 | -13.523 | 1.00 | 13.90 | C |
| ATOM   | 2193 | O   | VAL | A | 608 | -14.299 | 13.682 | -12.605 | 1.00 | 11.55 | O |
| ATOM   | 2194 | CB  | VAL | A | 608 | -14.587 | 13.411 | -15.719 | 1.00 | 15.02 | C |
| ATOM   | 2195 | CG1 | VAL | A | 608 | -15.716 | 14.426 | -15.655 | 1.00 | 12.06 | C |
| ATOM   | 2196 | CG2 | VAL | A | 608 | -14.128 | 13.196 | -17.156 | 1.00 | 9.71  | C |
| ATOM   | 2197 | N   | THR | A | 609 | -14.045 | 15.751 | -13.451 | 1.00 | 16.17 | N |
| ATOM   | 2198 | CA  | THR | A | 609 | -14.611 | 16.414 | -12.280 | 1.00 | 15.11 | C |
| ATOM   | 2199 | C   | THR | A | 609 | -14.881 | 17.892 | -12.549 | 1.00 | 15.82 | C |
| ATOM   | 2200 | O   | THR | A | 609 | -14.480 | 18.437 | -13.578 | 1.00 | 16.32 | O |
| ATOM   | 2201 | CB  | THR | A | 609 | -13.687 | 16.286 | -11.054 | 1.00 | 16.75 | C |
| ATOM   | 2202 | OG1 | THR | A | 609 | -14.410 | 16.627 | -9.864  | 1.00 | 18.17 | O |
| ATOM   | 2203 | CG2 | THR | A | 609 | -12.486 | 17.203 | -11.196 | 1.00 | 14.43 | C |
| ATOM   | 2204 | OXT | THR | A | 609 | -15.510 | 18.576 | -11.743 | 1.00 | 16.67 | O |
| TER    |      |     |     |   |     |         |        |         |      |       |   |
| HETATM | 2205 | O   | HOH | W | 1   | -7.710  | 11.893 | -38.996 | 1.00 | 18.56 | O |
| HETATM | 2206 | O   | HOH | W | 2   | 3.869   | 12.031 | -3.233  | 1.00 | 9.75  | O |
| HETATM | 2207 | O   | HOH | W | 3   | -6.702  | 6.932  | -15.739 | 1.00 | 11.89 | O |
| HETATM | 2208 | O   | HOH | W | 4   | 2.737   | 9.502  | -2.126  | 1.00 | 11.81 | O |
| HETATM | 2209 | O   | HOH | W | 5   | -1.051  | 14.755 | -19.523 | 1.00 | 8.75  | O |
| HETATM | 2210 | O   | HOH | W | 6   | -3.265  | -7.974 | -2.437  | 1.00 | 12.65 | O |
| HETATM | 2211 | O   | HOH | W | 7   | -4.360  | 3.144  | -36.867 | 1.00 | 20.96 | O |
| HETATM | 2212 | O   | HOH | W | 8   | -10.818 | 3.846  | -13.402 | 1.00 | 15.38 | O |
| HETATM | 2213 | O   | HOH | W | 9   | -6.977  | 3.014  | -14.421 | 1.00 | 8.92  | O |

|             |   |       |    |         |         |         |      |       |   |
|-------------|---|-------|----|---------|---------|---------|------|-------|---|
| HETATM 2214 | O | HOH W | 10 | -8.896  | 1.656   | -16.138 | 1.00 | 10.02 | O |
| HETATM 2215 | O | HOH W | 11 | -18.973 | 15.474  | -23.550 | 1.00 | 15.10 | O |
| HETATM 2216 | O | HOH W | 12 | -7.609  | -3.866  | -33.652 | 1.00 | 14.09 | O |
| HETATM 2217 | O | HOH W | 13 | -11.977 | -14.258 | -17.990 | 1.00 | 16.20 | O |
| HETATM 2218 | O | HOH W | 14 | 6.832   | 11.267  | -3.697  | 1.00 | 20.17 | O |
| HETATM 2219 | O | HOH W | 15 | -9.555  | 6.199   | -16.644 | 1.00 | 13.25 | O |
| HETATM 2220 | O | HOH W | 16 | -3.416  | 18.534  | -24.179 | 1.00 | 13.41 | O |
| HETATM 2221 | O | HOH W | 17 | 0.749   | 21.302  | -16.219 | 1.00 | 11.79 | O |
| HETATM 2222 | O | HOH W | 18 | -26.319 | 10.816  | -30.596 | 1.00 | 16.86 | O |
| HETATM 2223 | O | HOH W | 19 | -25.214 | -1.087  | -7.535  | 1.00 | 21.74 | O |
| HETATM 2224 | O | HOH W | 20 | 5.839   | 10.375  | -32.151 | 1.00 | 16.63 | O |
| HETATM 2225 | O | HOH W | 21 | -2.557  | 5.827   | -35.594 | 1.00 | 20.29 | O |
| HETATM 2226 | O | HOH W | 22 | -4.495  | 3.081   | -15.701 | 1.00 | 6.61  | O |
| HETATM 2227 | O | HOH W | 23 | 10.021  | 3.593   | -22.334 | 1.00 | 13.72 | O |
| HETATM 2228 | O | HOH W | 24 | -14.415 | -0.175  | -0.571  | 1.00 | 16.03 | O |
| HETATM 2229 | O | HOH W | 25 | -19.686 | -18.805 | -1.196  | 1.00 | 24.44 | O |
| HETATM 2230 | O | HOH W | 26 | -2.521  | -0.023  | -17.830 | 1.00 | 11.36 | O |
| HETATM 2231 | O | HOH W | 27 | -27.780 | 10.935  | -28.433 | 1.00 | 25.40 | O |
| HETATM 2232 | O | HOH W | 28 | -0.812  | 3.985   | 4.315   | 1.00 | 14.11 | O |
| HETATM 2233 | O | HOH W | 29 | -5.753  | 30.665  | -11.356 | 1.00 | 12.72 | O |
| HETATM 2234 | O | HOH W | 30 | -24.652 | -1.944  | -5.014  | 1.00 | 15.99 | O |
| HETATM 2235 | O | HOH W | 31 | 4.033   | 15.404  | -25.145 | 1.00 | 13.27 | O |
| HETATM 2236 | O | HOH W | 32 | -17.435 | 21.303  | -19.851 | 1.00 | 24.99 | O |
| HETATM 2237 | O | HOH W | 33 | -6.938  | 14.757  | -33.084 | 1.00 | 15.15 | O |
| HETATM 2238 | O | HOH W | 34 | -15.639 | -13.880 | -25.263 | 1.00 | 16.49 | O |
| HETATM 2239 | O | HOH W | 35 | -4.251  | -14.604 | -5.864  | 1.00 | 16.33 | O |
| HETATM 2240 | O | HOH W | 36 | 1.881   | 16.195  | -5.478  | 1.00 | 14.17 | O |
| HETATM 2241 | O | HOH W | 37 | 1.806   | 15.596  | -8.063  | 1.00 | 7.48  | O |
| HETATM 2242 | O | HOH W | 38 | -3.632  | 0.551   | -19.868 | 1.00 | 17.23 | O |
| HETATM 2243 | O | HOH W | 39 | -7.778  | 23.929  | -11.178 | 1.00 | 12.31 | O |
| HETATM 2244 | O | HOH W | 40 | -6.709  | -13.891 | -3.824  | 1.00 | 16.20 | O |
| HETATM 2245 | O | HOH W | 41 | 0.824   | 25.056  | -22.054 | 1.00 | 21.00 | O |
| HETATM 2246 | O | HOH W | 42 | 0.035   | -11.344 | -3.919  | 1.00 | 18.46 | O |
| HETATM 2247 | O | HOH W | 43 | -6.296  | -11.706 | -29.133 | 1.00 | 18.28 | O |
| HETATM 2248 | O | HOH W | 44 | -4.559  | 5.268   | -17.441 | 1.00 | 12.25 | O |
| HETATM 2249 | O | HOH W | 45 | -20.203 | 1.648   | -7.983  | 1.00 | 20.37 | O |
| HETATM 2250 | O | HOH W | 46 | -19.226 | 3.432   | -5.406  | 1.00 | 23.82 | O |
| HETATM 2251 | O | HOH W | 47 | -2.365  | 5.194   | -19.776 | 1.00 | 13.66 | O |
| HETATM 2252 | O | HOH W | 48 | -13.991 | -2.869  | -32.512 | 1.00 | 15.19 | O |
| HETATM 2253 | O | HOH W | 49 | -19.806 | 3.027   | -36.664 | 1.00 | 19.61 | O |
| HETATM 2254 | O | HOH W | 50 | 12.576  | 3.806   | -16.550 | 1.00 | 11.78 | O |
| HETATM 2255 | O | HOH W | 51 | -6.221  | 30.068  | -8.205  | 1.00 | 23.21 | O |
| HETATM 2256 | O | HOH W | 52 | 0.446   | -15.676 | -8.154  | 1.00 | 26.23 | O |
| HETATM 2257 | O | HOH W | 53 | -1.207  | -9.538  | -1.984  | 1.00 | 13.68 | O |
| HETATM 2258 | O | HOH W | 54 | -21.092 | -5.277  | -11.752 | 1.00 | 15.30 | O |
| HETATM 2259 | O | HOH W | 55 | 17.842  | 5.150   | -12.871 | 1.00 | 22.35 | O |



|             |   |           |         |         |         |      |       |   |
|-------------|---|-----------|---------|---------|---------|------|-------|---|
| HETATM 2260 | O | HOH W 56  | 7.781   | -1.554  | -14.103 | 1.00 | 18.97 | O |
| HETATM 2261 | O | HOH W 57  | -12.484 | -14.765 | -29.143 | 1.00 | 17.15 | O |
| HETATM 2262 | O | HOH W 58  | 2.803   | 21.740  | -8.904  | 1.00 | 12.07 | O |
| HETATM 2263 | O | HOH W 59  | -4.060  | 4.104   | 12.100  | 1.00 | 24.99 | O |
| HETATM 2264 | O | HOH W 60  | -18.299 | 17.145  | -10.717 | 1.00 | 18.28 | O |
| HETATM 2265 | O | HOH W 61  | -26.591 | 0.727   | -10.407 | 1.00 | 17.40 | O |
| HETATM 2266 | O | HOH W 62  | -6.282  | 12.159  | 1.445   | 1.00 | 22.82 | O |
| HETATM 2267 | O | HOH W 63  | -3.579  | 1.971   | 11.458  | 1.00 | 34.23 | O |
| HETATM 2268 | O | HOH W 64  | -16.047 | 12.369  | -11.449 | 1.00 | 17.98 | O |
| HETATM 2269 | O | HOH W 65  | 0.846   | 22.117  | -7.166  | 1.00 | 13.82 | O |
| HETATM 2270 | O | HOH W 66  | -6.978  | 28.436  | -9.661  | 1.00 | 20.33 | O |
| HETATM 2271 | O | HOH W 67  | 7.234   | 8.810   | -7.845  | 1.00 | 5.27  | O |
| HETATM 2272 | O | HOH W 68  | -1.098  | 4.354   | -17.527 | 1.00 | 9.59  | O |
| HETATM 2273 | O | HOH W 69  | -6.686  | 11.489  | -41.073 | 1.00 | 17.91 | O |
| HETATM 2274 | O | HOH W 70  | -23.920 | -5.022  | -12.308 | 1.00 | 21.25 | O |
| HETATM 2275 | O | HOH W 71  | -6.946  | 27.573  | -11.543 | 1.00 | 20.25 | O |
| HETATM 2276 | O | HOH W 72  | 9.792   | 7.415   | -18.369 | 1.00 | 20.84 | O |
| HETATM 2277 | O | HOH W 73  | -15.392 | 9.092   | -6.769  | 1.00 | 22.14 | O |
| HETATM 2278 | O | HOH W 74  | -10.841 | 12.872  | -1.340  | 1.00 | 12.86 | O |
| HETATM 2279 | O | HOH W 75  | 8.551   | 1.171   | -21.810 | 1.00 | 14.69 | O |
| HETATM 2280 | O | HOH W 76  | -1.401  | 1.826   | -16.735 | 1.00 | 9.61  | O |
| HETATM 2281 | O | HOH W 77  | -8.192  | 5.108   | -14.055 | 1.00 | 20.61 | O |
| HETATM 2282 | O | HOH W 78  | -12.728 | 8.115   | -11.045 | 1.00 | 16.55 | O |
| HETATM 2283 | O | HOH W 79  | -17.334 | 4.327   | -12.429 | 1.00 | 24.55 | O |
| HETATM 2284 | O | HOH W 80  | -15.887 | 5.763   | -15.969 | 1.00 | 24.37 | O |
| HETATM 2285 | O | HOH W 81  | 11.383  | 12.025  | -11.975 | 1.00 | 13.53 | O |
| HETATM 2286 | O | HOH W 82  | 2.489   | 24.677  | -15.064 | 1.00 | 13.93 | O |
| HETATM 2287 | O | HOH W 83  | -5.642  | -18.298 | -12.560 | 1.00 | 15.38 | O |
| HETATM 2288 | O | HOH W 84  | -19.918 | -9.869  | -12.005 | 1.00 | 19.49 | O |
| HETATM 2289 | O | HOH W 85  | 2.211   | -8.983  | -6.039  | 1.00 | 12.63 | O |
| HETATM 2290 | O | HOH W 86  | -12.900 | -17.695 | -10.429 | 1.00 | 20.83 | O |
| HETATM 2291 | O | HOH W 87  | -22.471 | 5.912   | -17.191 | 1.00 | 16.93 | O |
| HETATM 2292 | O | HOH W 88  | -13.534 | 9.936   | -13.465 | 1.00 | 17.22 | O |
| HETATM 2293 | O | HOH W 89  | 6.763   | 17.605  | -18.636 | 1.00 | 20.86 | O |
| HETATM 2294 | O | HOH W 90  | 2.655   | 20.610  | -23.877 | 1.00 | 14.41 | O |
| HETATM 2295 | O | HOH W 91  | -1.938  | -3.558  | 4.262   | 1.00 | 11.29 | O |
| HETATM 2296 | O | HOH W 92  | 4.990   | 13.605  | -5.936  | 1.00 | 16.56 | O |
| HETATM 2297 | O | HOH W 93  | 6.623   | 12.855  | -0.773  | 1.00 | 16.69 | O |
| HETATM 2298 | O | HOH W 94  | 3.922   | 13.744  | -8.875  | 1.00 | 16.70 | O |
| HETATM 2299 | O | HOH W 95  | -19.720 | 14.503  | -17.097 | 1.00 | 9.61  | O |
| HETATM 2300 | O | HOH W 96  | -21.145 | 22.261  | -12.896 | 1.00 | 37.33 | O |
| HETATM 2301 | O | HOH W 97  | -3.299  | 20.429  | -2.093  | 1.00 | 17.25 | O |
| HETATM 2302 | O | HOH W 98  | 2.870   | -11.731 | -3.701  | 1.00 | 28.29 | O |
| HETATM 2303 | O | HOH W 99  | 7.487   | -4.809  | -4.993  | 1.00 | 9.43  | O |
| HETATM 2304 | O | HOH W 100 | -11.733 | -5.692  | 3.289   | 1.00 | 16.17 | O |
| HETATM 2305 | O | HOH W 101 | -10.639 | 23.912  | -20.878 | 1.00 | 16.82 | O |

|             |     |           |         |         |         |      |       |     |
|-------------|-----|-----------|---------|---------|---------|------|-------|-----|
| HETATM 2306 | O   | HOH W 102 | -12.910 | 20.357  | -3.674  | 1.00 | 21.21 | O   |
| HETATM 2307 | O   | HOH W 103 | -16.656 | 10.444  | -4.635  | 1.00 | 17.82 | O   |
| HETATM 2308 | O   | HOH W 104 | -10.045 | 21.378  | -29.927 | 1.00 | 13.51 | O   |
| HETATM 2309 | O   | HOH W 105 | 1.774   | 14.854  | -33.884 | 1.00 | 31.30 | O   |
| HETATM 2310 | O   | HOH W 106 | -1.131  | 27.997  | -7.616  | 1.00 | 15.53 | O   |
| HETATM 2311 | O   | HOH W 107 | -8.194  | -14.589 | -27.655 | 1.00 | 23.18 | O   |
| HETATM 2312 | O   | HOH W 108 | -7.622  | 27.459  | -22.256 | 1.00 | 24.68 | O   |
| HETATM 2313 | O   | HOH W 109 | 0.202   | 25.258  | -25.486 | 1.00 | 23.23 | O   |
| HETATM 2314 | O   | HOH W 110 | 5.118   | -3.033  | 1.632   | 1.00 | 14.04 | O   |
| HETATM 2315 | O   | HOH W 111 | 10.172  | 1.352   | -14.292 | 1.00 | 19.07 | O   |
| HETATM 2316 | O   | HOH W 112 | 12.189  | 3.949   | -24.293 | 1.00 | 19.10 | O   |
| HETATM 2317 | O   | HOH W 113 | -12.072 | 3.780   | -16.372 | 1.00 | 16.31 | O   |
| HETATM 2318 | O   | HOH W 114 | 4.656   | -5.873  | -21.734 | 1.00 | 26.82 | O   |
| HETATM 2319 | O   | HOH W 115 | -16.970 | 20.589  | -12.103 | 1.00 | 17.04 | O   |
| HETATM 2320 | O   | HOH W 116 | 8.211   | -2.808  | -17.574 | 1.00 | 29.27 | O   |
| HETATM 2321 | O   | HOH W 117 | 13.422  | 8.756   | -18.726 | 1.00 | 20.22 | O   |
| HETATM 2322 | O   | HOH W 118 | 3.228   | 24.277  | -13.242 | 1.00 | 13.73 | O   |
| HETATM 2323 | O   | HOH W 119 | -14.427 | 28.144  | -27.949 | 1.00 | 22.00 | O   |
| HETATM 2324 | O   | HOH W 120 | 2.033   | 29.478  | -15.114 | 1.00 | 26.70 | O   |
| HETATM 2325 | O   | HOH W 121 | 5.539   | 8.968   | -1.375  | 1.00 | 15.48 | O   |
| HETATM 2326 | O   | HOH W 122 | -3.732  | 15.202  | 1.187   | 1.00 | 24.54 | O   |
| HETATM 2327 | O   | HOH W 123 | 1.367   | 10.080  | 9.422   | 1.00 | 28.22 | O   |
| HETATM 2328 | O   | HOH W 124 | -2.062  | 12.267  | 6.972   | 1.00 | 26.44 | O   |
| HETATM 2329 | O   | HOH W 125 | -21.565 | 4.247   | 1.400   | 1.00 | 25.77 | O   |
| HETATM 2330 | O   | HOH W 126 | -19.612 | 7.944   | 4.731   | 1.00 | 34.81 | O   |
| HETATM 2331 | O   | HOH W 127 | -26.573 | 8.483   | 5.143   | 1.00 | 21.08 | O   |
| HETATM 2332 | O   | HOH W 128 | 8.124   | 6.497   | -5.764  | 1.00 | 14.00 | O   |
| HETATM 2333 | O   | HOH W 129 | 15.549  | -9.465  | -11.062 | 1.00 | 20.99 | O   |
| HETATM 2334 | O   | HOH W 130 | 0.611   | 11.501  | 4.599   | 1.00 | 22.35 | O   |
| HETATM 2335 | O   | HOH W 131 | -7.598  | 1.961   | -18.601 | 1.00 | 15.32 | O   |
| HETATM 2336 | O   | HOH W 132 | -16.407 | -17.864 | -16.001 | 1.00 | 19.20 | O   |
| HETATM 2337 | O   | HOH W 133 | -10.090 | -16.906 | -18.640 | 1.00 | 29.45 | O   |
| HETATM 2338 | O   | HOH W 134 | -5.625  | -16.440 | -24.529 | 1.00 | 24.54 | O   |
| HETATM 2339 | O   | HOH W 135 | -21.534 | -16.902 | -25.625 | 1.00 | 28.19 | O   |
| HETATM 2340 | O   | HOH W 136 | -19.080 | -9.269  | -30.566 | 1.00 | 19.64 | O   |
| HETATM 2341 | O   | HOH W 137 | -23.978 | -1.726  | -30.645 | 1.00 | 23.89 | O   |
| HETATM 2342 | O   | HOH W 138 | -25.626 | 0.501   | -30.630 | 1.00 | 30.31 | O   |
| HETATM 2343 | O   | HOH W 139 | -1.928  | 8.204   | -23.034 | 1.00 | 15.21 | O   |
| HETATM 2344 | O   | HOH W 140 | 8.426   | 0.450   | -17.538 | 1.00 | 26.52 | O   |
| HETATM 2345 | O   | HOH W 141 | 11.526  | 6.525   | -7.608  | 1.00 | 20.48 | O   |
| HETATM 2346 | O   | HOH W 142 | 11.133  | 8.678   | -2.990  | 1.00 | 31.68 | O   |
| HETATM 2347 | O   | HOH W 143 | -24.798 | 9.839   | -27.005 | 1.00 | 23.85 | O   |
| TER         |     |           |         |         |         |      |       |     |
| HETATM 2348 | C01 | BDJ B 1   | 5.063   | -1.783  | -29.817 | 1.00 | 30.56 | A C |
| HETATM 2349 | O02 | BDJ B 1   | 5.555   | -1.668  | -28.506 | 1.00 | 30.51 | A O |
| HETATM 2350 | C03 | BDJ B 1   | 4.650   | -1.696  | -27.392 | 1.00 | 27.42 | A C |

|             |      |     |   |   |       |        |         |      |       |   |   |
|-------------|------|-----|---|---|-------|--------|---------|------|-------|---|---|
| HETATM 2351 | C04  | BDJ | B | 1 | 4.236 | -2.987 | -26.822 | 1.00 | 26.22 | A | C |
| HETATM 2352 | C05  | BDJ | B | 1 | 3.327 | -3.024 | -25.702 | 1.00 | 20.67 | A | C |
| HETATM 2353 | C06  | BDJ | B | 1 | 4.178 | -0.539 | -26.859 | 1.00 | 25.44 | A | C |
| HETATM 2354 | C07  | BDJ | B | 1 | 3.258 | -0.580 | -25.720 | 1.00 | 25.60 | A | C |
| HETATM 2355 | C08  | BDJ | B | 1 | 2.849 | -1.856 | -25.167 | 1.00 | 21.13 | A | C |
| HETATM 2356 | S09  | BDJ | B | 1 | 1.709 | -1.922 | -23.747 | 1.00 | 22.16 | A | S |
| HETATM 2357 | N10  | BDJ | B | 1 | 2.570 | -1.797 | -22.359 | 1.00 | 17.89 | A | N |
| HETATM 2358 | C11  | BDJ | B | 1 | 2.859 | -2.935 | -21.504 | 1.00 | 21.31 | A | C |
| HETATM 2359 | C12  | BDJ | B | 1 | 1.697 | -3.644 | -20.761 | 1.00 | 18.38 | A | C |
| HETATM 2360 | N13  | BDJ | B | 1 | 1.992 | -4.767 | -19.901 | 1.00 | 21.26 | A | N |
| HETATM 2361 | O14  | BDJ | B | 1 | 0.617 | -3.275 | -20.889 | 1.00 | 24.35 | A | O |
| HETATM 2362 | C15  | BDJ | B | 1 | 3.126 | -0.486 | -21.984 | 1.00 | 19.54 | A | C |
| HETATM 2363 | C16  | BDJ | B | 1 | 4.434 | -0.200 | -22.389 | 1.00 | 21.55 | A | C |
| HETATM 2364 | C17  | BDJ | B | 1 | 5.032 | 1.066  | -22.052 | 1.00 | 19.05 | A | C |
| HETATM 2365 | C18  | BDJ | B | 1 | 4.322 | 1.977  | -21.326 | 1.00 | 18.78 | A | C |
| HETATM 2366 | N19  | BDJ | B | 1 | 4.947 | 3.236  | -21.039 | 1.00 | 18.70 | A | N |
| HETATM 2367 | C20  | BDJ | B | 1 | 5.907 | 3.415  | -19.947 | 1.00 | 17.48 | A | C |
| HETATM 2368 | C21  | BDJ | B | 1 | 5.646 | 2.834  | -18.644 | 1.00 | 18.90 | A | C |
| HETATM 2369 | N22  | BDJ | B | 1 | 5.359 | 3.721  | -17.502 | 1.00 | 16.08 | A | N |
| HETATM 2370 | O23  | BDJ | B | 1 | 5.672 | 1.671  | -18.499 | 1.00 | 15.95 | A | O |
| HETATM 2371 | S24  | BDJ | B | 1 | 4.588 | 4.446  | -22.078 | 1.00 | 27.18 | A | S |
| HETATM 2372 | C25  | BDJ | B | 1 | 5.549 | 4.097  | -23.570 | 1.00 | 20.30 | A | C |
| HETATM 2373 | C26  | BDJ | B | 1 | 6.786 | 4.641  | -23.719 | 1.00 | 18.29 | A | C |
| HETATM 2374 | C27  | BDJ | B | 1 | 7.527 | 4.366  | -24.852 | 1.00 | 20.38 | A | C |
| HETATM 2375 | C28  | BDJ | B | 1 | 7.012 | 3.523  | -25.841 | 1.00 | 24.24 | A | C |
| HETATM 2376 | O29  | BDJ | B | 1 | 7.751 | 3.264  | -26.947 | 1.00 | 27.65 | A | O |
| HETATM 2377 | C30  | BDJ | B | 1 | 8.962 | 2.540  | -26.812 | 1.00 | 25.29 | A | C |
| HETATM 2378 | C31  | BDJ | B | 1 | 5.773 | 2.966  | -25.692 | 1.00 | 19.85 | A | C |
| HETATM 2379 | C32  | BDJ | B | 1 | 5.029 | 3.236  | -24.562 | 1.00 | 19.44 | A | C |
| HETATM 2380 | O33  | BDJ | B | 1 | 4.863 | 5.723  | -21.527 | 1.00 | 17.91 | A | O |
| HETATM 2381 | O34  | BDJ | B | 1 | 3.175 | 4.546  | -22.378 | 1.00 | 19.59 | A | O |
| HETATM 2382 | C35  | BDJ | B | 1 | 2.974 | 1.695  | -20.919 | 1.00 | 17.79 | A | C |
| HETATM 2383 | C36  | BDJ | B | 1 | 2.389 | 0.452  | -21.249 | 1.00 | 18.75 | A | C |
| HETATM 2384 | C37  | BDJ | B | 1 | 1.077 | 0.166  | -20.841 | 1.00 | 18.39 | A | C |
| HETATM 2385 | C38  | BDJ | B | 1 | 0.342 | 1.114  | -20.107 | 1.00 | 15.09 | A | C |
| HETATM 2386 | C39  | BDJ | B | 1 | 0.936 | 2.382  | -19.769 | 1.00 | 18.83 | A | C |
| HETATM 2387 | C40  | BDJ | B | 1 | 2.222 | 2.665  | -20.166 | 1.00 | 15.94 | A | C |
| HETATM 2388 | O41  | BDJ | B | 1 | 0.894 | -3.152 | -23.777 | 1.00 | 18.05 | A | O |
| HETATM 2389 | O42  | BDJ | B | 1 | 0.692 | -0.910 | -23.851 | 1.00 | 17.83 | A | O |
| HETATM 2390 | H011 | BDJ | B | 1 | 5.044 | -2.716 | -30.075 | 1.00 | 36.68 | A | H |
| HETATM 2391 | H012 | BDJ | B | 1 | 4.114 | -1.395 | -29.863 | 1.00 | 36.68 | A | H |
| HETATM 2392 | H013 | BDJ | B | 1 | 5.624 | -1.309 | -30.404 | 1.00 | 36.68 | A | H |
| HETATM 2393 | H041 | BDJ | B | 1 | 4.571 | -3.815 | -27.202 | 1.00 | 31.46 | A | H |
| HETATM 2394 | H051 | BDJ | B | 1 | 3.074 | -3.816 | -25.354 | 1.00 | 24.80 | A | H |
| HETATM 2395 | H061 | BDJ | B | 1 | 4.452 | 0.313  | -27.232 | 1.00 | 30.53 | A | H |
| HETATM 2396 | H071 | BDJ | B | 1 | 2.926 | 0.230  | -25.345 | 1.00 | 30.72 | A | H |

|        |      |      |     |   |   |        |        |         |      |       |   |   |
|--------|------|------|-----|---|---|--------|--------|---------|------|-------|---|---|
| HETATM | 2397 | H111 | BDJ | B | 1 | 3.329  | -3.628 | -22.063 | 1.00 | 25.57 | A | H |
| HETATM | 2398 | H112 | BDJ | B | 1 | 3.509  | -2.620 | -20.803 | 1.00 | 25.57 | A | H |
| HETATM | 2399 | H131 | BDJ | B | 1 | 2.845  | -5.049 | -19.804 | 1.00 | 25.52 | A | H |
| HETATM | 2400 | H132 | BDJ | B | 1 | 1.310  | -5.197 | -19.452 | 1.00 | 25.52 | A | H |
| HETATM | 2401 | H161 | BDJ | B | 1 | 4.922  | -0.831 | -22.878 | 1.00 | 25.86 | A | H |
| HETATM | 2402 | H171 | BDJ | B | 1 | 5.932  | 1.266  | -22.331 | 1.00 | 22.87 | A | H |
| HETATM | 2403 | H201 | BDJ | B | 1 | 6.777  | 3.016  | -20.271 | 1.00 | 20.98 | A | H |
| HETATM | 2404 | H202 | BDJ | B | 1 | 6.049  | 4.324  | -19.828 | 1.00 | 20.98 | A | H |
| HETATM | 2405 | H221 | BDJ | B | 1 | 5.343  | 4.631  | -17.622 | 1.00 | 19.30 | A | H |
| HETATM | 2406 | H222 | BDJ | B | 1 | 5.195  | 3.368  | -16.681 | 1.00 | 19.30 | A | H |
| HETATM | 2407 | H261 | BDJ | B | 1 | 7.133  | 5.204  | -23.062 | 1.00 | 21.95 | A | H |
| HETATM | 2408 | H271 | BDJ | B | 1 | 8.428  | 4.771  | -24.964 | 1.00 | 24.46 | A | H |
| HETATM | 2409 | H301 | BDJ | B | 1 | 9.413  | 2.441  | -27.744 | 1.00 | 30.35 | A | H |
| HETATM | 2410 | H302 | BDJ | B | 1 | 8.767  | 1.619  | -26.428 | 1.00 | 30.35 | A | H |
| HETATM | 2411 | H303 | BDJ | B | 1 | 9.586  | 3.041  | -26.185 | 1.00 | 30.35 | A | H |
| HETATM | 2412 | H311 | BDJ | B | 1 | 5.410  | 2.373  | -26.388 | 1.00 | 23.82 | A | H |
| HETATM | 2413 | H321 | BDJ | B | 1 | 4.141  | 2.838  | -24.454 | 1.00 | 23.32 | A | H |
| HETATM | 2414 | H371 | BDJ | B | 1 | 0.669  | -0.686 | -21.065 | 1.00 | 22.07 | A | H |
| HETATM | 2415 | H381 | BDJ | B | 1 | -0.531 | 0.919  | -19.836 | 1.00 | 18.11 | A | H |
| HETATM | 2416 | H391 | BDJ | B | 1 | 0.407  | 3.065  | -19.238 | 1.00 | 22.60 | A | H |
| HETATM | 2417 | H401 | BDJ | B | 1 | 2.626  | 3.537  | -19.933 | 1.00 | 19.12 | A | H |

TER

END

Compound 8  
Solvent: DMSO  
Temperature: 298 K

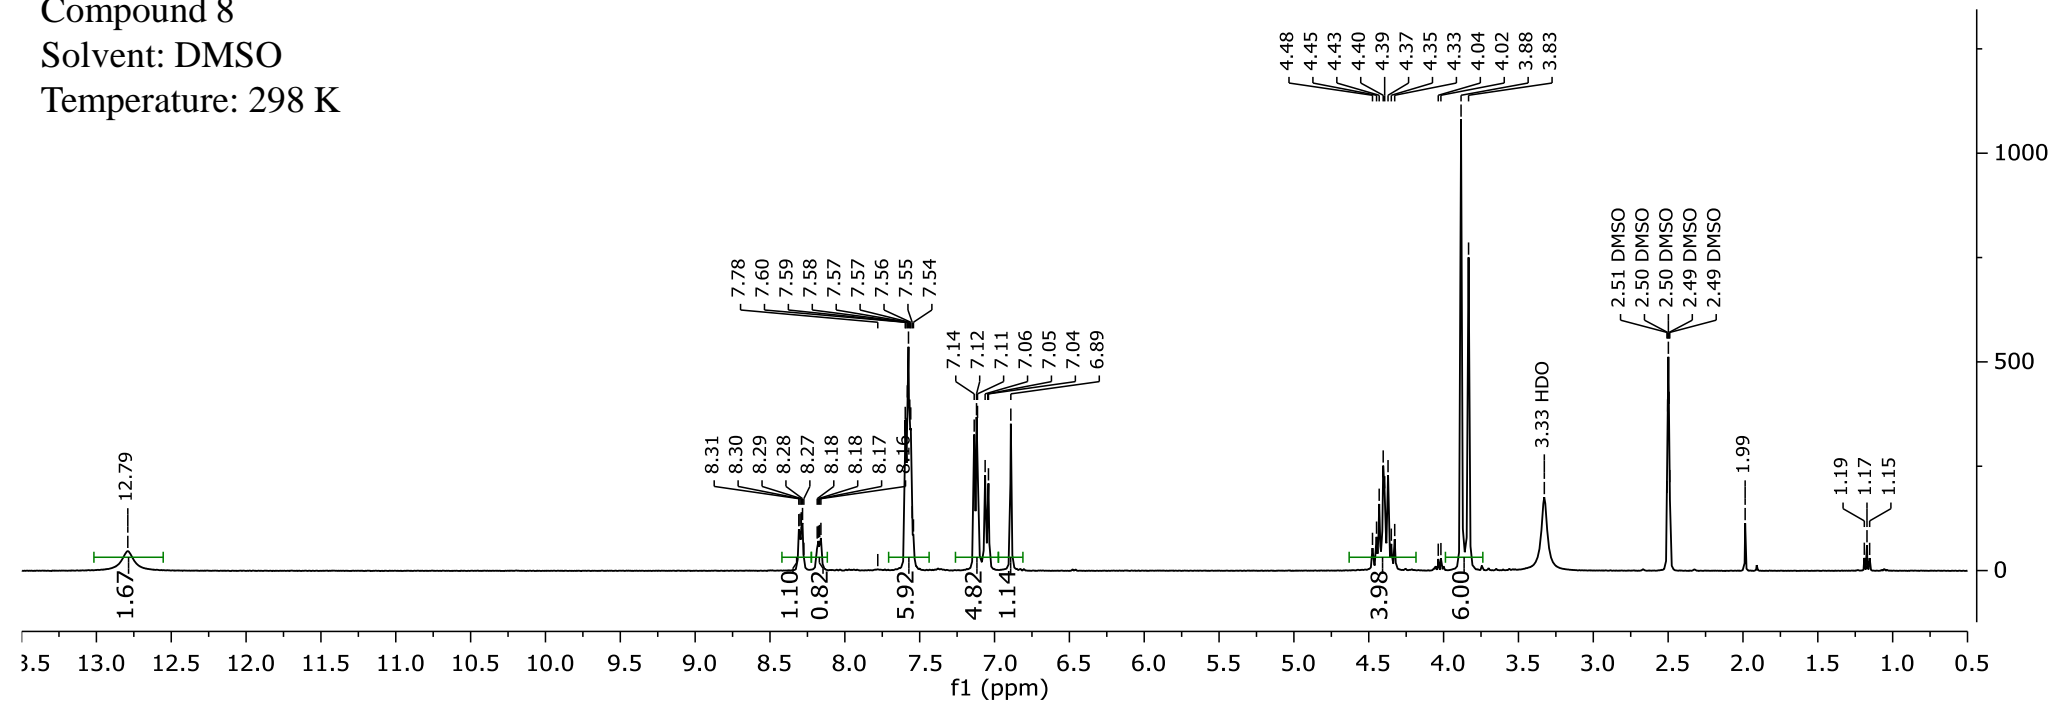

Compound 8  
Solvent: DMSO  
Temperature: 353 K

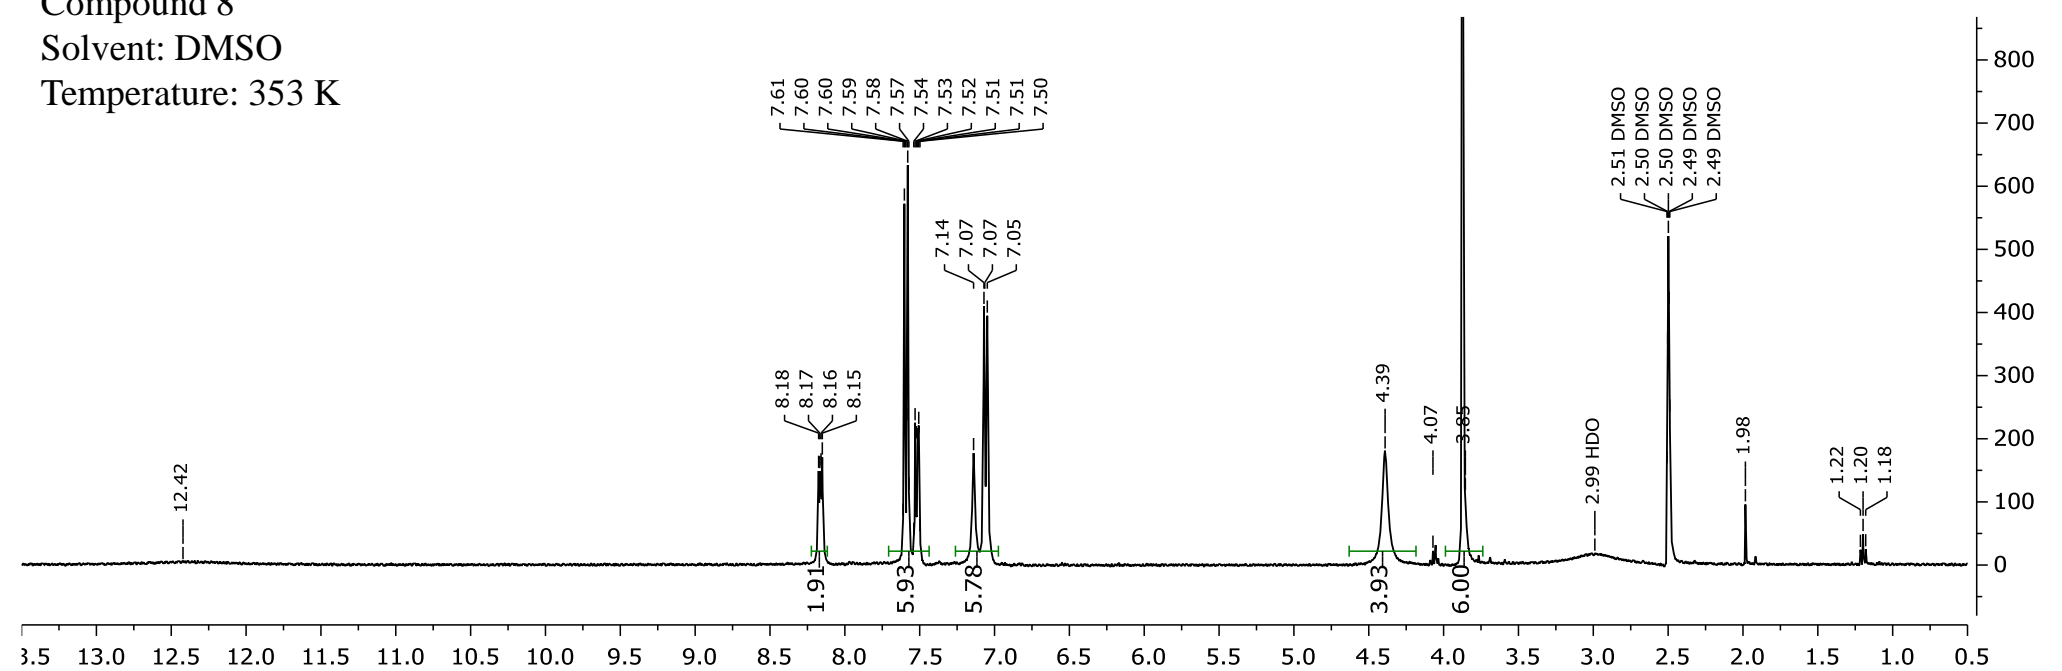

Supplement: NIHMS722497-supplement-1.pdf [file NIHMS722497-supplement-1.pdf]
